# Supplementary material for: Generation of a transient base-stabilised arylalumylene for the facile deconstruction of aromatic molecules
Source: Royal Society of Chemistry journal article supplement (doi:10.1039/d2sc01436j), 2022-01-01
Supplement: d2sc01436j1.pdf [file d2sc01436j1.pdf]

## Electronic Supplementary Information

### **Generation of a transient base-stabilised arylaluminum for the facile deconstruction of aromatic molecules**

Debabrata Dhara,<sup>a,b,‡</sup> Arumugam Jayaraman,<sup>a,b,‡</sup> Marcel Härterich,<sup>a,b</sup> Rian D. Dewhurst<sup>a,b</sup> and  
Holger Braunschweig<sup>a,b\*</sup>

<sup>a</sup> Institute for Inorganic Chemistry, Julius-Maximilians-Universität Würzburg, Am Hubland,  
97074 Würzburg, Germany

<sup>b</sup> Institute for Sustainable Chemistry & Catalysis with Boron, Julius-Maximilians-Universität  
Würzburg, Am Hubland, 97074 Würzburg, Germany

<sup>‡</sup> These authors contributed equally.

## Table of Contents

|                                                                                                                                                                          |     |
|--------------------------------------------------------------------------------------------------------------------------------------------------------------------------|-----|
| 1. Experimental details.....                                                                                                                                             | 3   |
| 1.1. General considerations .....                                                                                                                                        | 3   |
| 1.2. Synthetic procedures .....                                                                                                                                          | 4   |
| 1.3. NMR spectra .....                                                                                                                                                   | 14  |
| 1.4. UV-Vis spectra.....                                                                                                                                                 | 30  |
| 1.5. Crystal structure determination .....                                                                                                                               | 31  |
| 2. Computational chemistry .....                                                                                                                                         | 40  |
| 2.1. Computational details.....                                                                                                                                          | 40  |
| 2.2. Homocoupling of the radical [(NHC)Ar*Al·] .....                                                                                                                     | 41  |
| 2.3. Free energy differences among selected experimental compounds .....                                                                                                 | 46  |
| 2.4. Optimized structures, frontier orbitals and dissociation of dialumenes <b>6</b> and <b>II</b> .....                                                                 | 62  |
| 2.5. Frontier orbitals of alumylene <b>7</b> and its base-free version .....                                                                                             | 73  |
| 2.6. Mechanisms explored for the formation of benzene deconstruction product and C-H activation product using model alumylene <b>7'</b> .....                            | 76  |
| 2.7. First few mechanistic steps explored for the formation of benzene deconstruction product and C-H activation product using the experimental alumylene <b>7</b> ..... | 111 |
| 3. References.....                                                                                                                                                       | 129 |

## 1. Experimental details

### 1.1. General considerations

All manipulations were performed under an atmosphere of dry argon using glovebox or standard Schlenk line techniques. Deuterated solvents were dried over 4 Å molecular sieves and degassed by three freeze-pump-thaw cycles. All other solvents were dried by distillation from appropriate drying agents under an argon atmosphere and stored under argon over activated 4 Å molecular sieves. All NMR spectra were obtained from a Bruker Avance III HD 300 NMR spectrometer ( $^{13}\text{C}\{^1\text{H}\}$ : 75.5 MHz), from a Bruker Avance I 400 NMR spectrometer ( $^1\text{H}$ : 400.6 MHz,  $^{13}\text{C}\{^1\text{H}\}$ : 100.6 MHz) at 298 K unless otherwise stated. Chemical shifts ( $\delta$ ) are provided in ppm and internally referenced to the carbon nuclei ( $^{13}\text{C}\{^1\text{H}\}$ ), residual protons ( $^1\text{H}$ ) of the solvent.  $^{27}\text{Al}$  NMR spectra were referenced to external  $\text{Al}(\text{NO}_3)_3$ . UV/Vis absorption spectra were measured on a METTLER TOLEDO UV/Vis-Excellence UV5 spectrophotometer. Solid-state IR spectra were recorded on a Bruker FT-IR spectrometer ALPHA II inside a glovebox. Microanalyses (C, H, N, S) were performed on an Elementar Vario MICRO cube elemental analyzer. High-resolution mass spectrometry (HRMS) data were obtained from a Thermo Scientific Exactive Plus spectrometer. Aluminium hydride *N,N*-dimethyl ethyl amine complex solution was purchased from Sigma-Aldrich / Merck and used without further purification. Iodomethane was purchased commercially, dried over  $\text{CaH}_2$ , and degassed via the freeze-pump-thaw method.  $\text{NHC}^{\text{Me}_4}$  (1,3,4,5-tetramethylimidazolin-2-ylidene)<sup>1</sup> and  $\text{KC}_8$ <sup>2</sup> were synthesized according to the literature procedures. Melting points were determined in closed NMR tubes under argon atmosphere and are reported without correction. We note that both elemental analyses and HRMS were carried out for all new compounds, but in some cases, they decomposed too rapidly and only one of these analyses was possible.

## 1.2. Synthetic procedures

### Synthesis of $\text{NHC}^{\text{Me}_4} \cdot \text{AlH}_3$

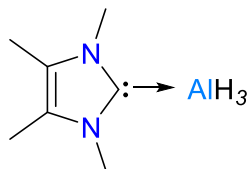

$\text{NHC}^{\text{Me}_4} \cdot \text{AlH}_3$  was synthesized by a modified literature procedure.<sup>3</sup>  $\text{NHC}^{\text{Me}_4}$  (2.00 g, 16.1 mmol) was added to a dry Schlenk flask and the flask was cooled to  $-78\text{ }^\circ\text{C}$ . Aluminium hydride *N,N*-dimethylethylamine complex solution (32.2 mL, 16.1 mmol, 0.5 M in toluene) was added to the flask. After addition, the solution was stirred at  $-78\text{ }^\circ\text{C}$  for 1 h, followed by stirring for 2 h at room temperature. The solution was then evaporated to dryness and the residue was washed with 10 mL of cold dry hexanes to obtain a white powder. Isolated yield: 2.35 g (95%).  $^1\text{H}$  NMR (400 MHz,  $\text{C}_6\text{D}_6$ , 298 K):  $\delta = 1.09$  (s, 6H,  $\text{CH}_3\text{-C-C-CH}_3$ ,  $\text{NHC}^{\text{Me}_4}$ ), 3.15 (s, 6H, N- $\text{CH}_3$ ), 4.45 (br, s  $\text{AlH}_2$ , FWHM: 779 Hz) ppm.  $^{13}\text{C}\{^1\text{H}\}$  NMR (100 MHz,  $\text{C}_6\text{D}_6$ , 298 K):  $\delta = 8.1$  (2C,  $\text{CH}_3\text{-C-C-CH}_3$ ,  $\text{NHC}^{\text{Me}_4}$ ), 34.0 (2C, N- $\text{CH}_3$ ,  $\text{NHC}^{\text{Me}_4}$ ), 125.7 (2C,  $\text{CH}_3\text{-C-C-CH}_3$ ,  $\text{NHC}^{\text{Me}_4}$ ) ppm.  $^{27}\text{Al}\{^1\text{H}\}$  NMR (78.2 MHz,  $\text{C}_6\text{D}_6$ , 298 K):  $\delta = 106.5$  (br) ppm.

*Note: Traces of unknown impurities were detected in the  $^1\text{H}$  NMR spectrum, however, the product was nevertheless used for the next step.*

## Synthesis of **1**

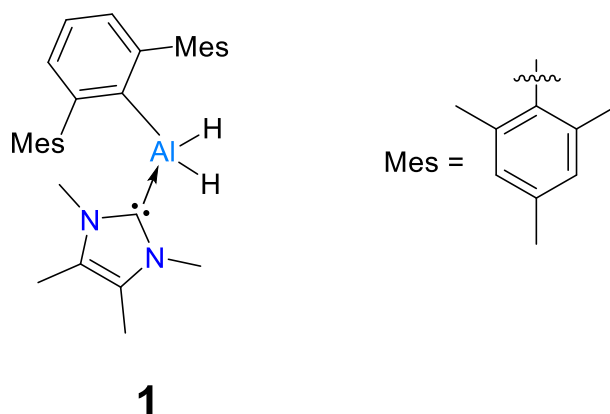

**NHC<sup>Mes4</sup>·AlH<sub>3</sub>** (1.00 g, 6.49 mmol) and **TerLi·Et<sub>2</sub>O** (3.20 g, 8.05 mmol; Ter = 2,6-C<sub>6</sub>H<sub>3</sub>Mes<sub>2</sub>, Mes = 1,3,5-C<sub>6</sub>H<sub>2</sub>Me<sub>3</sub>) were added to a dry Schlenk flask, and the flask was cooled to  $-78\text{ }^{\circ}\text{C}$  followed by addition of 200 mL of toluene. The reaction mixture was then warmed to room temperature for 3 h, followed by 12 h of stirring at room temperature. After completion of the reaction (confirmed by <sup>1</sup>H NMR spectroscopy) the volatiles were evaporated and the resulting solid was washed with 20 mL of cold hexanes. X-ray quality crystals of the product were grown from a saturated toluene solution at  $-20\text{ }^{\circ}\text{C}$  overnight. Yield: 2.1 g (70%). M.P.:  $> 200\text{ }^{\circ}\text{C}$ ; <sup>1</sup>H NMR (400 MHz, C<sub>6</sub>D<sub>6</sub>, 298 K):  $\delta = 1.15$  (s, 6H, CH<sub>3</sub>-C-C-CH<sub>3</sub>, NHC<sup>Mes4</sup>), 2.13 (s, 6H, CH<sub>3</sub>, Mes), 2.31 (s, 12H, CH<sub>3</sub>, Mes), 2.91 (s, 6H, N-CH<sub>3</sub>, NHC<sup>Mes4</sup>), 4.04 (br, s AlH<sub>2</sub>, FWHM: 258 Hz), 6.76 (s, 4H, Ar-H), 7.08 (s, 1H, Ar-H), 7.407 (t, <sup>3</sup>J = 7.6 Hz, 1H, Ar-H) ppm. <sup>13</sup>C{<sup>1</sup>H} NMR (100 MHz, C<sub>6</sub>D<sub>6</sub>, 298 K):  $\delta = 8$  1 (2C, CH<sub>3</sub>-C-C-CH<sub>3</sub>, NHC<sup>Mes4</sup>), 21.6 (4C, CH<sub>3</sub>, Mes), 21.9 (2C, CH<sub>3</sub>, Mes), 34.2 (N-CH<sub>3</sub> from NHC<sup>Mes4</sup>), 124.5 (2C, CH<sub>3</sub>-C-C-CH<sub>3</sub>), 127.0 (2C, Ar-CH), 127.9 (1C, Ar-CH), 128.3 (3C, Ar-CH), 128.7 (1C, Ar-CH), 135.2 (1C, Ar-C<sub>q</sub>), 136.6 ((1C, Ar-C<sub>q</sub>), 144.5 (1C, Ar-C<sub>q</sub>), 151.8 (1C, Ar-C<sub>q</sub>). *We did not find peaks for the carbene carbon or the quaternary carbon nuclei attached to aluminium due to quadrupolar broadening by the Al nucleus.* <sup>27</sup>Al{<sup>1</sup>H} NMR (78.2 MHz, C<sub>6</sub>D<sub>6</sub>, 298 k):  $\delta = 112.4$  (br) ppm. FT-IR (KBr, cm<sup>-1</sup>):  $\bar{\nu}$  (cm<sup>-1</sup>) = 3035 (w), 2961 (w), 2906 (w), 2860 (w), 1770 (s, Al-H), 1750 (s, Al-H), 1443 (ms), 1231 (w), 1158 (w), 1102 (mw), 1028 (mw), 844 (m), 771 (s), 716 (vs), 651 (s), 568 (m). Elemental analysis: calcd. for (C<sub>31</sub>H<sub>39</sub>AlN<sub>2</sub>): C, 79.79; H, 8.42; N, 6.00; found: C, 79.68; H, 8.31; N, 6.02. HRMS LIFDI for [C<sub>31</sub>H<sub>39</sub>AlN<sub>2</sub>]<sup>+</sup> = [M]<sup>+</sup>: calcd. 466.2929; found 466.2920.

## Synthesis of **2**

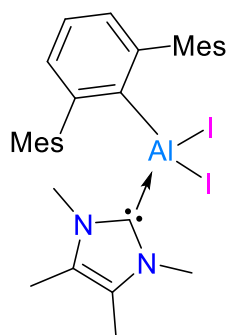

**2**

**2** was synthesized by a modified literature procedure.<sup>4</sup> **1** (1.10 g, 2.30 mmol) was taken in a dry Schlenk and dissolved in 200 mL toluene. The mixture was then cooled to 0 °C followed by addition of iodomethane (1 mL, 16.5 mmol). It was afterward fitted with an oil bubbler to allow release of byproduct methane and stirred for 12 h at room temperature. After completion of the reaction (as confirmed by <sup>1</sup>H NMR spectroscopy), the volatiles were evaporated and solid was washed with 30 mL of cold hexanes to obtain white powder of the product. Yield: 1.2 g (80%). X-ray quality single crystals were grown from a saturated toluene solution at –30 °C overnight. **M.P.:** 190 °C (color change starts at 160 °C, decomposed); <sup>1</sup>H NMR (400 MHz, C<sub>6</sub>D<sub>6</sub>, 298 K):  $\delta$  = 1.10 (s, 6H, CH<sub>3</sub>-C-C-CH<sub>3</sub>, NHC<sup>Me4</sup>), 2.16 (s, 6H, s, 6H, CH<sub>3</sub>, Mes), 2.24 (s, 12H, CH<sub>3</sub>, Mes), 3.03 (s, 6H, N-CH<sub>3</sub>, NHC<sup>Me4</sup>), 6.76 (s, 4H, Ar-H, Mes), 6.94 (s, br, 1H, Ar-H), 6.96 (s, br, 1H, Ar-H), 7.28 (t, <sup>3</sup>J = 8 Hz, 1H, Ar-H) ppm. <sup>13</sup>C{<sup>1</sup>H} NMR (100 MHz, C<sub>6</sub>D<sub>6</sub>, 298 K):  $\delta$  = 8.2 (2C, CH<sub>3</sub>-C-C-CH<sub>3</sub>, NHC<sup>Me4</sup>), 21.6 (2C, CH<sub>3</sub>, Mes), 21.8 (4C, CH<sub>3</sub>, Mes), 36.7 (N-CH<sub>3</sub> from NHC<sup>Me4</sup>), 125.6 (2C, CH<sub>3</sub>-C-C-CH<sub>3</sub>), (1C, Ar-CH), 128.9 (3C, Ar-CH), 129.1 (2C, Ar-CH), 129.5 (1C, Ar-CH), 134.5 (1C, Ar-C<sub>q</sub>), 136.5 (1C, Ar-C<sub>q</sub>), 137.3 (1C, Ar-C<sub>q</sub>), 142.3 (1C, Ar-C<sub>q</sub>), 151.5 (1C, Ar-C<sub>q</sub>) ppm. *We did not find peaks for the carbene carbon or quaternary carbon nucleus attached to aluminium, or any <sup>27</sup>Al{<sup>1</sup>H} NMR signal, due to quadrupolar broadening by the Al nucleus.* FT-IR (KBr, cm<sup>-1</sup>):  $\bar{\nu}$  (cm<sup>-1</sup>) = 2958 (mw), 2924 (mw), 2855 (w), 1676 (w), 1622 (w), 1552 (w), 1442 (s), 1372 (s), 1276 (s), 1111 (ms), 1014 (s), 861 (vs), 807 (vs), 752 (S), 683 (ms), 558 (w), 448 (s). Elemental analysis: calcd. for (C<sub>31</sub>H<sub>37</sub>AlI<sub>2</sub>N<sub>2</sub>): C, 51.83; H, 5.19; N, 3.90; found: C, 51.93; H, 5.19; N, 3.90.

### Synthesis of **3**:

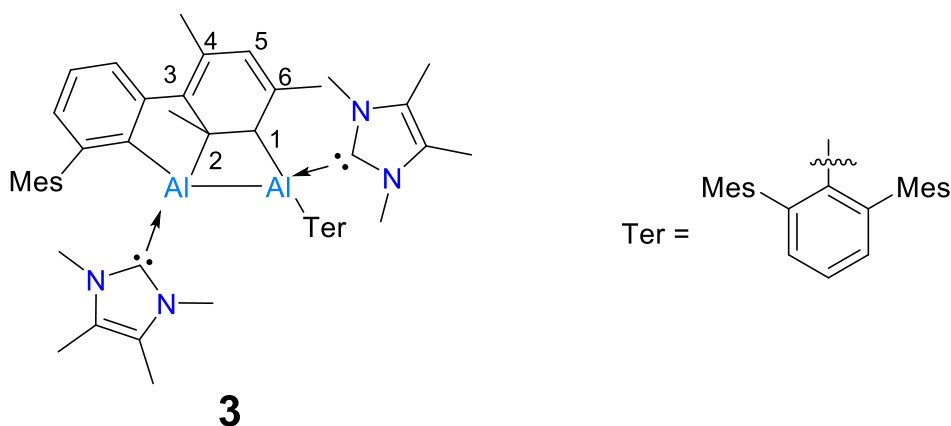

**Route a:** Inside a glove box, dry benzene (10 mL) was added to a vial containing **2** (0.50 g, 0.70 mmol, 0.07 M solution) and freshly prepared potassium graphite (0.38 g, 2.80 mmol) at room temperature. The mixture was stirred vigorously for 17 h at room temperature. The  $^1\text{H}$  NMR spectrum of the solution showed consumption of the starting material **2** and the appearance of signals corresponding to **3** (64%) and **4** (36%). All the volatiles were removed under a high vacuum to obtain a yellow solid. The yellow solid was first extracted with hexanes (15 mL), and the remaining solid was extracted with benzene (10 mL). Overnight a white crystalline solid precipitated from the hexanes solution, filtered, and washed with cold hexanes ( $-40\text{ }^\circ\text{C}$ ) to obtain **4**. From the benzene solution, yellow crystals of **3** were precipitated after 2 d, which were separated and washed with hexanes. Yield of **3**: 65 mg (20%); yield of **4**: 15 mg (5%).

**Route b:** Inside a glove box, **2** (0.30 g, 0.42 mmol, 0.04 M solution in toluene) and freshly prepared potassium graphite (0.28 g, 2.10 mmol) were taken in a vial and stirred vigorously for 17 h at room temperature. A  $^1\text{H}$  NMR spectrum of the mixture showed consumption of starting material **2** and the appearance of signals corresponding to **3** (67%) and **5** (28%). The solution was filtered and evaporated to obtain a yellow solid, extracted with hexanes ( $7\text{ mL} \times 2$ ), and left to crystallize at  $-35\text{ }^\circ\text{C}$ . The remaining solid was then extracted with 10 mL of benzene, concentrated to ca. 5 mL, and then left to crystallize at RT. The white crystalline compound **5** precipitated from hexanes overnight and was washed with cold ( $-40\text{ }^\circ\text{C}$ ) hexanes. Slow evaporation of the benzene solution gave bright yellow crystals of **3**. Yield of **3**: 78 mg (40%); yield of **5**: 6 mg (3%).

*Note: The remaining benzene solution after separation of 3 contains both 3 and 4/5. They have similar solubilities (a few crystals of 3 are occasionally found to grow from the hexanes solution), so it is not easy to separate pure 3 and 4/5 in good yields as indicated by <sup>1</sup>H NMR spectroscopy.*

**Route c:** **2** (1.00 g, 1.39 mmol) and freshly prepared potassium graphite (0.94 g, 6.90 mmol) were added to a dry Schlenk flask, and the mixture was cooled to  $-78$  °C followed by the addition of 15 mL of toluene. The mixture was slowly warmed to room temperature over 4 h with continuous stirring and stirred for 6 h at room temperature. The <sup>1</sup>H NMR spectrum of the crude reaction mixture showed consumption of **2** and almost exclusively the appearance of signals of **3**. The solution was filtered and evaporated to obtain a yellow solid, which was then washed with a mixture of cold (0 °C) benzene (1 mL) and hexanes (10 mL), providing a pure yellow solid (**3**). Yield: 450 mg (70%).

**Route d:** Inside a glove box, dry hexanes (15 mL) was added to a vial containing **2** (0.30 g, 0.42 mmol) and freshly prepared potassium graphite (0.28 g, 2.10 mmol) at room temperature. The reaction mixture was then stirred vigorously for 20 d at room temperature. A <sup>1</sup>H NMR spectrum of the resulting mixture showed complete consumption of the starting material **2** and the exclusive presence of signals of **3**. The solution was then evaporated, and the solid was washed with 5 mL of cold hexanes to obtain a bright yellow solid (**3**). Yield: 195 mg (90%).

**M.P.:** 170 °C (decomposition); <sup>1</sup>H NMR (400 MHz, C<sub>6</sub>D<sub>6</sub>, 298 K):  $\delta$  = 0.70 (s, 1H, Al-CH) 1.21 (s, 3H, CH<sub>3</sub> attached C<sup>2</sup>), 1.22 (s, 3H, CH<sub>3</sub>-C-C-CH<sub>3</sub>, NHC<sup>Me4</sup>), 1.41 (s, 6H, CH<sub>3</sub>-C-C-CH<sub>3</sub>, NHC<sup>Me4</sup>), 1.47 (s, 3H, CH<sub>3</sub>, CH<sub>3</sub>-C-C-CH<sub>3</sub>, NHC<sup>Me4</sup>), 1.59 (s, 3H, CH<sub>3</sub>, Mes), 1.61 (s, 3H, CH<sub>3</sub>, Mes), 1.79 (s, 6H, CH<sub>3</sub>, Mes), 2.01 (s, 3H, CH<sub>3</sub>, Mes), 2.02 ((s, 3H, CH<sub>3</sub>, Mes), 2.20 (s, 3H, CH<sub>3</sub>, Mes), 2.36 (s, 3H, CH<sub>3</sub>, Mes), 2.41 (s, 3H, CH<sub>3</sub>, Mes), 2.49 (s, 3H, CH<sub>3</sub>, Mes), 2.61 (s, 3H, CH<sub>3</sub>, Mes), 2.83 (s, 3H, N-CH<sub>3</sub>, NHC<sup>Me4</sup>), 2.96 (s, 3H, N-CH<sub>3</sub>, NHC<sup>Me4</sup>), 3.26 (s, 3H, N-CH<sub>3</sub>, NHC<sup>Me4</sup>), 3.29 (s, 3H, N-CH<sub>3</sub>, NHC<sup>Me4</sup>), 5.14 (s, 1H, vinylic C-H, C<sup>5</sup>), 6.22 (s, 1H, Ar-H), 6.33 (s, 1H, Ar-H), 2.56 (s, 1H, Ar-H), 6.73 (s, 1H, Ar-H), 6.87-6.91 (m, 3H, Ar-H), 7.07-7.09 (m, 1H, Ar-H), 7.28 (t, <sup>3</sup>J = 7.6 Hz, 1H, Ar-H), 7.34-7.36 (m, 2H, Ar-H), 7.72 (d, <sup>3</sup>J = 7.6 Hz, 1H, Ar-H) ppm. <sup>13</sup>C {<sup>1</sup>H} NMR (100 MHz, C<sub>6</sub>D<sub>6</sub>, 298 K):  $\delta$  = 8.4 (4C, CH<sub>3</sub>-C-C-CH<sub>3</sub>, NHC<sup>Me4</sup>), 20.44 (1C, CH<sub>3</sub>, Mes), 20.9 (1C, CH<sub>3</sub>, Mes), 21.5 (2C, CH<sub>3</sub>, Mes), 21.6 (1C, CH<sub>3</sub>, Mes), 21.8 (1C, CH<sub>3</sub>, Mes), 21.9 (1C, CH<sub>3</sub>, Mes), 22.3 (1C, CH<sub>3</sub>, Mes), 23.2 (1C, CH<sub>3</sub>, Mes), 24.0 (1C, CH<sub>3</sub>, Mes), 25.4 (1C, CH<sub>3</sub> attached C<sup>2</sup>), 27.1 (1C, CH<sub>3</sub>, Mes), 34.5 (1C, N-CH<sub>3</sub>, NHC<sup>Me4</sup>), 35.4 (1C, N-CH<sub>3</sub>, NHC<sup>Me4</sup>), 35.7 (1C, N-CH<sub>3</sub>, NHC<sup>Me4</sup>), 35.9 (1C, N-CH<sub>3</sub>, NHC<sup>Me4</sup>),



115.9 (1C, =CH), 123.4 (1C, Ar-CH), 124.5 (1C, Ar-CH), 126.2 (1C, Ar-CH), 126.6 (1C, Ar-CH), 127.1 (1C, Ar-CH), 127.2 (1C, Ar-CH), 127.3 (1C, Ar-CH), 128.0 (1C, Ar-CH), 128.3 (1C, Ar-CH), 128.5 (1C, Ar-CH), 128.9 (1C, Ar-CH), 129.7 (1C, Ar-CH), 121.4 (4C, CH<sub>3</sub>-C-C-CH<sub>3</sub>, NHC<sup>Me</sup><sub>4</sub>), 124.3 (1C, Ar-C<sub>q</sub>), 124.7 (2C, Ar-C<sub>q</sub>), 133.7 (1C, Ar-C<sub>q</sub>), 133.8 (1C, Ar-C<sub>q</sub>), 134.5 (1C, Ar-C<sub>q</sub>), 135.2 (1C, Ar-C<sub>q</sub>), 135.3 (1C, Ar-C<sub>q</sub>), 135.9 (1C, Ar-C<sub>q</sub>), 136.2 (1C, Ar-C<sub>q</sub>), 136.5 (1C, Ar-C<sub>q</sub>), 136.5 (1C, Ar-C<sub>q</sub>), 140.0 (1C, Ar-C<sub>q</sub>), 145.3 (1C, Ar-C<sub>q</sub>), 146.3 (1C, Ar-C<sub>q</sub>), 146.5 (1C, Ar-C<sub>q</sub>), 147.4 (1C, Ar-C<sub>q</sub>), 149.8 (1C, Ar-C<sub>q</sub>), 151.6 (1C, Ar-C<sub>q</sub>), 152.9 (1C, Ar-C<sub>q</sub>), 226.5 (2C, Ar-C<sub>q</sub>), 244.9 (2C, Ar-C<sub>q</sub>) ppm. The allylic carbon nucleus was obscured due to quadrupolar broadening by the Al nucleus. FT-IR (KBr, cm<sup>-1</sup>):  $\bar{\nu}$  (cm<sup>-1</sup>) = 1656 (w), 1616 (w), 1578 (w), 1547 (w), 1432 (s), 1362 (m), 1239 (w), 1162 (w), 1108 (w), 1077 (w), 1024 (w), 954 (w), 884 (w), 854 (s), 785 (m), 730 (s). UV/Vis  $\lambda_{\text{max}}$  = 303, 369 nm. Elemental analysis: calcd. for (C<sub>62</sub>H<sub>74</sub>Al<sub>2</sub>N<sub>4</sub>): C, 80.14; H, 8.03; N, 6.03. found: C, 79.82; H, 8.17; N, 6.06. HRMS LIFDI for [C<sub>62</sub>H<sub>74</sub>Al<sub>2</sub>N<sub>4</sub>]<sup>+</sup> = [M]<sup>+</sup>: calcd. 928.5544; found 928.5539.

*Note: The solubility of 3 is not good enough to obtain a high-resolution <sup>13</sup>C{<sup>1</sup>H} NMR spectrum. We used a 400 MHz instrument and recorded 10,000 scans, yet the S/N ratio of the <sup>13</sup>C nuclei did not improve.*

#### Synthesis of 4:

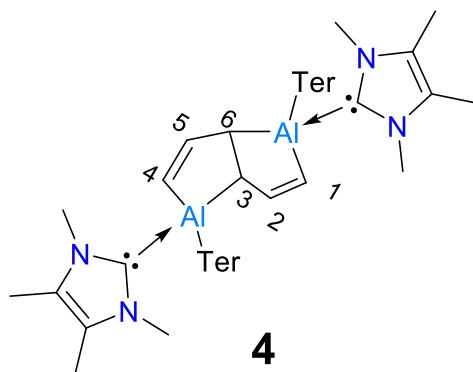

Compound **4** was prepared as a byproduct of the synthesis of **3** via **Route a**. X-ray quality single crystals of **4** were grown from the crude saturated reaction mixture in benzene.

*Note: Although the reaction was performed in benzene, crystalline 4 is not very soluble in benzene and is unstable in this solvent. The compound started to decompose within 3-4 h upon standing in C<sub>6</sub>D<sub>6</sub>. Thus, we provide only selected signals for the <sup>13</sup>C NMR spectroscopic data based on 2D NMR spectra.*

M.P.: 175 °C (decomposition); <sup>1</sup>H NMR (400 MHz, C<sub>6</sub>D<sub>6</sub>, 298 K): 1.06 (s, 2H, bridging CH, C<sup>3</sup> & C<sup>6</sup>), 1.22 (s, 18H, 12H from CH<sub>3</sub>-C-C-CH<sub>3</sub>, NHC<sup>Me</sup><sub>4</sub>, 6H from CH<sub>3</sub> of Mes), 1.86 (s, 12H,

$CH_3$  of Mes), 2.29 (s, 12H,  $CH_3$  of Mes), 2.38 (s, 12H, 6H from  $CH_3$  of Mes, and 6H from N- $CH_3$  of  $NHC^{Me_4}$ ), 2.51 (br, 6H, N- $CH_3$  of  $NHC^{Me_4}$ ), 5.01 (d,  $^3J = 12$  Hz, 2H,  $C^{1,4}$ -H), 6.79 (s, 4H, Ar-H), 6.88 (s, 4H, Ar-H), 6.94 (s, 2H, Ar-H), 6.96 (s, 2H, Ar-H), 7.26-7.30 (m, 2H, Ar-H), 7.32 (br, 1H,  $C^{2/5}$ ), 7.33 (s, 1H,  $C^{2/5}$ -H) ppm.  $^{13}C\{^1H\}$  NMR (100 MHz,  $C_6D_6$ , 298 K) selected signals:  $\delta = 8.5$  (4C,  $CH_3$ -C-C- $CH_3$ ,  $NHC^{Me_4}$ ), 21.4 (1C,  $CH_3$ , Mes), 21.8 (1C,  $CH_3$ , Mes), 22.5 (1C,  $CH_3$ , Mes), 123.7 (4C,  $CH_3$ -C-C- $CH_3$ ,  $NHC^{Me_4}$ ), 127.7 (Ar-CH), 127.9 (Ar-CH), 128.2 (Ar-CH), 128.4 (Ar-CH), 128.5 (Ar-CH), 128.7 (Ar-CH), 128.9 (Ar-CH), 129.0 (Ar- $C_q$ ), 135.0 (Ar- $C_q$ ), 137.2 (Ar- $C_q$ ), 144.8 (Ar- $C_q$ ), 151.3 (Ar- $C_q$ ) ppm. FT-IR (KBr,  $cm^{-1}$ ):  $\bar{\nu}$  ( $cm^{-1}$ ) = 1650 (w), 1604 (w), 1546 (w), 1504 (s), 1440 (w), 1378 (m), 1217 (w), 1174 (vw), 1100 (w), 1032 (m), 946 (s), 860 (s), 804 (s), 730 (s), 607 (m), 557 (m), 502 (s), 460 (vs). Elemental analysis: calcd. for  $(C_{68}H_{80}Al_2N_4)^+$ : C, 81.08; H, 8.00; N, 5.56. found: C, 80.64; H, 8.04; N, 5.43.

HRMS LIFDI for  $[C_{68}H_{80}Al_2N_4]^+ = [M]^+$ : calcd. 1006.6014; found 1006.6008

### Synthesis of **5**:

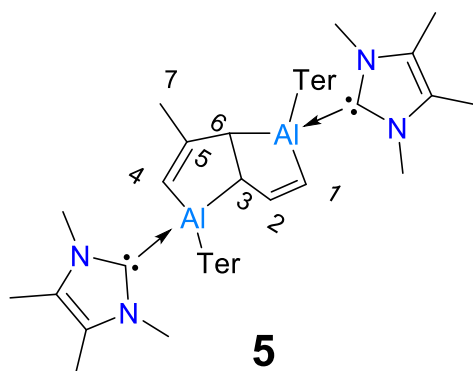

Compound **5** was prepared as a byproduct from the synthesis of **3** via **Route b**. X-ray quality single crystals of **5** were grown from a saturated benzene solution. **5** is relatively stable at room temperature in benzene solution. We observed an intractable decomposition product in the  $^1H$  NMR spectrum after 48 h at room temperature. M.P.: 180 °C (decomposition);  $^1H$  NMR (400 MHz,  $C_6D_6$ , 298 K): 1.28 (br, s, 6H,  $CH_3$ -C-C- $CH_3$ ,  $NHC^{Me_4}$ ), 1.31 (s, 6H,  $CH_3$ -C-C- $CH_3$ ,  $NHC^{Me_4}$ ), 1.42 (br, 2H, bridging CH,  $C^3$  &  $C^6$ ), 1.79 (s,  $CH_3$  from  $C^7$ ), 1.88 (s, 6H,  $CH_3$ , Mes), 1.94 (s, 6H,  $CH_3$ , Mes), 2.31 (s, 6H,  $CH_3$ , Mes), 2.32 (s, 6H,  $CH_3$ , Mes), 2.37 (s, 6H,  $CH_3$ , Mes), 2.40 (s, 6H,  $CH_3$ , Mes), 2.62 (s, br, 12H, N- $CH_3$ ,  $NHC^{Me_4}$ ), 4.83 (s, 1H,  $C^4$ -H), 5.01 (dd,  $^3J = 12$  Hz,  $^4J = 2$  Hz, 1H,  $C^1$ -H), 6.82-6.86 (m, 6H, Ar-H), 6.91 (br, s, 2H, Ar-H), 6.95-6.99 (m, 4H, Ar-H), 7.29 (t, 2H,  $^3J = 7.6$  Hz, Ar-H), 7.34 (1H, dd,  $^3J = 12$  Hz,  $^3J = 3.6$  Hz, CH of  $C^2$ )

ppm.  $^{13}\text{C}\{^1\text{H}\}$  NMR (100 MHz,  $\text{C}_6\text{D}_6$ , 298 K):  $\delta$  = 8.5 (4C,  $\text{CH}_3\text{-C-C-CH}_3$ ,  $\text{NHC}^{\text{Me}_4}$ ), 21.2 (1C,  $\text{CH}_3$ , Mes), 21.4 (1C,  $\text{CH}_3$ , Mes), 21.7 (1C,  $\text{CH}_3$ , Mes), 21.8 (1C,  $\text{CH}_3$ , Mes), 22.6 (1C,  $\text{CH}_3$ , Mes), 23.0 (1C,  $\text{CH}_3$ , Mes), 30.4 ( $\text{CH}_3$  of  $\text{C}^7$ ), 34.33 (4C, N- $\text{CH}_3$ ,  $\text{NHC}^{\text{Me}_4}$ ), 124.0 (4C,  $\text{CH}_3\text{-C-C-CH}_3$ ,  $\text{NHC}^{\text{Me}_4}$ ), 126.9 (CH,  $\text{C}^2$ ), 127.0 (CH  $\text{C}^1$ ), 127.7 (1C, Ar-CH) 127.9 (1C, Ar-CH), 128.0 (2C, Ar-CH), 128.1 (2C, Ar-CH), 128.7 (3C, Ar-CH), 128.93 (1C, Ar-CH), 128.97 (2C, Ar-CH), 129.05 (2C, Ar-CH), 164.32 (CH,  $\text{C}^3$ ). Signals for  $\text{C}^4$  and  $\text{C}^6$  were not observed due to quadrupolar broadening by the Al nucleus. 128.4 (Ar- $\text{C}_q$ ), 128.5 (Ar- $\text{C}_q$ ), 128.7 (Ar- $\text{C}_q$ ), 134.9 (Ar- $\text{C}_q$ ), 135.0 (Ar- $\text{C}_q$ ), 137.0 (Ar- $\text{C}_q$ ), 137.2 (Ar- $\text{C}_q$ ), 137.3 (Ar- $\text{C}_q$ ), 144.9 (Ar- $\text{C}_q$ ), 151.2 (Ar- $\text{C}_q$ ), 151.3 (Ar- $\text{C}_q$ ), 172.5 (C- $\text{CH}_3$ ,  $\text{C}^5$ ) ppm. FT-IR (KBr,  $\text{cm}^{-1}$ ):  $\bar{\nu}$  ( $\text{cm}^{-1}$ ) = 1654 (mw), 1602 (mw), 1516 (s), 1446 (s), 1368 (s), 1255 (m), 1195 (w), 1152 (w), 1082 (m), 1056 (s), 1030 (s), 883 (w), 840 (s), 797 (s), 743(s), 683(s), 614 (w), 553 (s), 450 (vs). Elemental analysis: calcd. for ( $\text{C}_{69}\text{H}_{82}\text{Al}_2\text{N}_4$ ): C, 81.14; H, 8.09; N, 5.49; found: C, 81.72; H, 8.10; N, 5.45. HRMS LIFDI for [ $\text{C}_{69}\text{H}_{82}\text{Al}_2\text{N}_4$ ] $^+ = [\text{M}]^+$ : calcd. 1020.6170; found 1020.6165.

### Synthesis of 8:

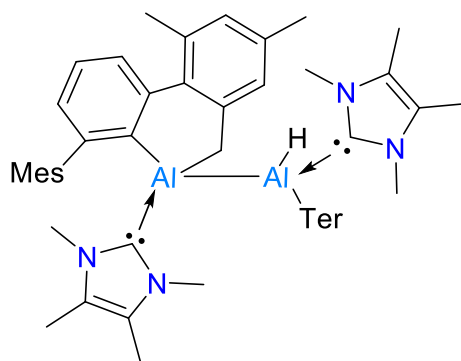

**8**

**3** (0.03 g, 0.03 mmol) was added to a sealable NMR tube with 0.7 mL of benzene. The reaction mixture was then heated at 100 °C for 24 h. The  $^1\text{H}$  NMR spectrum of the mixture showed complete consumption of **3**. The solution was then filtered and left to crystallize by slow diffusion of pentane or hexanes. A small sample of colorless crystals of **4** emerged overnight. After separating these crystals of **4** the solution was allowed to evaporate slowly to obtain **8** as colorless crystals. Yield: 20.0 mg (70%) isolated. M.P.: >200 °C (decomposition);  $^1\text{H}$  NMR (400 MHz,  $\text{C}_6\text{D}_6$ , 298 K):  $\delta$  = 1.44 (s, 3H,  $\text{CH}_3\text{-C-C-CH}_3$ ,  $\text{NHC}^{\text{Me}_4}$ ), 1.47 (s, 9H,  $\text{CH}_3\text{-C-C-CH}_3$ ,  $\text{NHC}^{\text{Me}_4}$ ), 1.55 (s, 3H,  $\text{CH}_3$ , Mes), 1.68 (br, 2H,  $\text{CH}_2$ ), 1.88 (3H,  $\text{CH}_3$ , Mes), 2.06 (s, 9H,  $\text{CH}_3$ , Mes), 2.15 (s, 3H,  $\text{CH}_3$ , Mes), 2.29 (s, 6H,  $\text{CH}_3$ , Mes), 2.52 (s, 9H,  $\text{CH}_3$ , Mes), 2.98 (s, 9H, N-

CH<sub>3</sub>, NHC<sup>Me4</sup>), 3.26 (s, 3H, N-CH<sub>3</sub>, NHC<sup>Me4</sup>), 4.41 (1H, Al-H), 6.22 (s, 2H, Ar-H), 6.40 (s, 1H, Ar-H), 6.64-6.67 (m, 2H, Ar-H), 6.90 (s, 2H, Ar-H), 6.92 (s, 2H, Ar-H), 7.04-7.11 (s, 2H, Ar-H), 7.15- 7.19 (m, 2H, Ar-H), 7.24 (t, <sup>3</sup>J = 7.5 Hz, 1H, Ar-H) ppm. <sup>13</sup>C {<sup>1</sup>H} NMR (100 MHz, C<sub>6</sub>D<sub>6</sub>, 298 K): δ = 8.8 (4C, CH<sub>3</sub>-C-C-CH<sub>3</sub>, NHC<sup>Me4</sup>), 21.3 (1C, CH<sub>3</sub>, Mes), 21.6 (2C, CH<sub>3</sub>, Mes), 21.7 (2C, CH<sub>3</sub>, Mes), 21.9 (1C, CH<sub>3</sub>, Mes), 22.4 (1C, CH<sub>3</sub>, Mes), 23.2 (1C, CH<sub>3</sub>, Mes), 23.4 (CH<sub>2</sub>), 34.5 (3C, CH<sub>3</sub>, Mes), 34.8 (2C, N-CH<sub>3</sub>, NHC<sup>Me4</sup>), 36.7 (2C, N-CH<sub>3</sub>, NHC<sup>Me4</sup>), 124.1 (4C, CH<sub>3</sub>-C-C-CH<sub>3</sub>, NHC<sup>Me4</sup>), 125.1 (1C, Ar-CH), 126.2 (1C, Ar-CH), 126.4 (1C, Ar-CH), 126.5 (1C, Ar-CH), 127.0 (1C, Ar-CH), 127.2 (1C, Ar-CH), 127.7 (2C, Ar-CH), 128.0 (1C, Ar-CH), 128.7 (2C, Ar-CH), 128.8 (1C, Ar-CH), 128.9 (1C, Ar-CH), 129.4 (1C, Ar-CH), 126.9 (Ar-C<sub>q</sub>), 127.0 (Ar-C<sub>q</sub>), 127.2 (Ar-C<sub>q</sub>), 128.3 (Ar-C<sub>q</sub>), 128.5 (Ar-C<sub>q</sub>), 128.7 (Ar-C<sub>q</sub>), 133.4 (Ar-C<sub>q</sub>), 133.5 (Ar-C<sub>q</sub>), 133.7 (Ar-C<sub>q</sub>), 134.2 (Ar-C<sub>q</sub>), 135.8 (Ar-C<sub>q</sub>), 136.1 (Ar-C<sub>q</sub>), 139.1 (Ar-C<sub>q</sub>), 149.1 (Ar-C<sub>q</sub>), 149.6 (Ar-C<sub>q</sub>) ppm. FT-IR (KBr, cm<sup>-1</sup>): ν̄ (cm<sup>-1</sup>) = 1694 (m), 1663 (w), 1616 (m), 1578 (w), 1440 (s), 1378 (s), 1085 (w), 1054 (w), 1031 (s), 861 (m), 799 (s), 723 (s). Elemental analysis: calcd. for (C<sub>62</sub>H<sub>74</sub>Al<sub>2</sub>N<sub>4</sub>·C<sub>5</sub>H<sub>12</sub>): C, 80.36; H, 8.66; N, 5.59; found: C, 80.27; H, 8.62; N, 5.61.

HRMS LIFDI for [C<sub>62</sub>H<sub>74</sub>Al<sub>2</sub>N<sub>4</sub>]<sup>+</sup> = [M]<sup>+</sup>: calcd. 928.5544; found 928.5512.

#### **Reduction of 2 in dilute benzene solutions:**

In a glove box, dry benzene (15 mL) was added to a vial containing **2** (0.24 g, 0.32 mmol, 0.02 molar solution) and freshly prepared potassium graphite (0.22 g, 1.60 mmol) at room temperature, and the mixture was stirred vigorously for 17 h at room temperature. The <sup>1</sup>H NMR spectrum of the resulting mixture showed consumption of the starting material **2** and the presence of signals for **3** (35%) and **4** (65%). The reaction mixture was repeatedly washed with hexanes (3×5 mL) and left to crystallize. After two days, compound **4** was isolated from this mixture (11 mg; 7%).

*Note: Longer reaction times led to the formation of unidentified side products. The reaction in dilute toluene did not increase the formation of 5 but instead increased the formation of unidentified side products.*

#### **Reduction of 2 in dilute hexanes solutions:**

In a glove box, dry hexanes (20 mL) was added to a vial containing **2** (0.05 g, 0.07 mmol) and freshly prepared potassium graphite (0.285 g, 2.1 mmol) at room temperature. Then reaction suspension was stirred vigorously for 20 days at room temperature. A <sup>1</sup>H NMR spectrum of the resulting mixture showed consumption of all starting materials and the presence of signals of **3**

along with some unidentified side products. The solution was then evaporated, and the solid was washed with 3 mL of cold hexanes to obtain a bright yellow solid (**3**). Yield: 24 mg (75%).

In this case, we got very few crystals of **8** from the hexanes wash.

*Note: The molarity of the reaction mixture could not be determined as compound **2** is not fully soluble in hexanes.*

### 1.3. NMR spectra

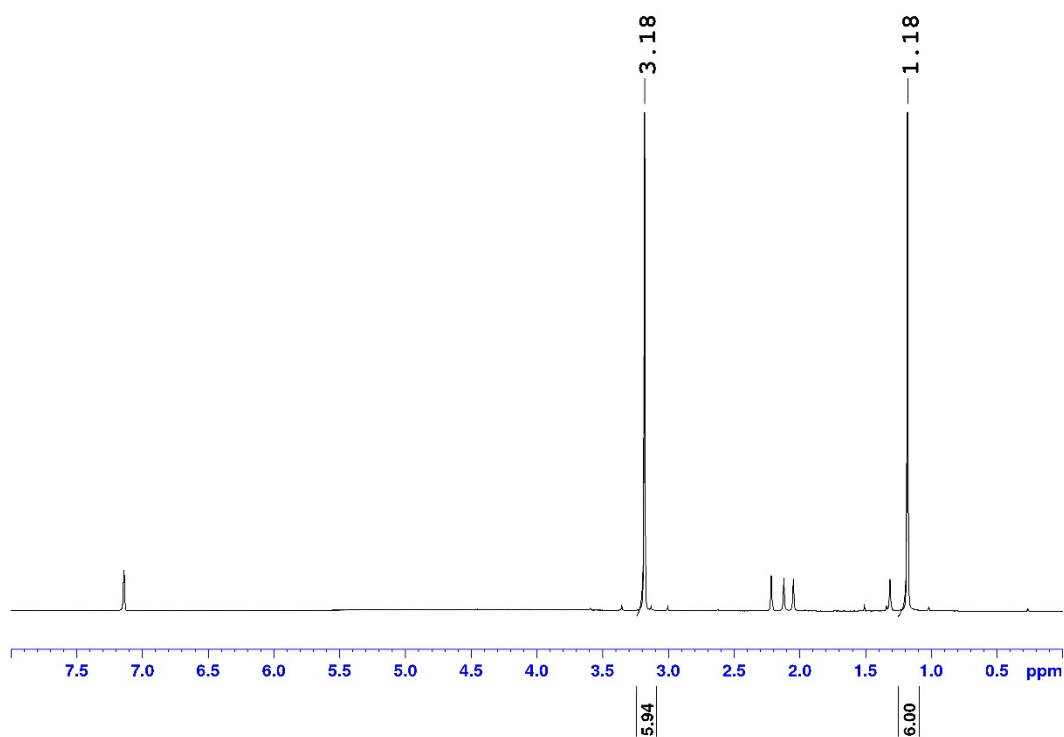

**Figure S1.**  $^1\text{H}\{^{27}\text{Al}\}$  NMR spectrum of  $\text{NHC}^{\text{Me}_4}\cdot\text{AlH}_3$  in  $\text{C}_6\text{D}_6$  at RT.

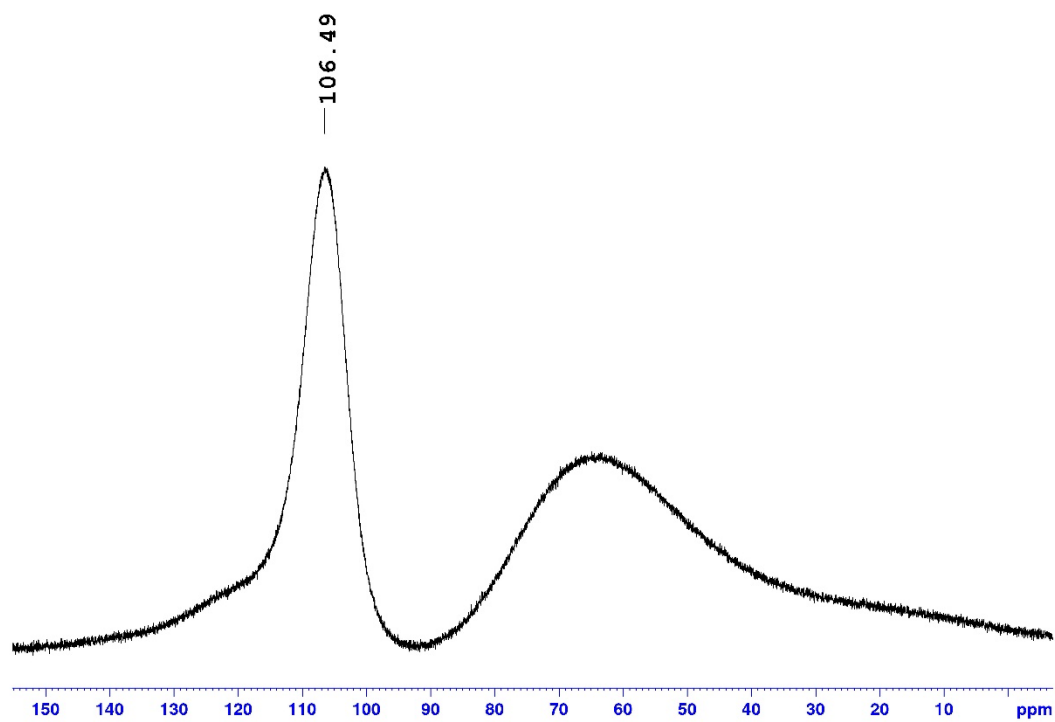

**Figure S2.**  $^{27}\text{Al}\{^1\text{H}\}$  NMR spectrum of  $\text{NHC}^{\text{Me}_4}\cdot\text{AlH}_3$  in  $\text{C}_6\text{D}_6$  at RT.

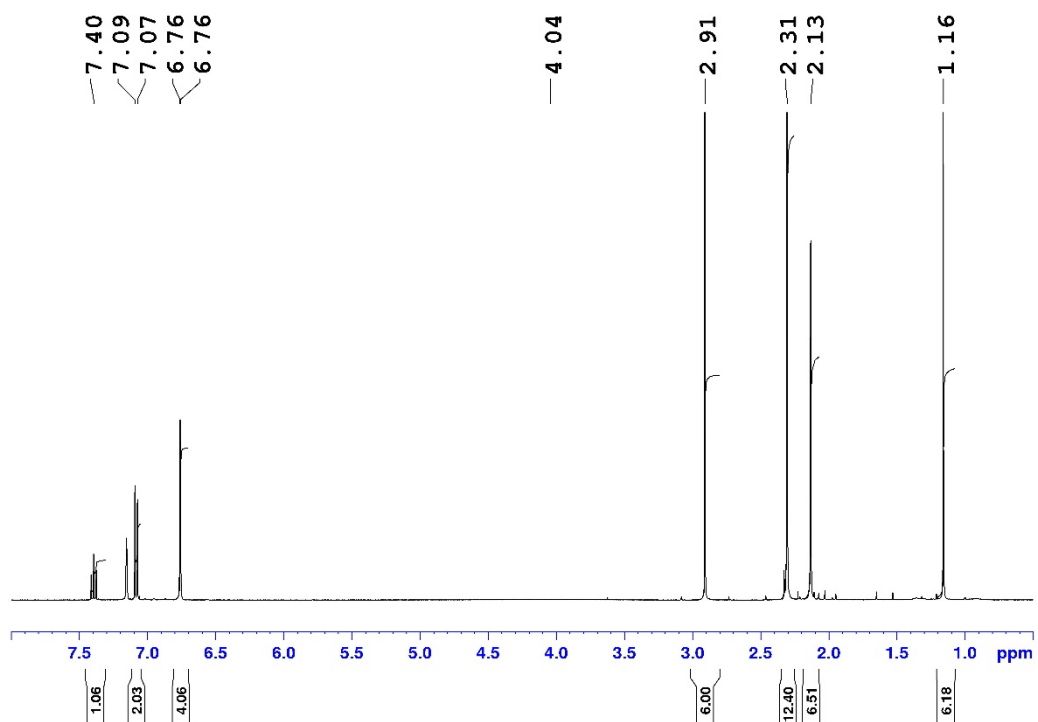

**Figure S3.**  $^1\text{H}$  NMR spectrum of **1** in  $\text{C}_6\text{D}_6$  at RT.

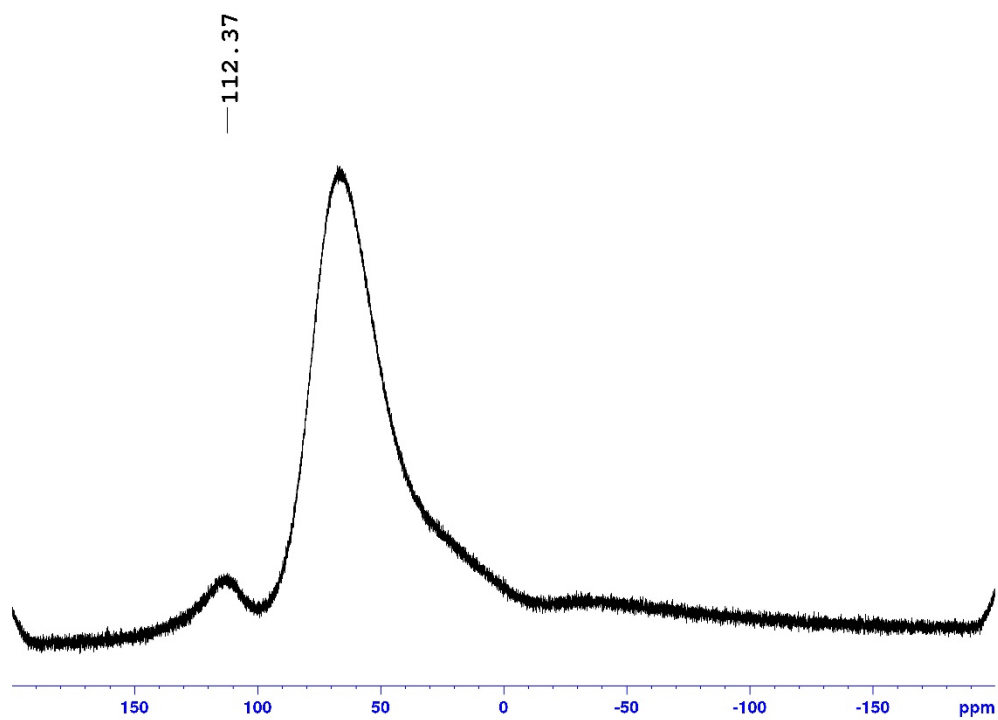

**Figure S4.**  $^{27}\text{Al}\{^1\text{H}\}$  NMR spectrum of **1** in  $\text{C}_6\text{D}_6$  at RT.

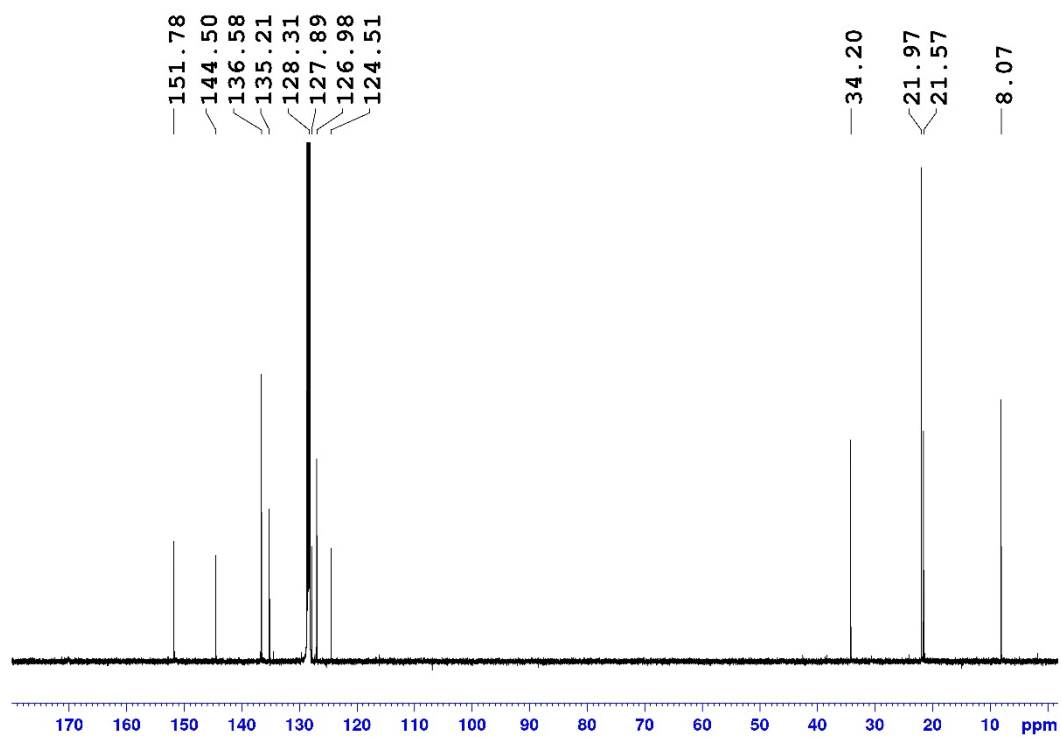

**Figure S5.**  $^{13}\text{C}\{^1\text{H}\}$  NMR spectrum of **1** in  $\text{C}_6\text{D}_6$  at RT.

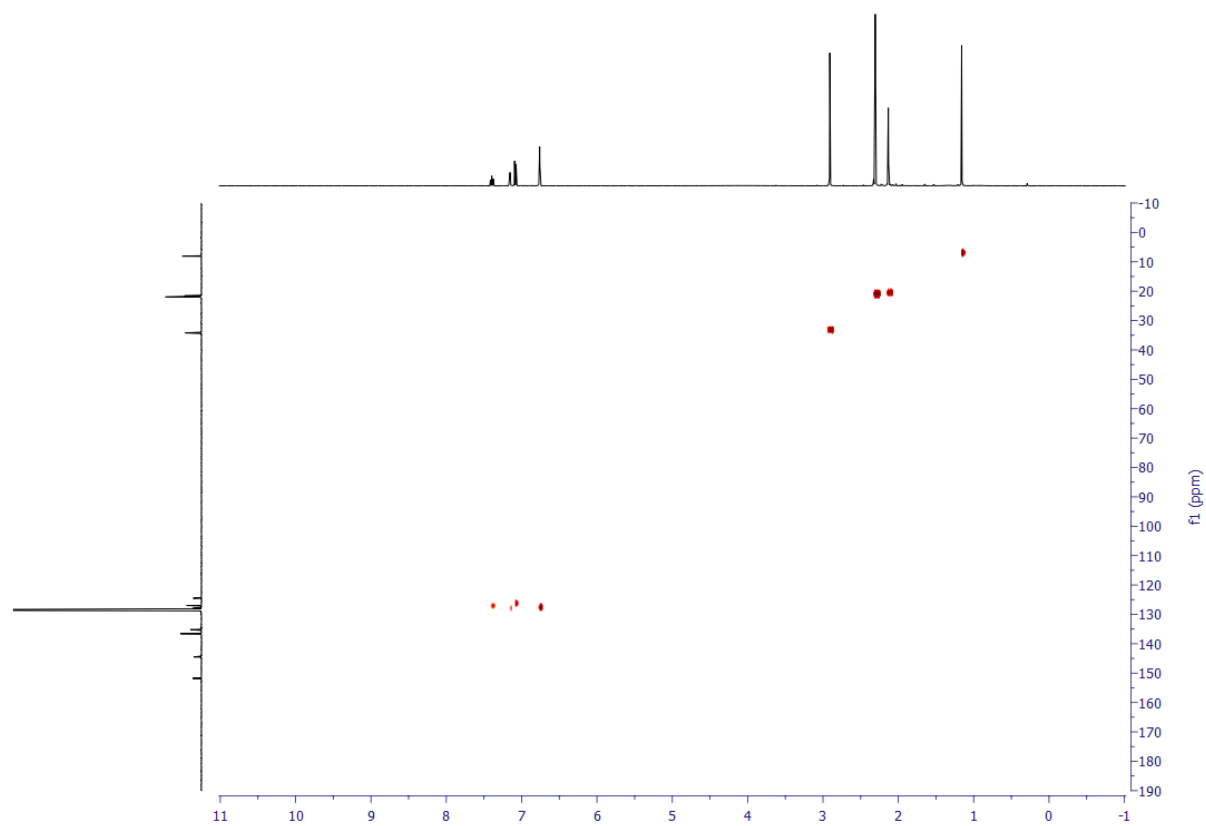

**Figure S6.**  $^{13}\text{C}\text{-}^1\text{H}$  HSQC spectrum of **1** in  $\text{C}_6\text{D}_6$  at RT.



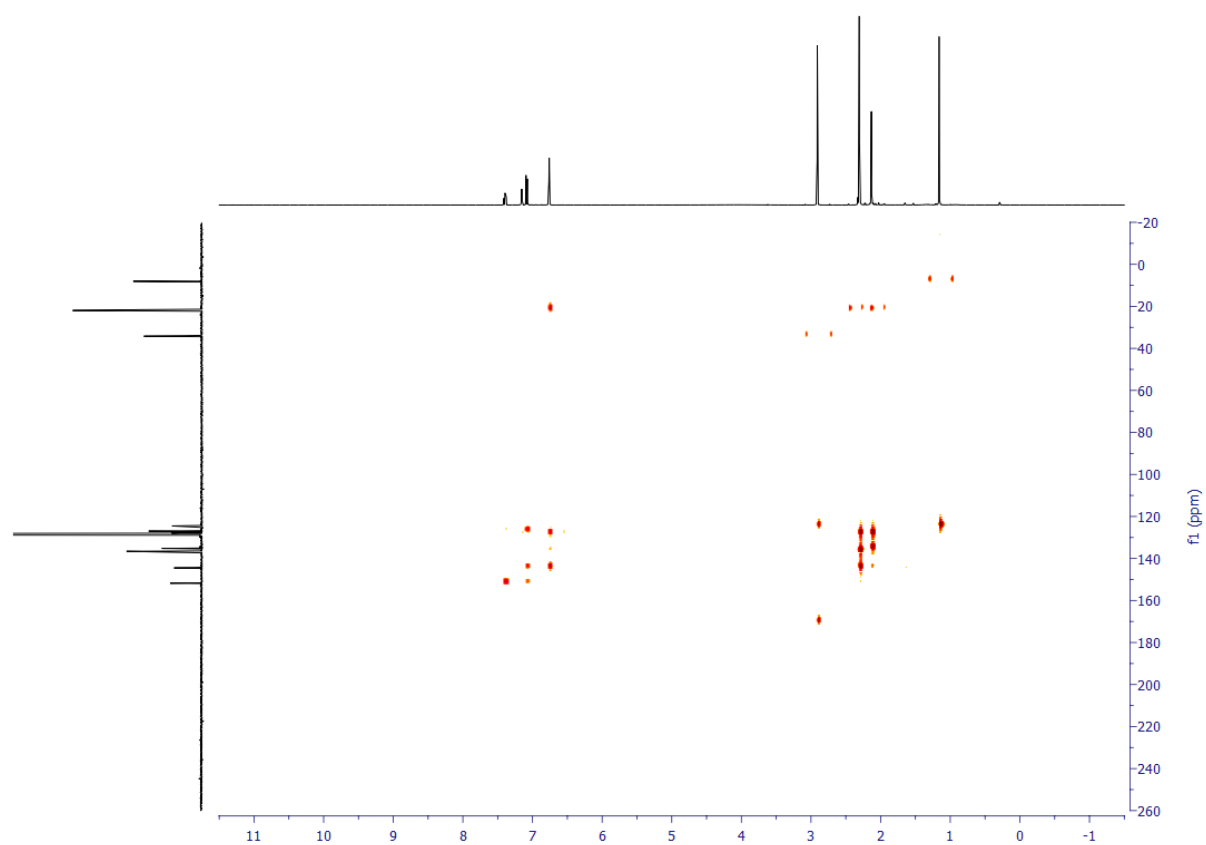

Figure S7.  $^{13}\text{C}$ - $^1\text{H}$  HMBC spectrum of **1** in  $\text{C}_6\text{D}_6$  at RT.

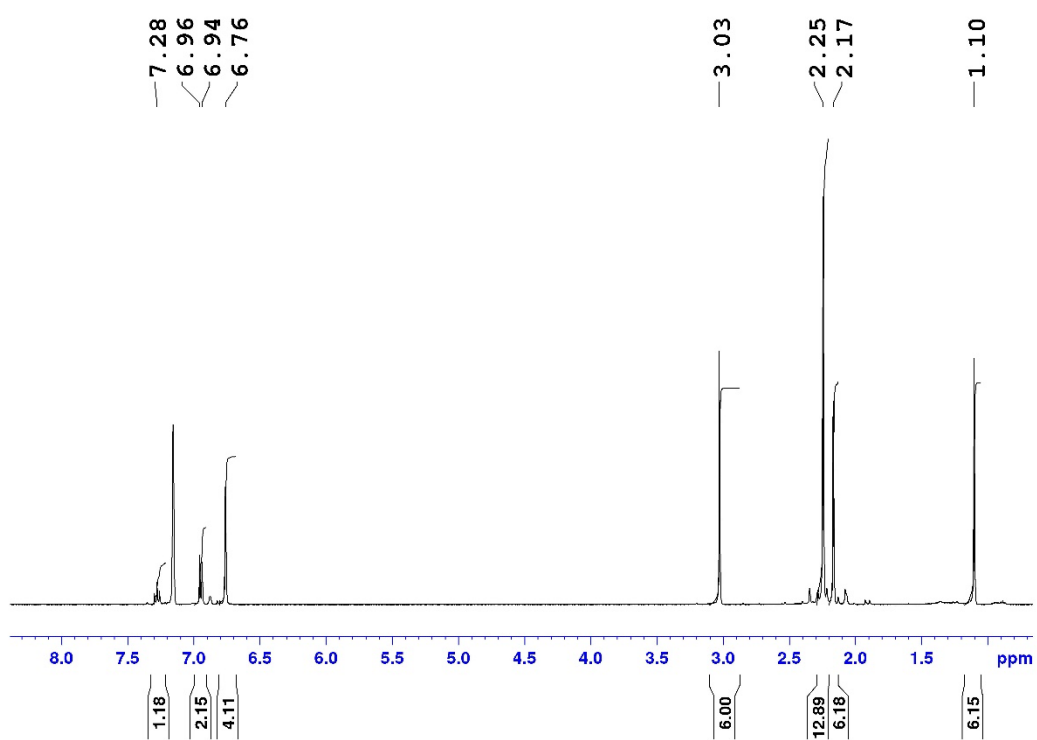

Figure S8.  $^1\text{H}$  NMR spectrum of **2** in  $\text{C}_6\text{D}_6$  at RT.

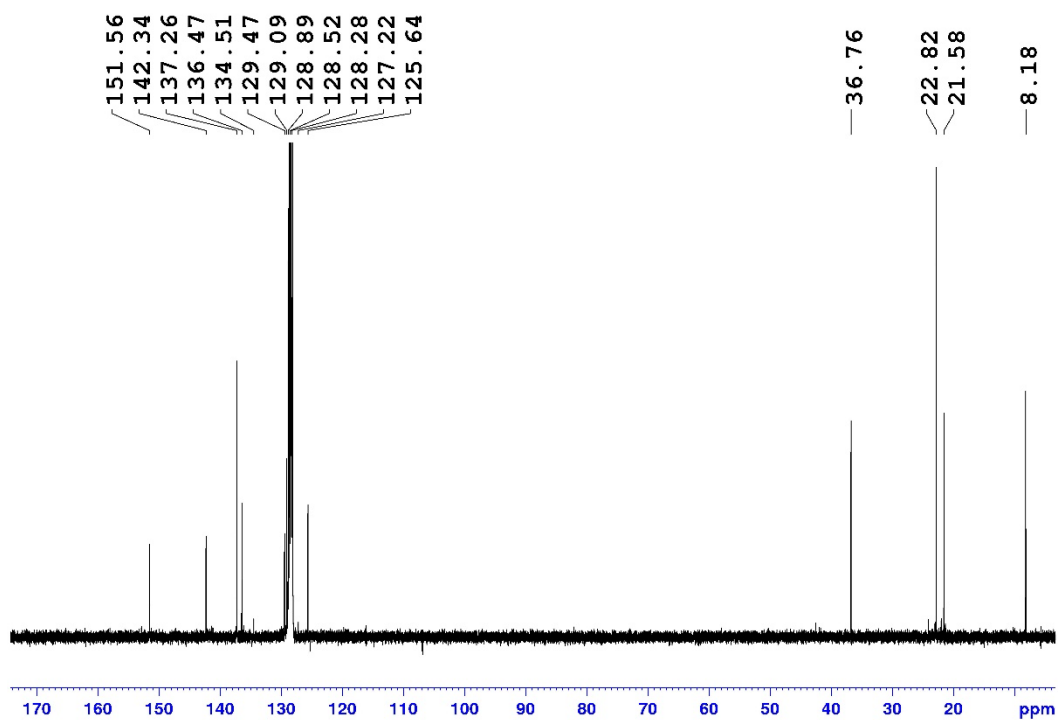

**Figure S9.**  $^{13}\text{C}\{^1\text{H}\}$  NMR spectrum of **2** in  $\text{C}_6\text{D}_6$  at RT.

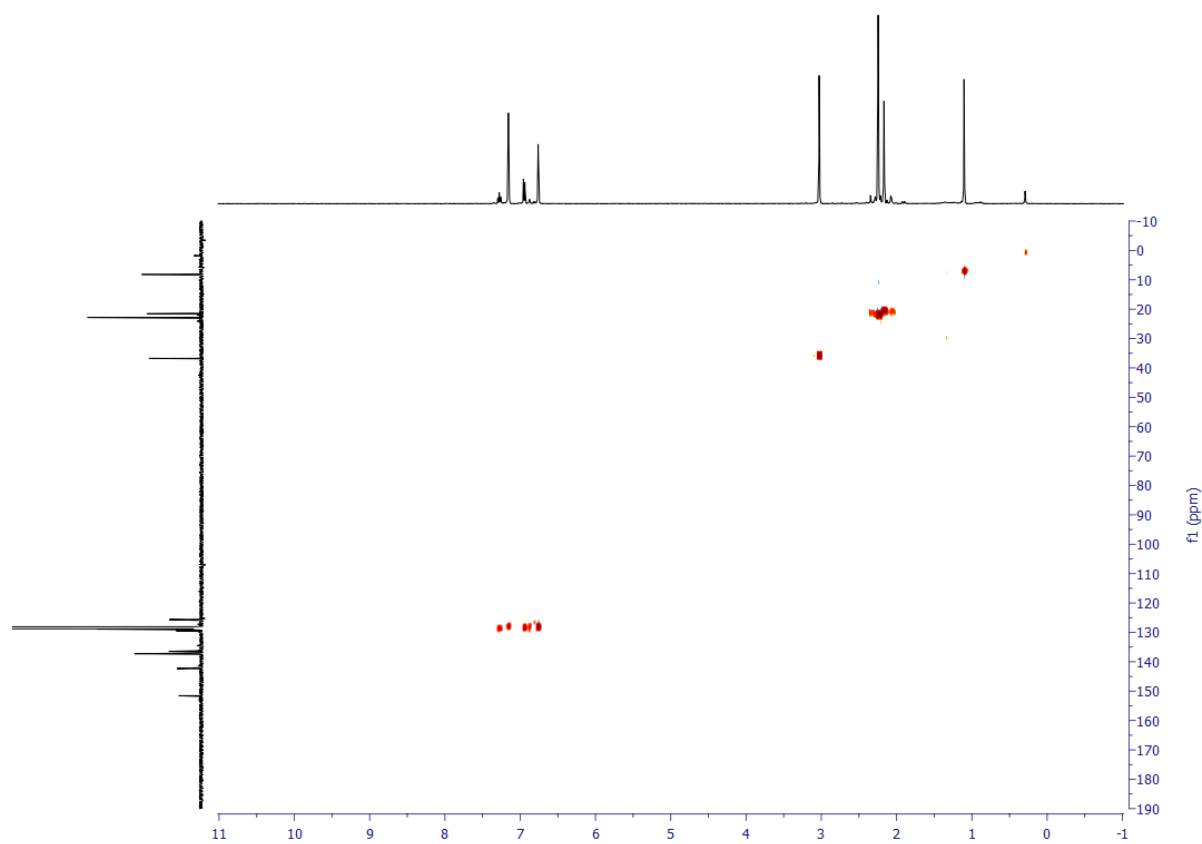

**Figure S10.**  $^{13}\text{C}-^1\text{H}$  HSQC spectrum of **2** in  $\text{C}_6\text{D}_6$  at RT.

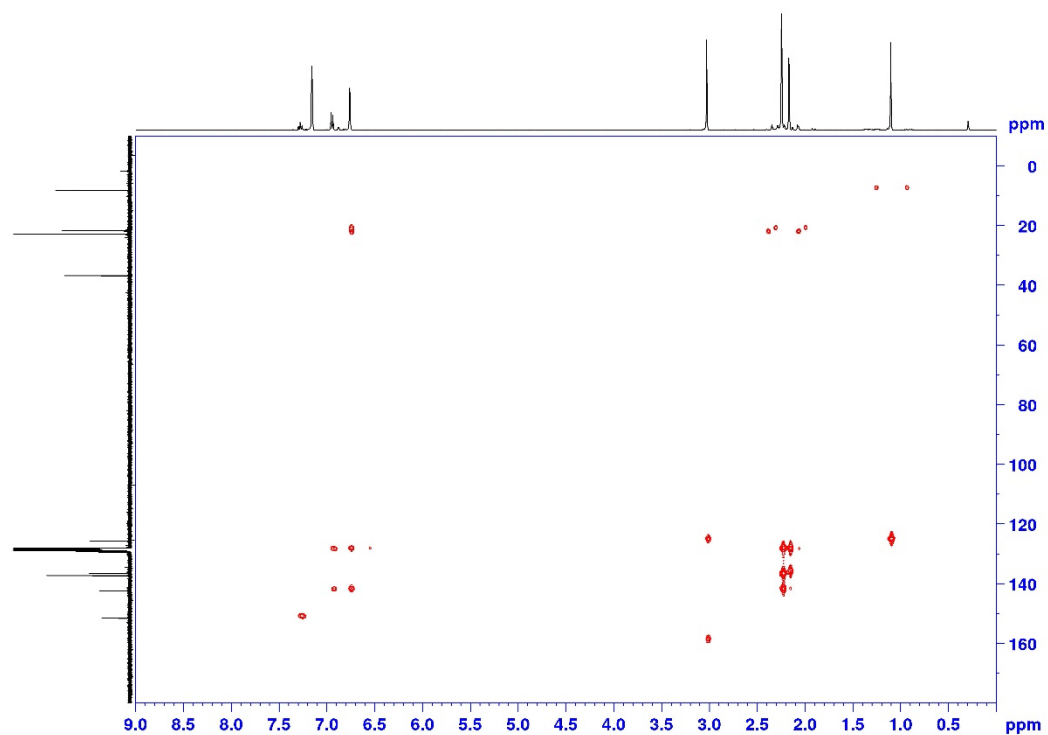

**Figure S11.**  $^{13}\text{C}$ - $^1\text{H}$  HMBC spectrum of **2** in  $\text{C}_6\text{D}_6$  at RT

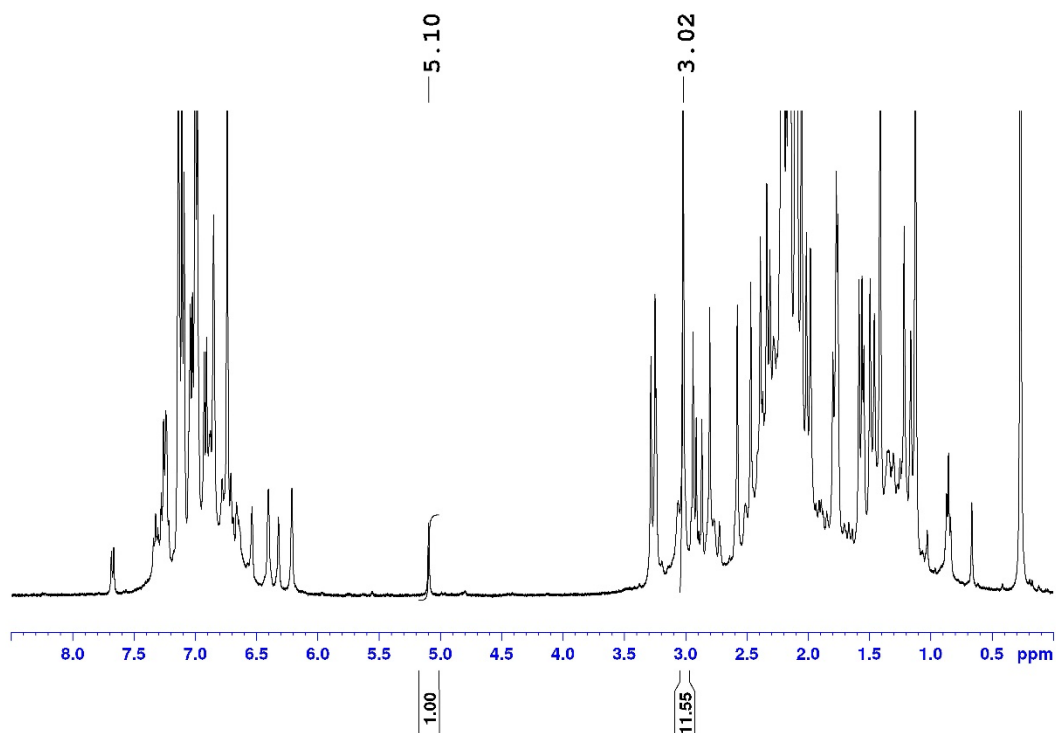

**Figure S12.**  $^1\text{H}$  NMR spectrum of reduction of **2** with 1.5 equivalent of  $\text{KC}_8$  (crude) in  $\text{C}_6\text{D}_6$  at RT.

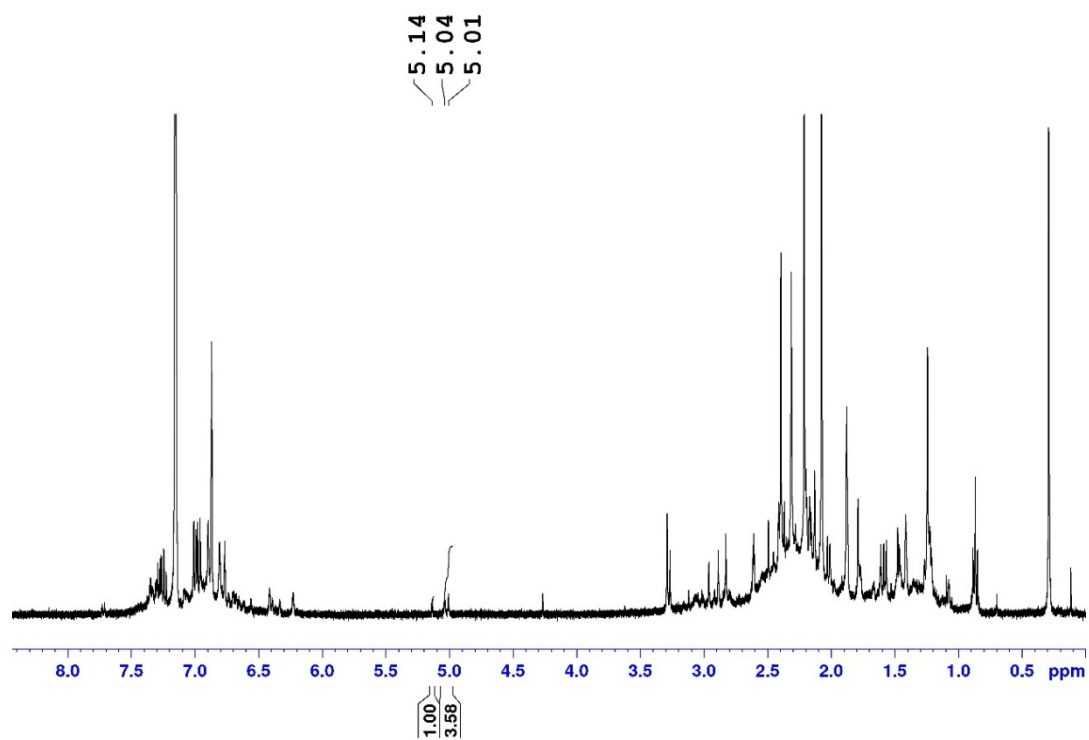

**Figure S13.**  $^1\text{H}$  NMR spectrum of reduction of **2** in dilute solution in benzene (crude) in  $\text{C}_6\text{D}_6$  at RT.

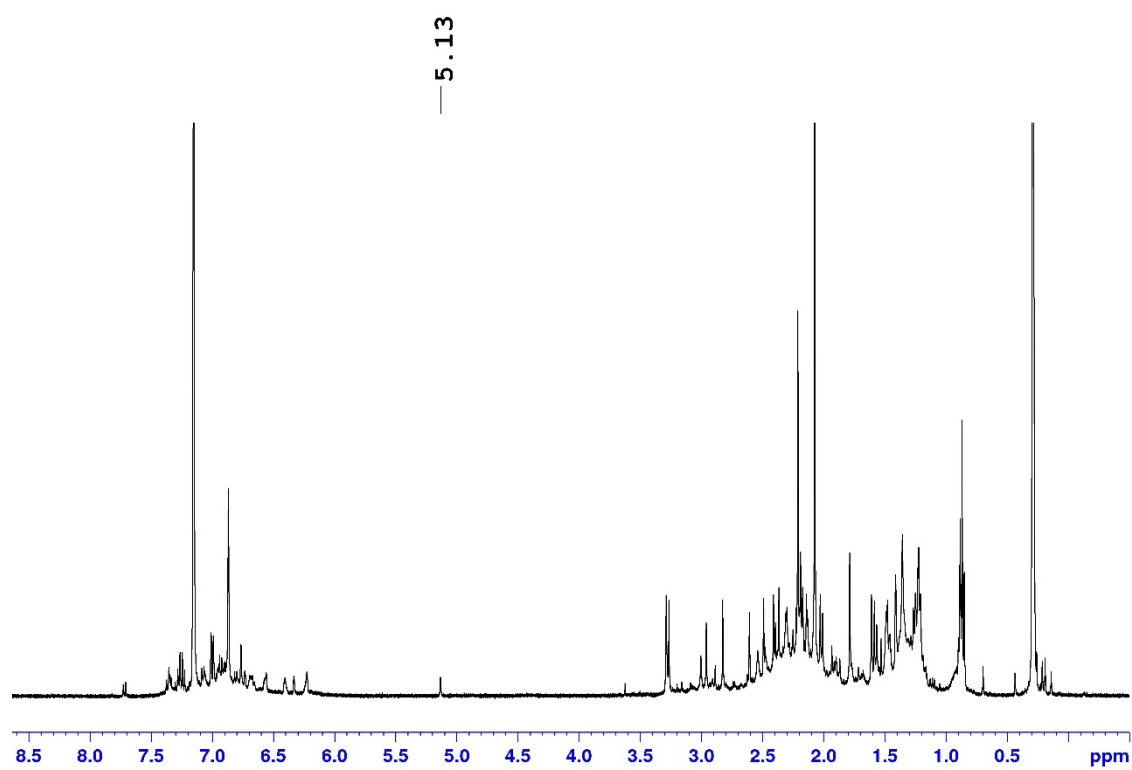

**Figure S14.**  $^1\text{H}$  NMR spectrum of reduction of **2** in dilute solution in hexanes (crude) in  $\text{C}_6\text{D}_6$  at RT.

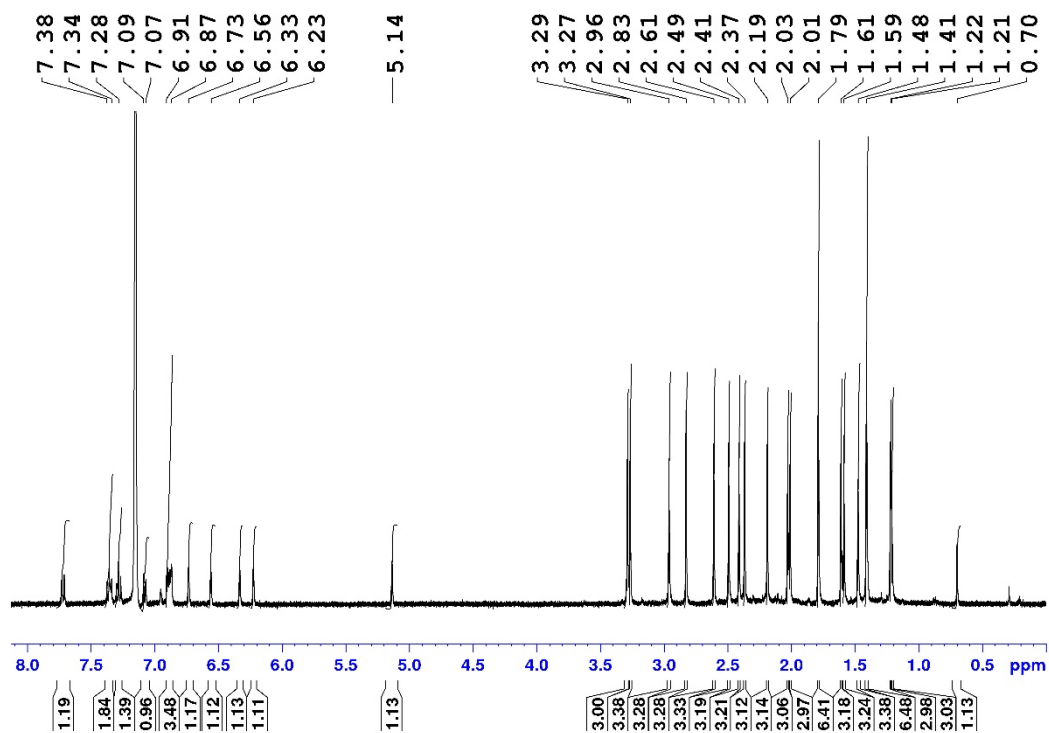

Figure S15.  $^1\text{H}$  NMR spectrum of **3** in  $\text{C}_6\text{D}_6$  at RT.

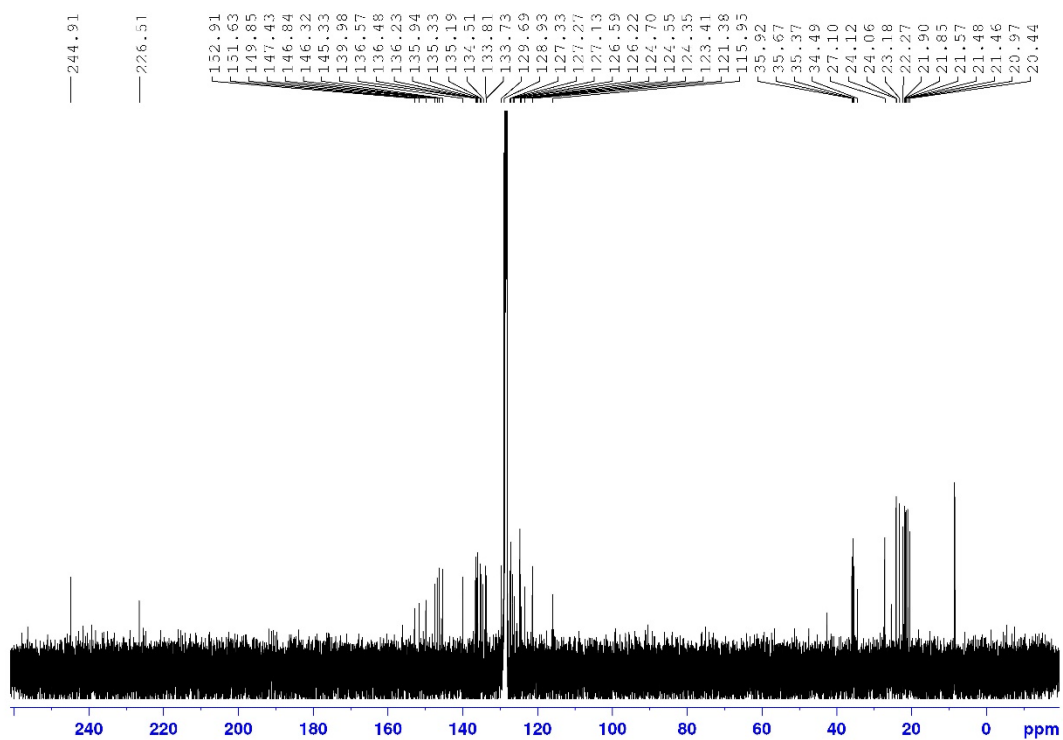

Figure S16.  $^{13}\text{C}\{^1\text{H}\}$  NMR spectrum of **3** in  $\text{C}_6\text{D}_6$  at RT.

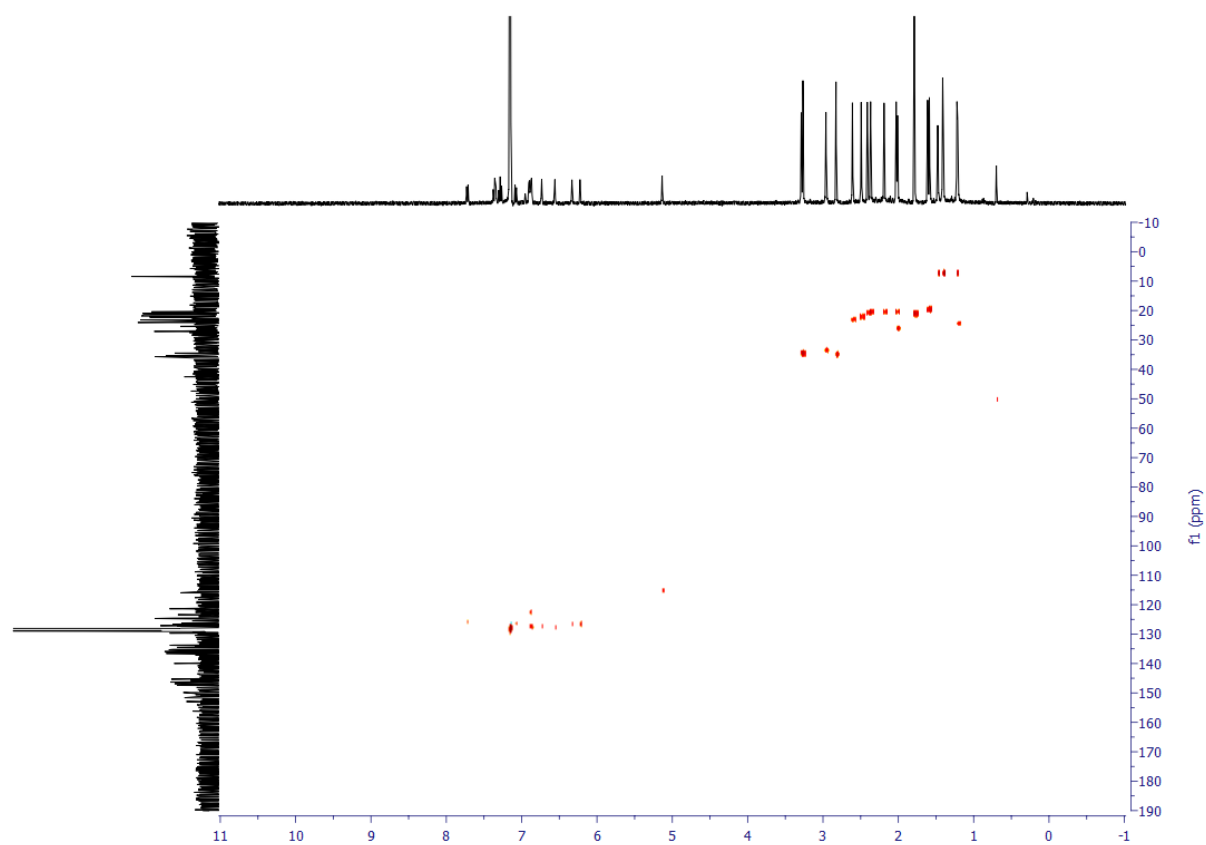

Figure S17.  $^{13}\text{C}$ - $^1\text{H}$  HSQC spectrum of **3** in  $\text{C}_6\text{D}_6$  at RT.

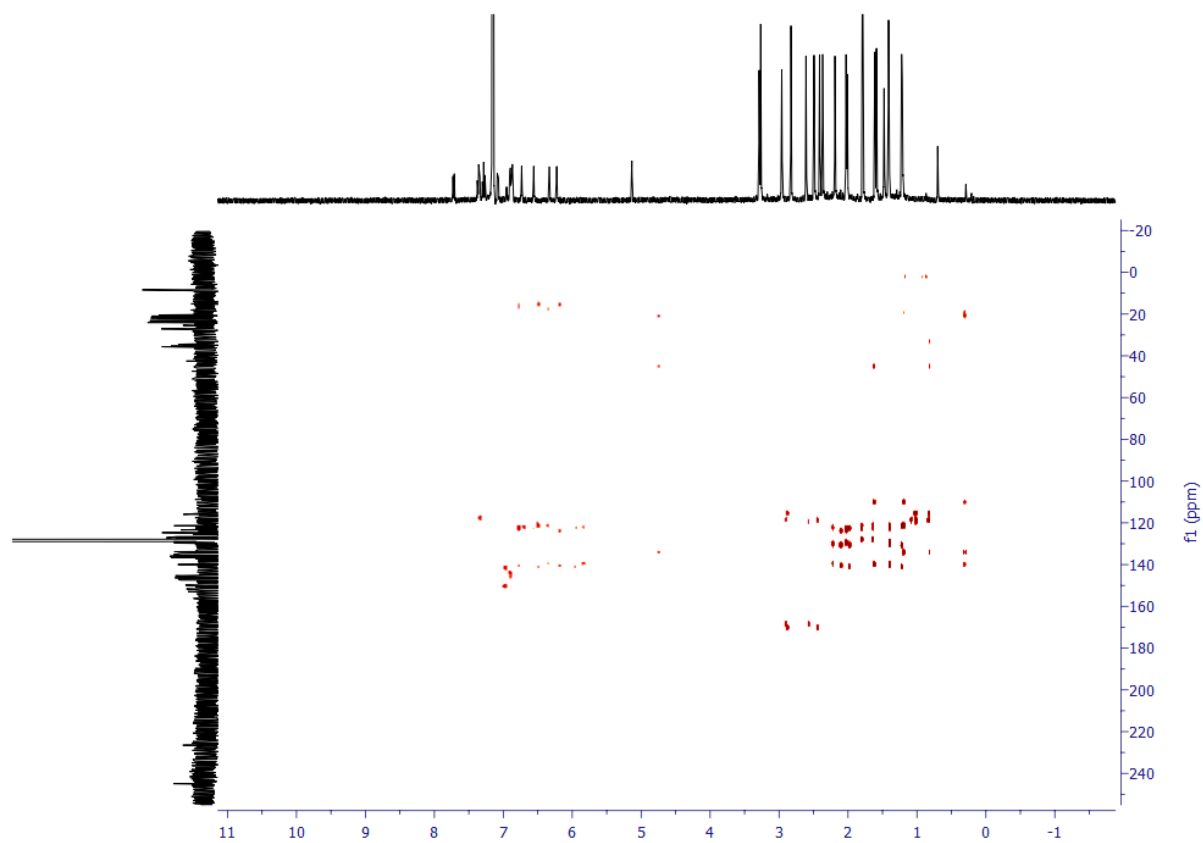

Figure S18.  $^{13}\text{C}$ - $^1\text{H}$  HMBC spectrum of **3** in  $\text{C}_6\text{D}_6$  at RT

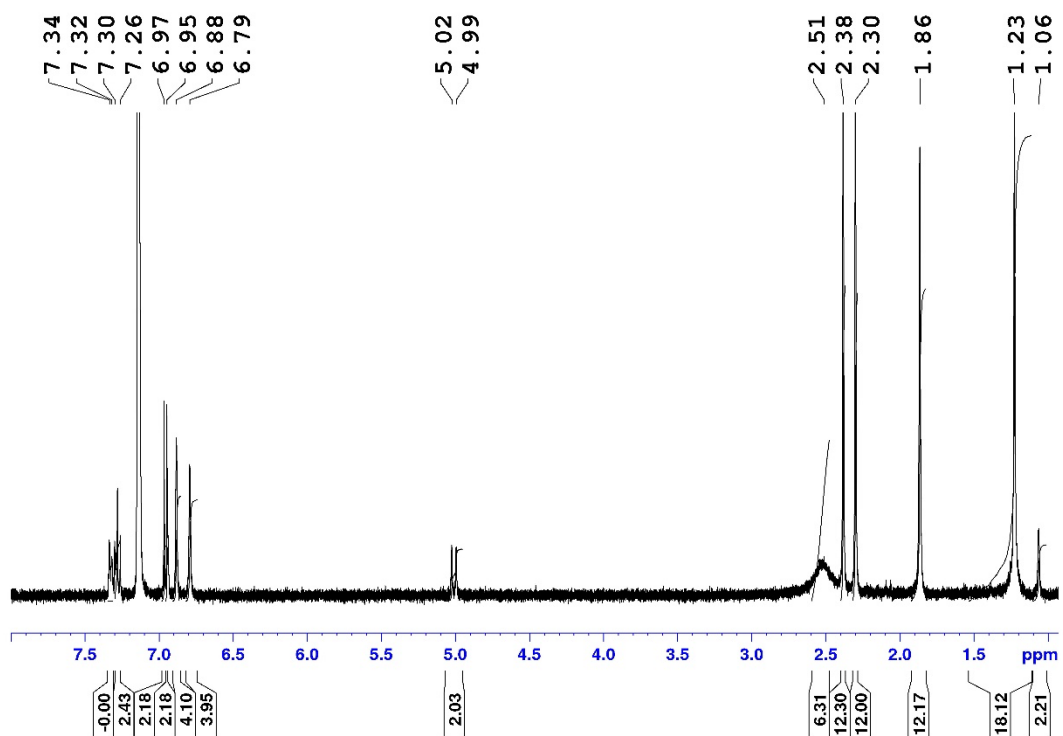

Figure S19.  $^1\text{H}$  NMR spectrum of **4** in  $\text{C}_6\text{D}_6$  at RT.

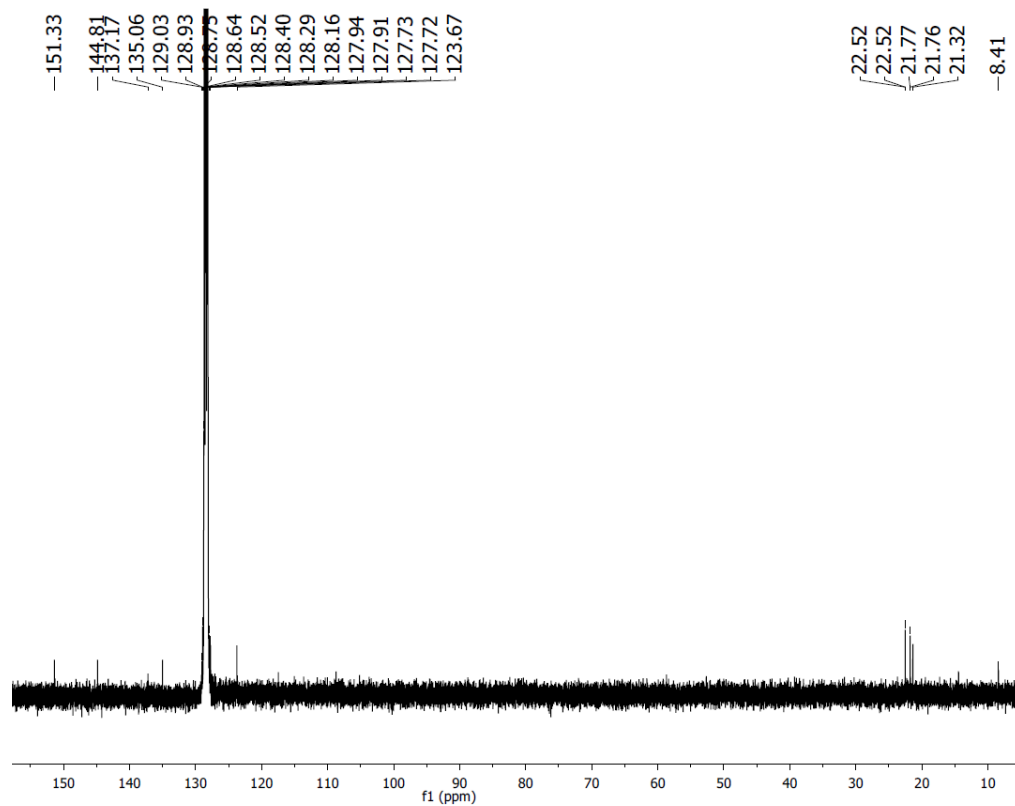

Figure S20.  $^{13}\text{C}\{^1\text{H}\}$  NMR spectrum of **4** in  $\text{C}_6\text{D}_6$  at RT.

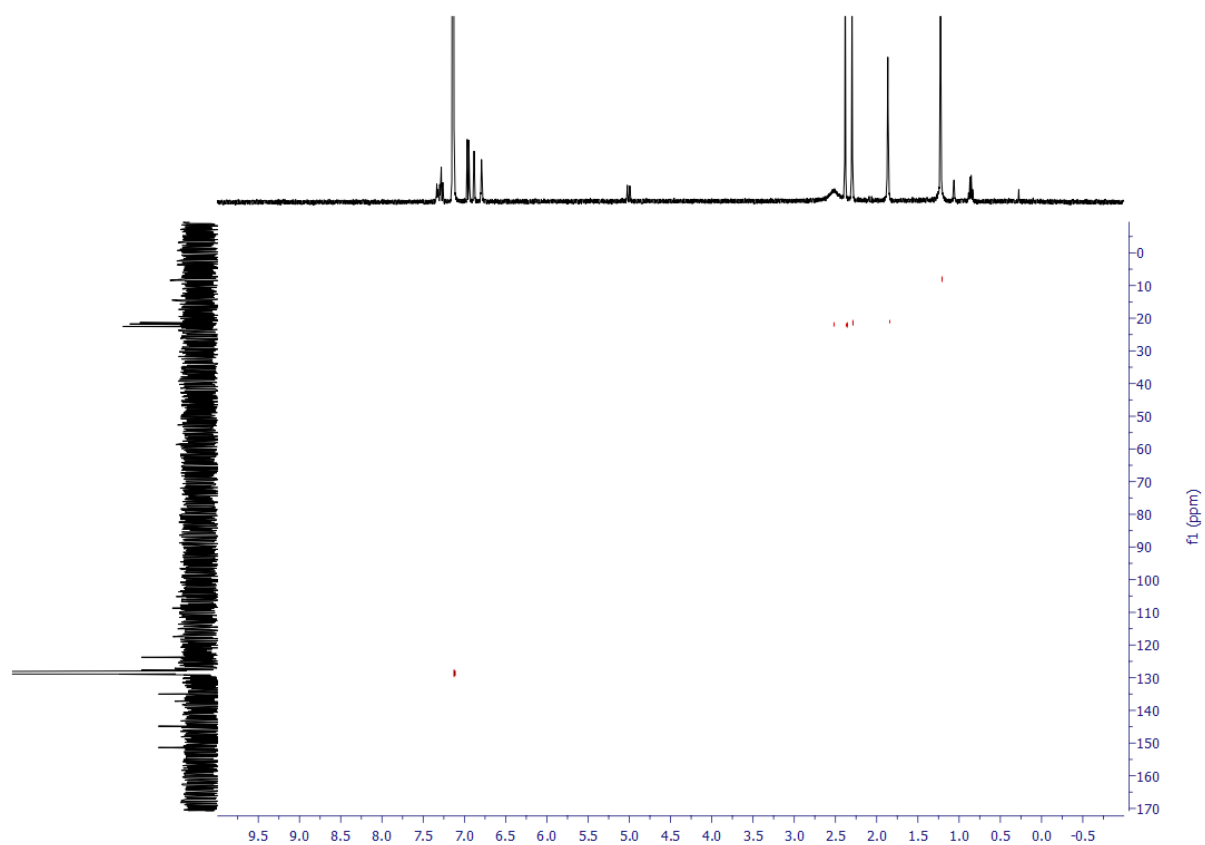

**Figure S21.**  $^{13}\text{C}$ - $^1\text{H}$  HSQC spectrum of **4** in  $\text{C}_6\text{D}_6$  at RT

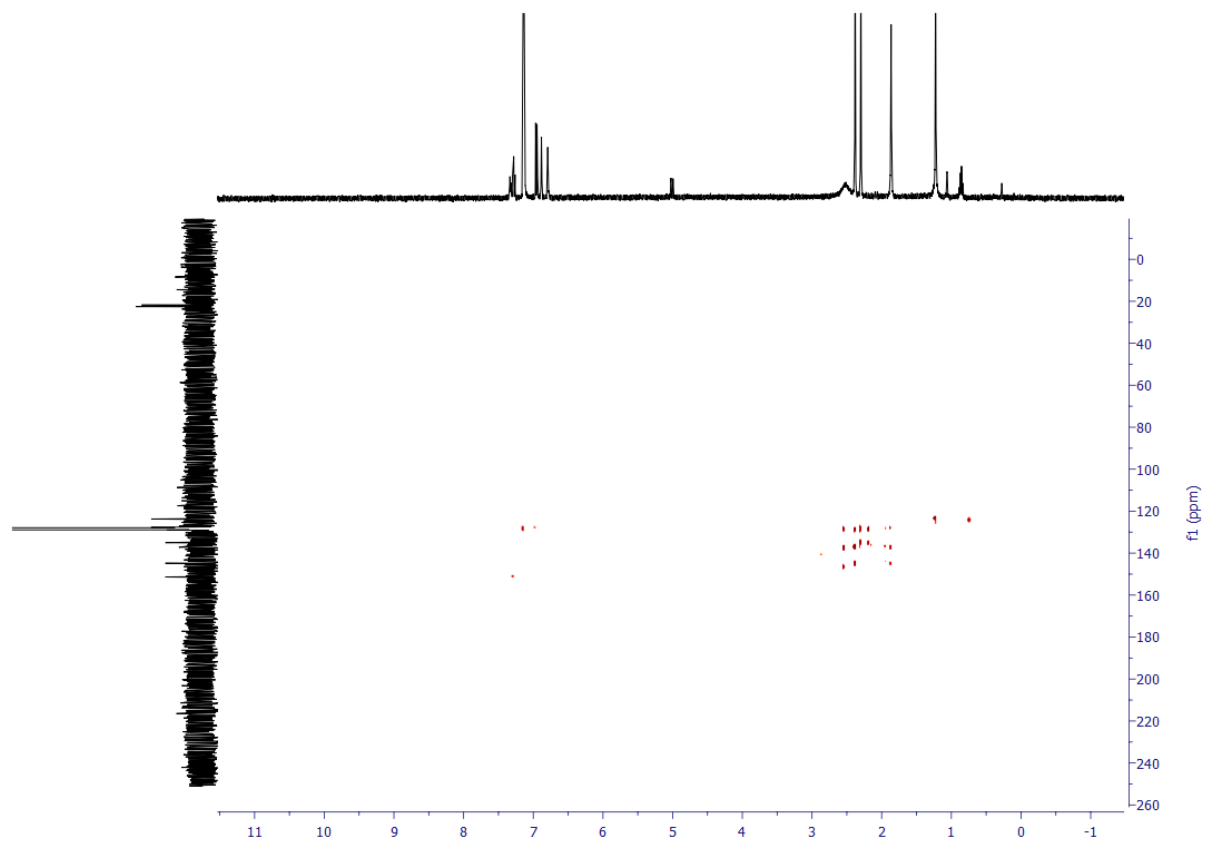

**Figure S22.**  $^{13}\text{C}$ - $^1\text{H}$  HMBC spectrum of **4** in  $\text{C}_6\text{D}_6$  at RT.



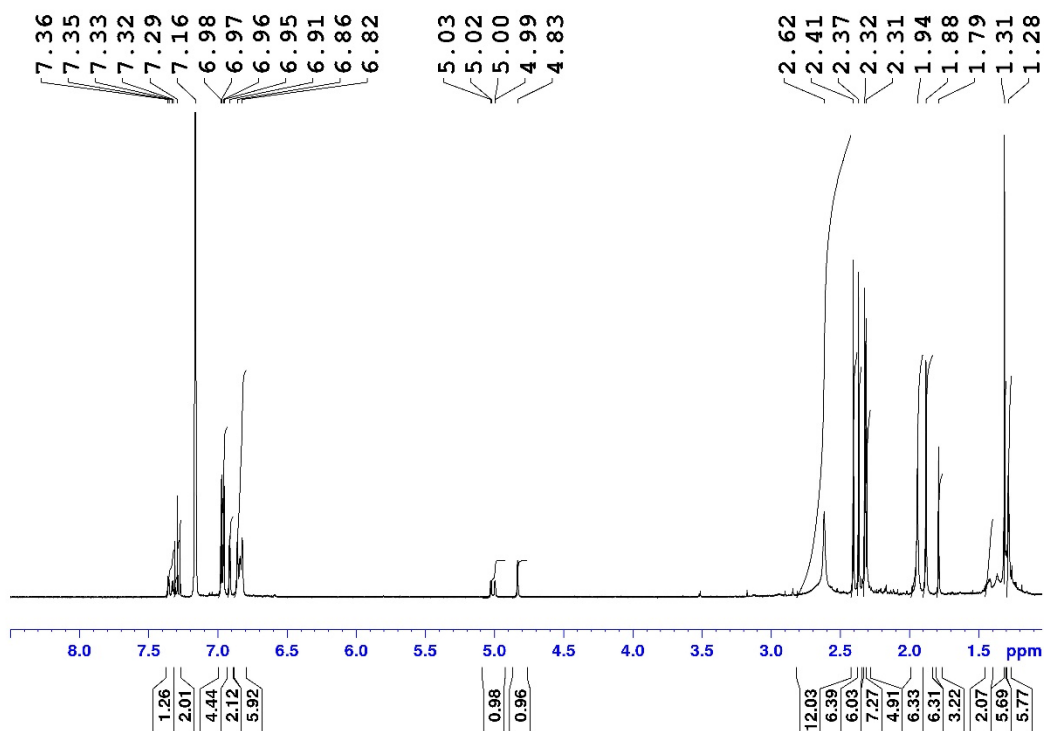

Figure S23.  $^1\text{H}$  NMR spectrum of **5** in  $\text{C}_6\text{D}_6$  at RT.

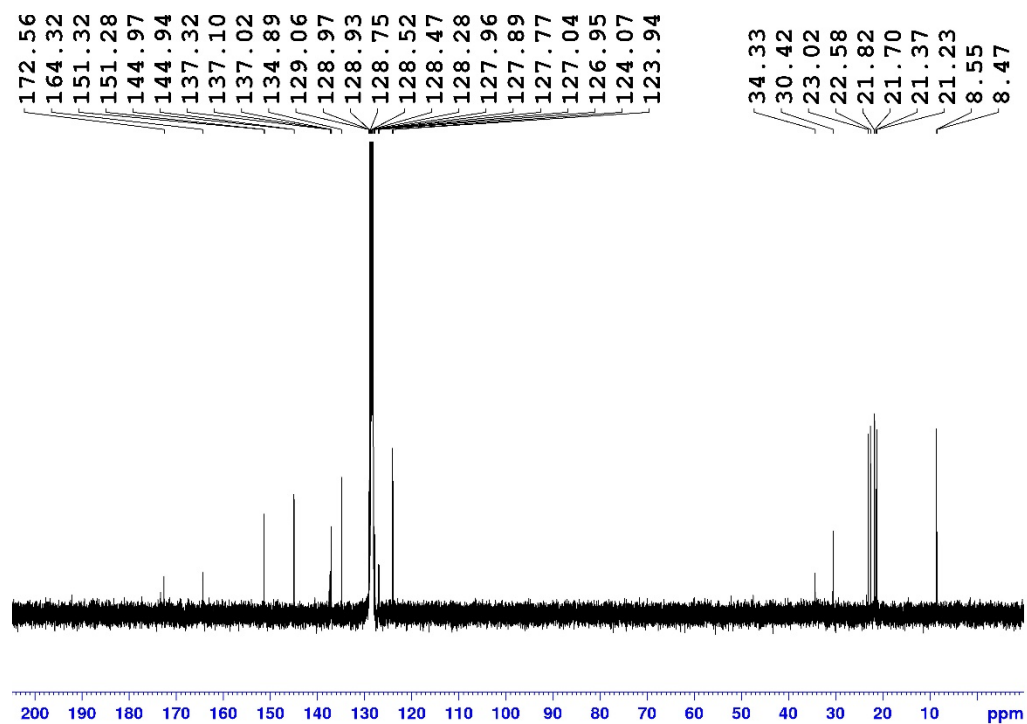

Figure S24.  $^{13}\text{C}\{^1\text{H}\}$  NMR spectrum of **5** in  $\text{C}_6\text{D}_6$  at RT.

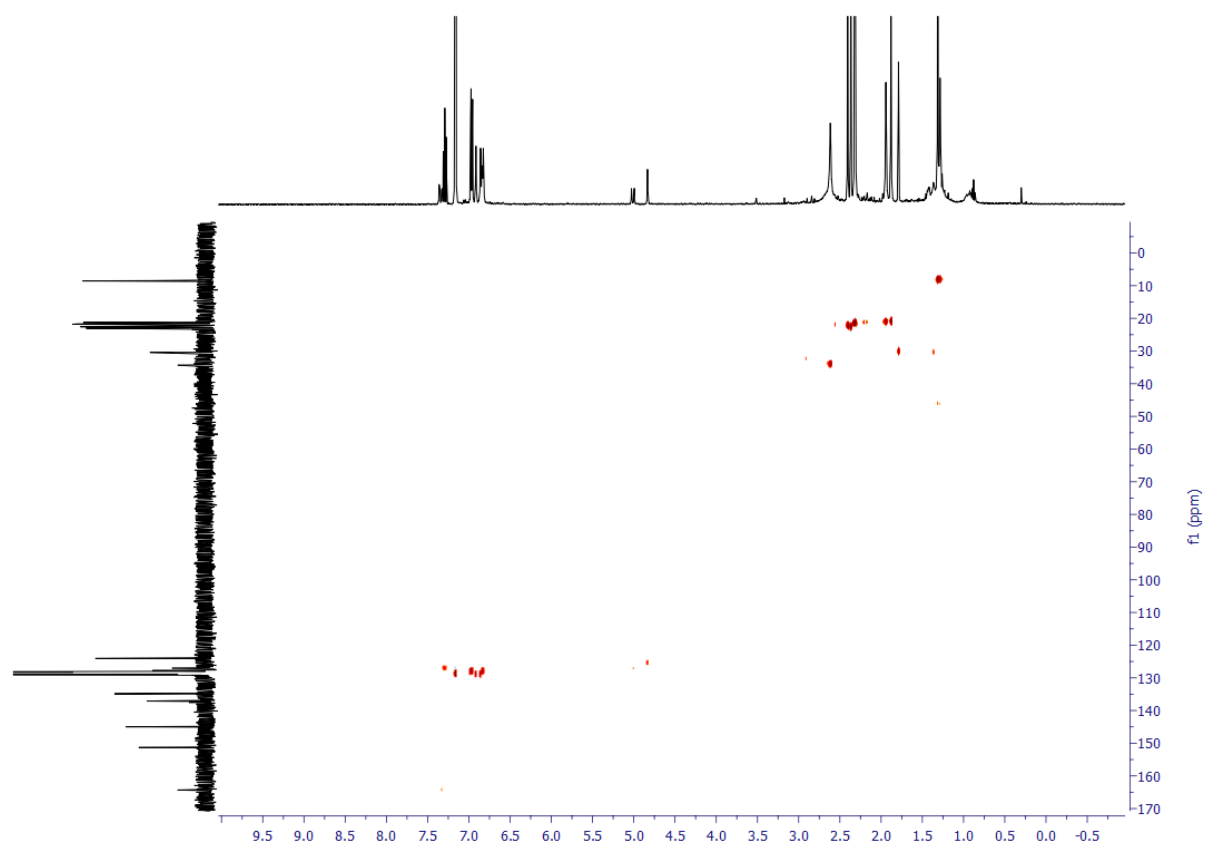

Figure S25.  $^{13}\text{C}$ - $^1\text{H}$  HSQC spectrum of **5** in  $\text{C}_6\text{D}_6$  at RT.

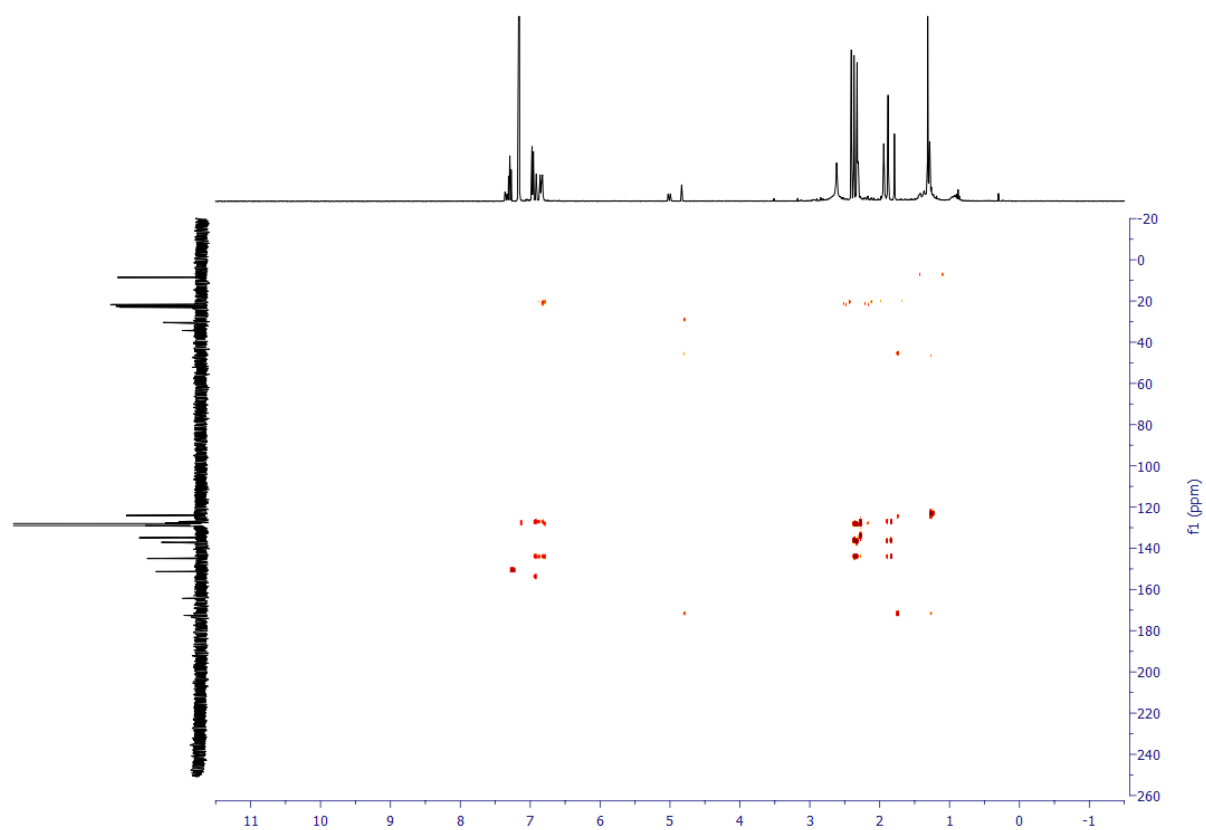

Figure S26.  $^{13}\text{C}$ - $^1\text{H}$  HMBC spectrum of **5** in  $\text{C}_6\text{D}_6$  at RT

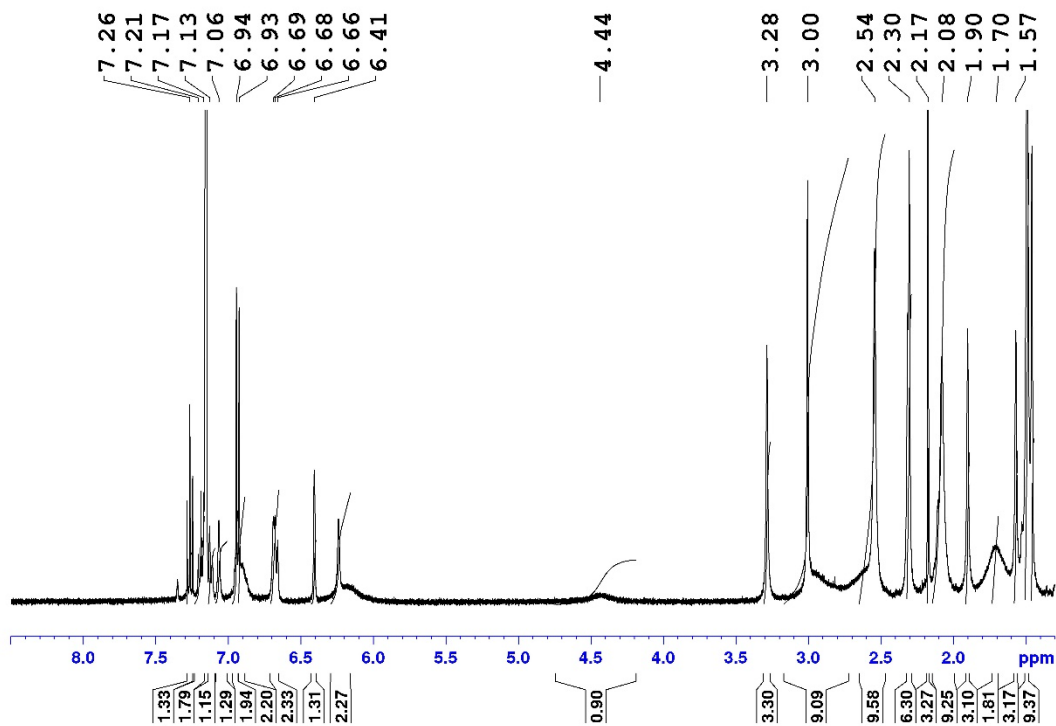

Figure 27.  $^1\text{H}$  NMR spectrum of **8** in  $\text{C}_6\text{D}_6$  at RT.

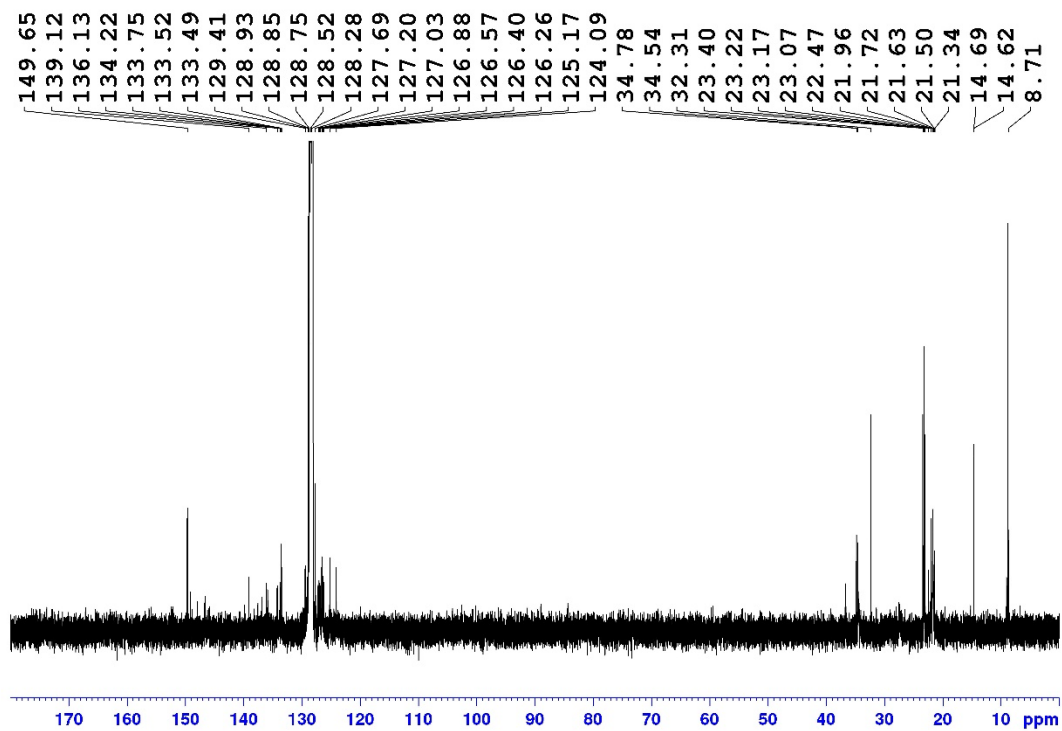

Figure S28.  $^{13}\text{C}\{^1\text{H}\}$  NMR spectrum of **8** in  $\text{C}_6\text{D}_6$  at RT.

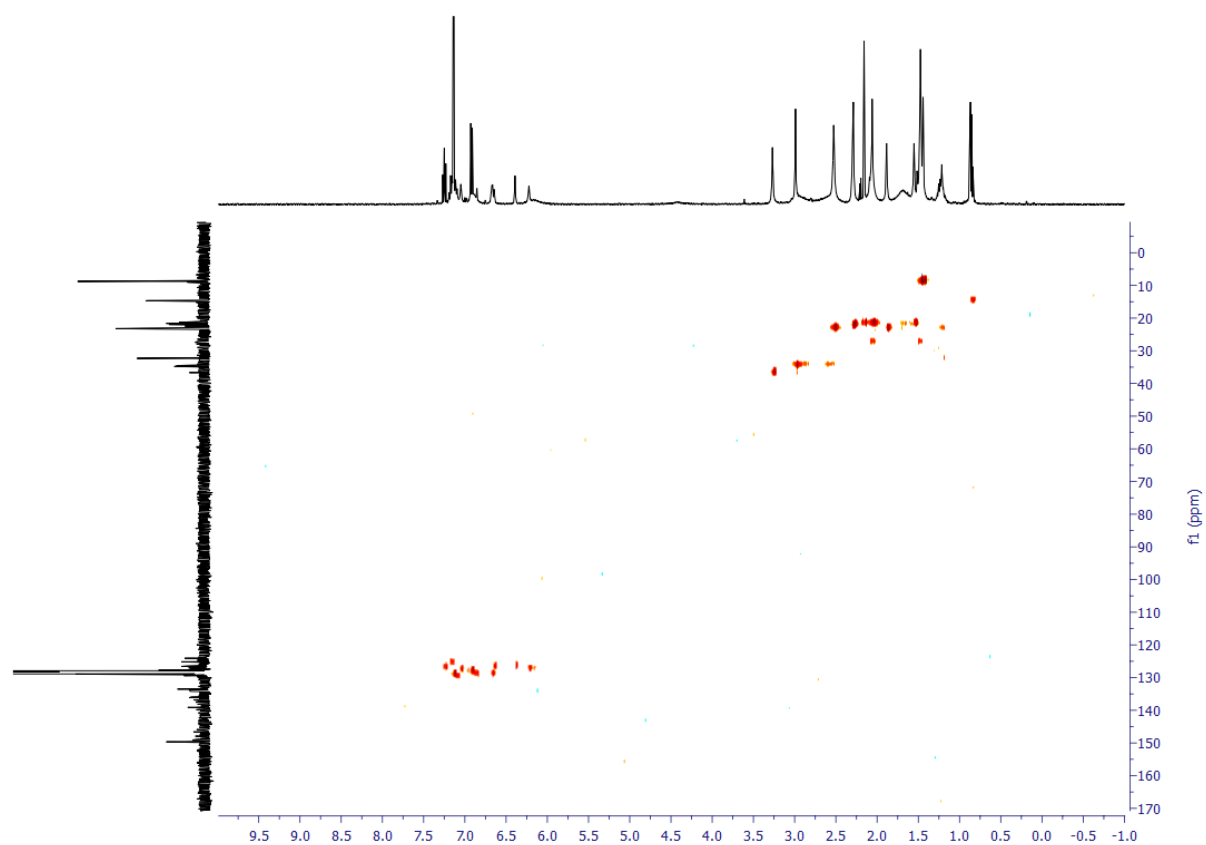

**Figure S29.**  $^{13}\text{C}$ - $^1\text{H}$  HSQC spectrum of **8** in  $\text{C}_6\text{D}_6$  at RT.

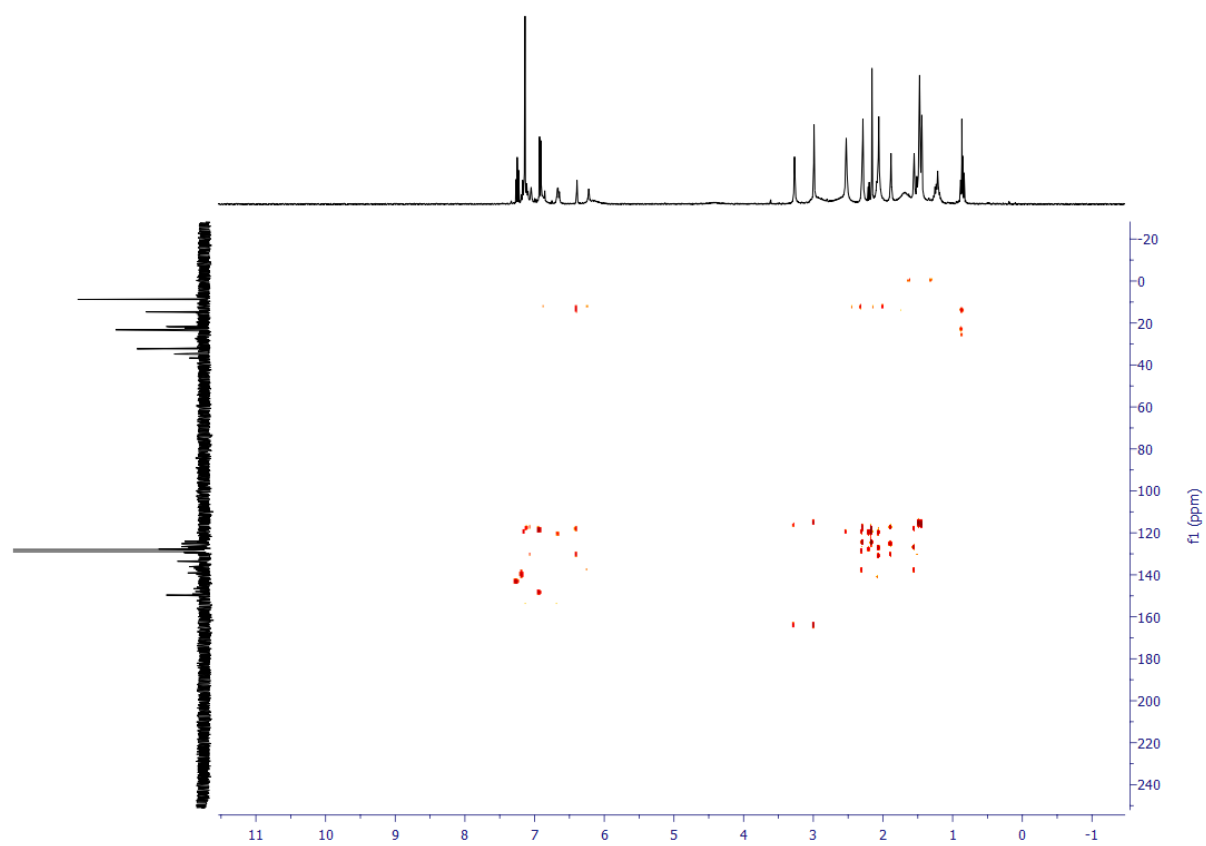

**Figure S30.**  $^{13}\text{C}$ - $^1\text{H}$  HMBC spectrum of **8** in  $\text{C}_6\text{D}_6$  at RT.



#### 1.4. UV-Vis spectra

The UV-vis absorption spectra of **3** was measured on a METTLER TOLEDO UV-vis Excellence UV5 spectrophotometer.

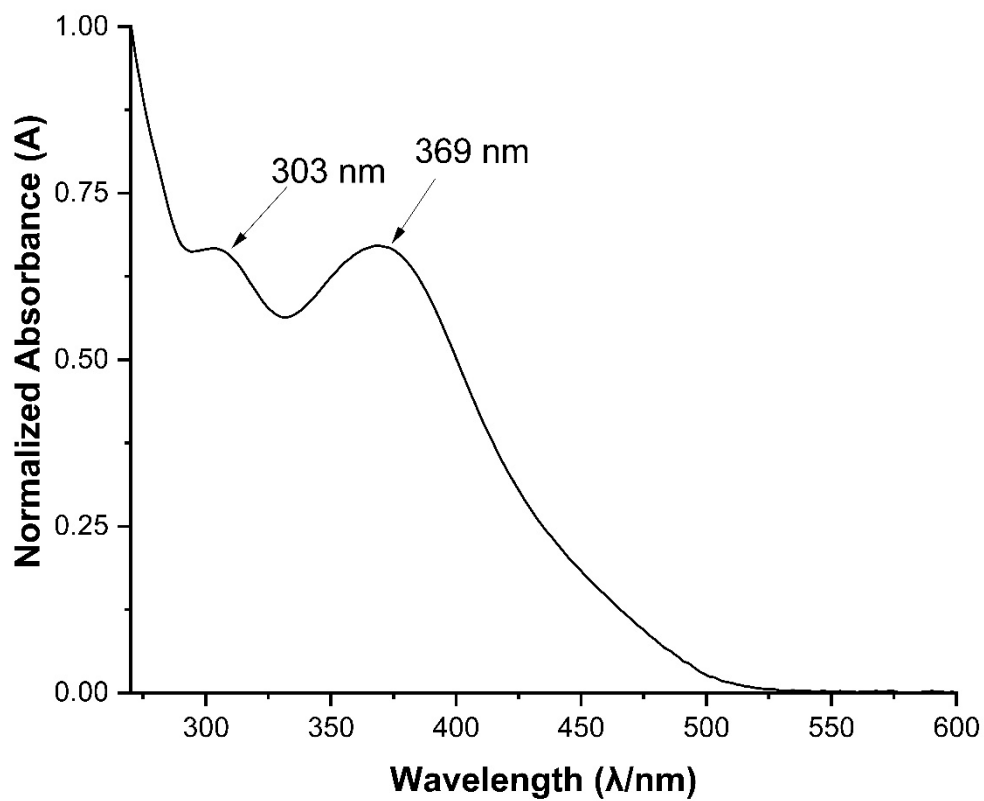

**Figure S31.** UV/Vis spectrum of compound **3** in hexanes at RT.

## 1.5. Crystal structure determination

The crystal data of **1** and **4-8** were collected on a XTALAB SYNERGY, DUALFLEX, HYPIX diffractometer with a hybrid pixel array detector and multi-layer mirror monochromated  $\text{Cu}_{K\alpha}$  radiation. The crystal data of **2** were collected on a BRUKER X8-APEX II diffractometer with a CCD area detector and multi-layer mirror monochromated  $\text{Mo}_{K\alpha}$  radiation. The crystal data of **3** were collected on a BRUKER D8 QUEST diffractometer with a CMOS area detector and multi-layer mirror monochromated  $\text{Mo}_{K\alpha}$  radiation. The structures were solved using the intrinsic phasing method,<sup>5</sup> refined with the SHELXL program<sup>6</sup> and expanded using Fourier techniques. All non-hydrogen atoms were refined anisotropically. Hydrogen atoms were included in structure factor calculations. All hydrogen atoms were assigned to idealized geometrical positions unless otherwise stated.

**Crystal data for 1 (CCDC: 2107311)****Table**

| Data                                                           | <b>MaHa101_DeDh_a</b>                              |
|----------------------------------------------------------------|----------------------------------------------------|
| Empirical formula                                              | C <sub>31</sub> H <sub>39</sub> AlN <sub>2</sub>   |
| Formula weight (g·mol <sup>-1</sup> )                          | 466.62                                             |
| Temperature (K)                                                | 100.0(6)                                           |
| Radiation, $\lambda$ (Å)                                       | CuK $\alpha$ 1.54184                               |
| Crystal system                                                 |                                                    |
| Space group                                                    | <i>P</i> 2 <sub>1</sub> / <i>n</i>                 |
| <i>Unit cell dimensions</i>                                    |                                                    |
| <i>a</i> (Å)                                                   | 8.67310(10)                                        |
| <i>b</i> (Å)                                                   | 13.6845(2)                                         |
| <i>c</i> (Å)                                                   | 22.6164(3)                                         |
| $\alpha$ (°)                                                   | 90                                                 |
| $\beta$ (°)                                                    | 95.0260(10)                                        |
| $\gamma$ (°)                                                   | 90                                                 |
| Volume (Å <sup>3</sup> )                                       | 2673.95(6)                                         |
| <i>Z</i>                                                       | 4                                                  |
| Calculated density (Mg·m <sup>-3</sup> )                       | 1.159                                              |
| Absorbtion coefficient (mm <sup>-1</sup> )                     | 0.805                                              |
| <i>F</i> (000)                                                 | 1008                                               |
| Theta range for collection                                     | 3.779 to 77.488°                                   |
| Reflections collected                                          | 19589                                              |
| Independent reflections                                        | 5475                                               |
| Minimum/maximum transmission                                   | 0.66191/1.00000                                    |
| Refinement method                                              | Full-matrix least-squares on <i>F</i> <sup>2</sup> |
| Data / parameters / restraints                                 | 5475 / 411 / 437                                   |
| Goodness-of-fit on <i>F</i> <sup>2</sup>                       | 1.049                                              |
| Final R indices [ <i>I</i> >2 $\sigma$ ( <i>I</i> )]           | R <sub>1</sub> = 0.0366, wR <sub>2</sub> = 0.0979  |
| R indices (all data)                                           | R <sub>1</sub> = 0.0407, wR <sub>2</sub> = 0.1011  |
| Maximum/minimum residual electron density (e·Å <sup>-3</sup> ) | 0.265 / -0.251                                     |

**Refinement details:** All hydrogen atoms except H1 and H2 were assigned to idealized positions. The coordinates of H1 and H2 of residue 1 (MAIN) were refined freely. The atomic displacement parameters for atoms N1 to C9 of the residues 2 and 12 (IMEM) were restrained with the RIGU keyword in the ShelXL input ('enhanced rigid bond' restraint for all bonds in the connectivity list. Standard values of 0.004 for both parameters s1 and s2 were used). The displacement parameters of atoms N1 to C9 of the residues 2 and 12 (IMEM) were restrained to the same value with similarity restraint SIMU. During refinement, the distances between



atoms A11 of residue 1 (MAIN) and C2 of residues 2 and 12 (IMEM) were restrained to the same value using SADI. The 1-2 and 1-3 distances in N1 to C9 of residues 2 and 12 (IMEM) were restrained to the same values with the SAME keyword.

## Crystal data for 2.C<sub>7</sub>H<sub>8</sub> (CCDC: 2107312)

### Table

|                                             |                                                                                 |
|---------------------------------------------|---------------------------------------------------------------------------------|
| Identification code                         | test1_a                                                                         |
| Empirical formula                           | C <sub>159</sub> H <sub>188</sub> Al <sub>4</sub> I <sub>8</sub> N <sub>8</sub> |
| Formula weight                              | 3334.28                                                                         |
| Temperature/K                               | 100(2)                                                                          |
| Crystal system                              | triclinic                                                                       |
| Space group                                 | P-1                                                                             |
| a/Å                                         | 15.879(10)                                                                      |
| b/Å                                         | 16.076(18)                                                                      |
| c/Å                                         | 16.533(11)                                                                      |
| α/°                                         | 92.956(13)                                                                      |
| β/°                                         | 109.505(18)                                                                     |
| γ/°                                         | 102.27(2)                                                                       |
| Volume/Å <sup>3</sup>                       | 3853(6)                                                                         |
| Z                                           | 1                                                                               |
| ρ <sub>calc</sub> /cm <sup>3</sup>          | 1.437                                                                           |
| μ/mm <sup>-1</sup>                          | 1.683                                                                           |
| F(000)                                      | 1674.0                                                                          |
| Crystal size/mm <sup>3</sup>                | 0.86 × 0.557 × 0.206                                                            |
| Radiation                                   | MoK <sub>α</sub> (λ = 0.71073)                                                  |
| 2θ range for data collection/°              | 3.336 to 52.986                                                                 |
| Index ranges                                | -19 ≤ h ≤ 19, -20 ≤ k ≤ 20, -20 ≤ l ≤ 20                                        |
| Reflections collected                       | 58874                                                                           |
| Independent reflections                     | 15886 [R <sub>int</sub> = 0.0591, R <sub>sigma</sub> = 0.0512]                  |
| Data/restraints/parameters                  | 15886/251/816                                                                   |
| Goodness-of-fit on F <sup>2</sup>           | 1.174                                                                           |
| Final R indexes [I ≥ 2σ (I)]                | R <sub>1</sub> = 0.0552, wR <sub>2</sub> = 0.1173                               |
| Final R indexes [all data]                  | R <sub>1</sub> = 0.0806, wR <sub>2</sub> = 0.1432                               |
| Largest diff. peak/hole / e Å <sup>-3</sup> | 2.33/-1.35                                                                      |

**Refinement details:** The structure has disordered toluene solvent molecules. Therefore, necessary restraints and constraints were applied to all these disordered groups. More specifically, the similarity restraint SIMU and the rigid bond restraint RIGU have been applied, assuming that the atoms in these moieties move similarly in direction and magnitude. The same distances restraint SAME ensured similar geometries for all disordered residues of the same type. There are two disagreeable reflections [-1 0 1, -1 0 1], so OMIT instruction has been applied to remove them. OMIT has also been applied to ignore the reflection beyond 53°.

### Crystal data for 3·2C<sub>6</sub>H<sub>6</sub> (CCDC 2107317)

#### Table

|                                             |                                                                |
|---------------------------------------------|----------------------------------------------------------------|
| Empirical formula                           | C <sub>71</sub> H <sub>83</sub> Al <sub>2</sub> N <sub>4</sub> |
| Formula weight                              | 1046.37                                                        |
| Temperature/K                               | 100(2)                                                         |
| Crystal system                              | triclinic                                                      |
| Space group                                 | P-1                                                            |
| a/Å                                         | 13.438(2)                                                      |
| b/Å                                         | 15.123(3)                                                      |
| c/Å                                         | 15.478(2)                                                      |
| α/°                                         | 75.326(6)                                                      |
| β/°                                         | 80.106(11)                                                     |
| γ/°                                         | 84.764(7)                                                      |
| Volume/Å <sup>3</sup>                       | 2994.0(9)                                                      |
| Z                                           | 2                                                              |
| ρ <sub>calc</sub> /cm <sup>3</sup>          | 1.161                                                          |
| μ/mm <sup>-1</sup>                          | 0.094                                                          |
| F(000)                                      | 1126.0                                                         |
| Crystal size/mm <sup>3</sup>                | 0.649 × 0.464 × 0.408                                          |
| Radiation                                   | MoKα (λ = 0.71073)                                             |
| 2θ range for data collection/°              | 4.05 to 61.148                                                 |
| Index ranges                                | -19 ≤ h ≤ 19, -21 ≤ k ≤ 21, -21 ≤ l ≤ 22                       |
| Reflections collected                       | 115032                                                         |
| Independent reflections                     | 18206 [R <sub>int</sub> = 0.0282, R <sub>sigma</sub> = 0.0222] |
| Data/restraints/parameters                  | 18206/0/714                                                    |
| Goodness-of-fit on F <sup>2</sup>           | 1.030                                                          |
| Final R indexes [I >= 2σ (I)]               | R <sub>1</sub> = 0.0399, wR <sub>2</sub> = 0.1120              |
| Final R indexes [all data]                  | R <sub>1</sub> = 0.0423, wR <sub>2</sub> = 0.1143              |
| Largest diff. peak/hole / e Å <sup>-3</sup> | 0.49/-0.32                                                     |

**Refinement details:** There are some disagreeable reflections [0 -4 3, 6 3 9, 1 1 1, 0 -1 1, -1 1 3, -1 1 0, -1 -1 3, -1 1 2] which have been omitted.

### Crystal data for 4 (CCDC: 2107329)

#### Table

|                                             |                                                                |
|---------------------------------------------|----------------------------------------------------------------|
| Identification code                         | MaHa090_DeDh_a                                                 |
| Empirical formula                           | C <sub>68</sub> H <sub>80</sub> N <sub>4</sub> Al <sub>2</sub> |
| Formula weight                              | 1007.32                                                        |
| Temperature/K                               | 100.15                                                         |
| Crystal system                              | monoclinic                                                     |
| Space group                                 | I2/a                                                           |
| a/Å                                         | 16.9198(2)                                                     |
| b/Å                                         | 22.2833(2)                                                     |
| c/Å                                         | 17.4576(3)                                                     |
| $\alpha$ /°                                 | 90.0                                                           |
| $\beta$ /°                                  | 117.934(2)                                                     |
| $\gamma$ /°                                 | 90.0                                                           |
| Volume/Å <sup>3</sup>                       | 5815.16(14)                                                    |
| Z                                           | 4                                                              |
| $\rho_{\text{calc}}$ /cm <sup>3</sup>       | 1.151                                                          |
| $\mu$ /mm <sup>-1</sup>                     | 0.776                                                          |
| F(000)                                      | 2168.0                                                         |
| Crystal size/mm <sup>3</sup>                | 0.12 × 0.06 × 0.03                                             |
| Radiation                                   | Cu K $\alpha$ ( $\lambda$ = 1.54184)                           |
| 2 $\Theta$ range for data collection/°      | 6.0042 to 155.1518                                             |
| Index ranges                                | -21 ≤ h ≤ 15, -28 ≤ k ≤ 27, -21 ≤ l ≤ 22                       |
| Reflections collected                       | 33342                                                          |
| Independent reflections                     | 6108 [R <sub>int</sub> = 0.0281, R <sub>sigma</sub> = 0.0184]  |
| Data/restraints/parameters                  | 6108/0/344                                                     |
| Goodness-of-fit on F <sup>2</sup>           | 1.024                                                          |
| Final R indexes [I >= 2 $\sigma$ (I)]       | R <sub>1</sub> = 0.0384, wR <sub>2</sub> = 0.0984              |
| Final R indexes [all data]                  | R <sub>1</sub> = 0.0434, wR <sub>2</sub> = 0.1017              |
| Largest diff. peak/hole / e Å <sup>-3</sup> | 0.29/-0.24.                                                    |

**Crystal data for 5·2C<sub>6</sub>H<sub>6</sub> (CCDC: 2107337)****Table**

|                                             |                                                                |
|---------------------------------------------|----------------------------------------------------------------|
| Identification code                         | MaHa094_DeDh_a                                                 |
| Empirical formula                           | C <sub>78</sub> H <sub>91</sub> N <sub>4</sub> Al <sub>2</sub> |
| Formula weight                              | 1138.50                                                        |
| Temperature/K                               | 100.15                                                         |
| Crystal system                              | monoclinic                                                     |
| Space group                                 | P2 <sub>1</sub> /c                                             |
| a/Å                                         | 15.45280(10)                                                   |
| b/Å                                         | 15.23290(10)                                                   |
| c/Å                                         | 28.0296(3)                                                     |
| α/°                                         | 90                                                             |
| β/°                                         | 96.7420(10)                                                    |
| γ/°                                         | 90                                                             |
| Volume/Å <sup>3</sup>                       | 6552.29(9)                                                     |
| Z                                           | 4                                                              |
| ρ <sub>calc</sub> /cm <sup>3</sup>          | 1.154                                                          |
| μ/mm <sup>-1</sup>                          | 0.745                                                          |
| F(000)                                      | 2452.0                                                         |
| Crystal size/mm <sup>3</sup>                | 0.22 × 0.15 × 0.14                                             |
| Radiation                                   | CuKα (λ = 1.54184)                                             |
| 2θ range for data collection/°              | 5.76 to 154.556                                                |
| Index ranges                                | -19 ≤ h ≤ 19, -17 ≤ k ≤ 19, -26 ≤ l ≤ 35                       |
| Reflections collected                       | 49192                                                          |
| Independent reflections                     | 13342 [R <sub>int</sub> = 0.0406, R <sub>sigma</sub> = 0.0350] |
| Data/restraints/parameters                  | 13342/384/833                                                  |
| Goodness-of-fit on F <sup>2</sup>           | 1.033                                                          |
| Final R indexes [I ≥ 2σ (I)]                | R <sub>1</sub> = 0.0462, wR <sub>2</sub> = 0.1164              |
| Final R indexes [all data]                  | R <sub>1</sub> = 0.0526, wR <sub>2</sub> = 0.1207              |
| Largest diff. peak/hole / e Å <sup>-3</sup> | 0.32/-0.31                                                     |

**Refinement details:** The displacement parameters of atoms Al1 and Al2 of the residues 1 and 21 (MAIN) were constrained to the same value with the EADP keyword. The coordinates of atoms Al1 and Al2 of the residues 1 and 21 (MAIN) were made to the same value. The atomic displacement parameters of atoms Al1 to C9 of residues 1 and 21 (MAIN) were restrained with the RIGU keyword in ShelXL input ('enhanced rigid bond' restraint for all bonds in the connectivity list values of 0.004 for both parameters s1 and s2 were used). The displacement parameters of atoms Al1 to C9 of the residues 1 and 21 (MAIN) were restrained to the same value with similarity restraint SIMU.

**Crystal data for 8·C<sub>6</sub>H<sub>14</sub> (CCDC: 2107370)****Table**

| Data                                                           | MaHa139_DeDh_a                                                 |
|----------------------------------------------------------------|----------------------------------------------------------------|
| Empirical formula                                              | C <sub>68</sub> H <sub>88</sub> Al <sub>2</sub> N <sub>4</sub> |
| Formula weight (g·mol <sup>-1</sup> )                          | 1015.38                                                        |
| Temperature (K)                                                | 100.00(10)                                                     |
| Radiation, λ (Å)                                               | Cu <sub>Kα</sub> 1.54184                                       |
| Crystal system                                                 |                                                                |
| Space group                                                    | <i>P</i> $\bar{1}$                                             |
| <i>Unit cell dimensions</i>                                    |                                                                |
| <i>a</i> (Å)                                                   | 11.88400(10)                                                   |
| <i>b</i> (Å)                                                   | 15.41410(10)                                                   |
| <i>c</i> (Å)                                                   | 18.41380(10)                                                   |
| α (°)                                                          | 112.4900(10)                                                   |
| β (°)                                                          | 90.8700(10)                                                    |
| γ (°)                                                          | 105.4900(10)                                                   |
| Volume (Å <sup>3</sup> )                                       | 2977.13(4)                                                     |
| <i>Z</i>                                                       | 2                                                              |
| Calculated density (Mg·m <sup>-3</sup> )                       | 1.133                                                          |
| Absorption coefficient (mm <sup>-1</sup> )                     | 0.759                                                          |
| <i>F</i> (000)                                                 | 1100                                                           |
| Theta range for collection                                     | 2.620 to 74.804°                                               |
| Reflections collected                                          | 129644                                                         |
| Independent reflections                                        | 11861                                                          |
| Minimum/maximum transmission                                   | 0.82974/1.00000                                                |
| Refinement method                                              | Full-matrix least-squares on <i>F</i> <sup>2</sup>             |
| Data / parameters / restraints                                 | 11861 / 688 / 0                                                |
| Goodness-of-fit on <i>F</i> <sup>2</sup>                       | 1.079                                                          |
| Final R indices [ <i>I</i> >2σ( <i>I</i> )]                    | R <sub>1</sub> = 0.0423, wR <sup>2</sup> = 0.1159              |
| R indices (all data)                                           | R <sub>1</sub> = 0.0480, wR <sup>2</sup> = 0.1198              |
| Maximum/minimum residual electron density (e·Å <sup>-3</sup> ) | 0.571 / -0.744                                                 |



## 2. Computational chemistry

### 2.1. Computational details

All computations were carried out using the Gaussian 09 (Revision E.01) software.<sup>7</sup> Geometry optimizations and vibrational frequency calculations were performed in the gas phase using the dispersion corrected DFT functional theory, specifically the PBE1PBE functional,<sup>8</sup> def2-SVP basis set,<sup>9</sup> and Grimme's D3 correction (GD3) with Becke-Johnson damping (BJ).<sup>10</sup> A similar level of theory has been employed before for geometry optimizations and electronic structure calculations of low-valent aluminium compounds.<sup>11</sup> All geometry optimizations were performed without any symmetry constraints. Radicals and triplet state species were computed at the unrestricted level. Transition state geometries were obtained using opt = (ts, noeigentest, calcfc) algorithms.<sup>12</sup>

All optimized transition state structures were confirmed as maxima with only one imaginary frequency, and the magnitudes of all frequencies were verified to be greater than the residual frequencies due to rotations and translations. Additionally, each transition state established was ensured to be on the preferred reaction path by performing "plus-and-minus-displacement" minimization calculations, which involves the displacement of transition state structure by ca. 0.05 Å or 5° along the imaginary frequency normal mode in both directions,<sup>13</sup> and the displaced geometries were subsequently optimized to the nearest minimum. Zero-point vibrational energies and thermal corrections were obtained from frequency calculations with a standard state of 298 K and 1 atm. Single-point energies were computed on the PBE1PBE-D3BJ/def2-SVP optimized geometries using the PBE1PBE-D3BJ/def2-TZVP level of theory combined with the SMD solvation model (SCRF = SMD) for inclusion of the benzene solvent effect ( $\epsilon=2.2706$ ).<sup>14</sup> Dissociation energies computed for dialumenes, the dimers of alumylenes, also includes the counterpoise correction to avoid the basis set superposition error (BSSE).<sup>15</sup> The energies ( $\Delta G$ ) given are corrected for zero-point vibrational energies (ZPVEs).



## 2.2. Homocoupling of the radical [(NHC)Ar\*Al·]

1) Radical [(NHC)Ar\*Al·] (Ar\* = 2,6-C<sub>6</sub>H<sub>3</sub>Mes<sub>2</sub>, Mes = 2,4,6-Me<sub>3</sub>C<sub>6</sub>H<sub>2</sub>)

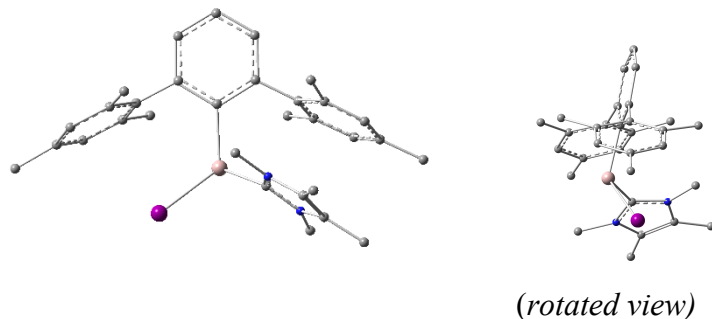

Hydrogen atoms are omitted for clarity.

Number of imaginary frequencies = 0

$E_{\text{total}} = -1850.759657$  a.u

$G_{\text{correction}} = 0.531945$  a.u

Cartesian coordinates:

|   |             |             |             |
|---|-------------|-------------|-------------|
| C | 0.46578300  | -1.47196500 | 0.24631600  |
| C | -0.66249700 | -2.28645000 | 0.52599600  |
| C | -0.52915100 | -3.49205500 | 1.22518900  |
| H | -1.42054100 | -4.09459300 | 1.42252400  |
| C | 0.72054800  | -3.93203000 | 1.65000600  |
| H | 0.81901900  | -4.87603600 | 2.19185200  |
| C | 1.84506800  | -3.16878200 | 1.35487700  |
| H | 2.83903800  | -3.51222100 | 1.65522100  |
| C | 1.72981500  | -1.95955300 | 0.65692300  |
| C | 2.98894100  | -1.23448100 | 0.31852900  |
| C | 3.53482400  | -1.36916400 | -0.97260900 |
| C | 4.71649400  | -0.69387300 | -1.28369200 |
| H | 5.13242700  | -0.79591900 | -2.29067300 |
| C | 5.37842400  | 0.10341000  | -0.34923600 |
| C | 4.83307000  | 0.20152800  | 0.93124200  |
| H | 5.33491000  | 0.82186800  | 1.68019300  |
| C | 3.64834600  | -0.44834900 | 1.28029600  |
| C | 3.05621700  | -0.23491800 | 2.64288300  |
| H | 2.23107600  | 0.49463900  | 2.58032600  |
| H | 3.80124800  | 0.17166400  | 3.34126100  |
| H | 2.64112800  | -1.15873900 | 3.06937700  |
| C | 6.61547700  | 0.86681100  | -0.72235400 |
| H | 7.18279300  | 0.35771000  | -1.51531500 |
| H | 7.28163500  | 1.00713800  | 0.14168000  |
| H | 6.35167000  | 1.86930900  | -1.09947000 |
| C | 2.86049900  | -2.22159400 | -2.00992500 |
| H | 3.50211900  | -2.35061400 | -2.89261500 |
| H | 1.91448800  | -1.76327000 | -2.34645600 |
| H | 2.60301600  | -3.21522700 | -1.61309700 |
| C | -2.03333600 | -1.92502100 | 0.05279300  |
| C | -2.38736700 | -2.14512600 | -1.29702600 |

|    |             |             |             |
|----|-------------|-------------|-------------|
| C  | -3.67863400 | -1.82687900 | -1.72152100 |
| H  | -3.94718100 | -2.00967200 | -2.76700700 |
| C  | -4.63561900 | -1.29357600 | -0.85284600 |
| C  | -4.27408100 | -1.10809300 | 0.48074700  |
| H  | -5.01136300 | -0.70914800 | 1.18463000  |
| C  | -2.99860400 | -1.43649400 | 0.95266100  |
| C  | -2.69994600 | -1.30241000 | 2.41843400  |
| H  | -2.94942000 | -2.23446800 | 2.95236000  |
| H  | -3.29703600 | -0.49845800 | 2.87419600  |
| H  | -1.63555100 | -1.11474200 | 2.60535900  |
| C  | -6.01851500 | -0.96802300 | -1.34186800 |
| H  | -5.99475400 | -0.32650900 | -2.23785900 |
| H  | -6.60955300 | -0.45357200 | -0.57049600 |
| H  | -6.56652800 | -1.88179500 | -1.62380400 |
| C  | -1.40753200 | -2.74598300 | -2.26345400 |
| H  | -1.90197500 | -3.02779000 | -3.20343400 |
| H  | -0.92286400 | -3.63666700 | -1.83688200 |
| H  | -0.59861700 | -2.03384500 | -2.50277600 |
| Al | 0.24058500  | 0.20880300  | -0.83361200 |
| C  | -1.42526400 | 1.16290400  | -0.10641500 |
| N  | -1.63653800 | 1.58130800  | 1.15824700  |
| C  | -2.85044800 | 2.23814500  | 1.27438700  |
| C  | -3.41137500 | 2.22333100  | 0.02659700  |
| N  | -2.51014500 | 1.56797400  | -0.79482000 |
| C  | -2.68766200 | 1.39811400  | -2.21828000 |
| H  | -1.85377100 | 0.78794600  | -2.59491900 |
| H  | -2.67306200 | 2.37491600  | -2.72410800 |
| H  | -3.63210900 | 0.88080700  | -2.42800100 |
| C  | -4.71331200 | 2.73524600  | -0.46398300 |
| H  | -4.58699500 | 3.45477100  | -1.28822900 |
| H  | -5.25351700 | 3.24460700  | 0.34411000  |
| H  | -5.35148400 | 1.91536500  | -0.83067700 |
| C  | -3.34796400 | 2.79966900  | 2.55411500  |
| H  | -4.31162400 | 3.30147200  | 2.39925700  |
| H  | -2.64904600 | 3.53977500  | 2.97459000  |
| H  | -3.49933300 | 2.01586300  | 3.31424400  |
| C  | -0.66592600 | 1.45213200  | 2.22162500  |
| H  | -0.03467100 | 2.35143900  | 2.27809600  |
| H  | -0.02229300 | 0.58890900  | 2.00962000  |
| H  | -1.17645400 | 1.28928600  | 3.17845800  |
| I  | 1.85597600  | 2.20693500  | -0.54341500 |

2) Diiododialane [(NHC)(I)Ar\*Al–AlAr\*(I)(NHC)] (Ar\* = 2,6-C<sub>6</sub>H<sub>3</sub>Mes<sub>2</sub>, Mes = 2,4,6-Me<sub>3</sub>C<sub>6</sub>H<sub>2</sub>)

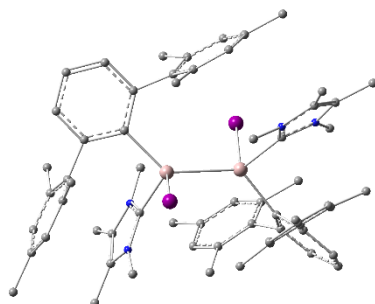

Hydrogen atoms are omitted for clarity.

Number of imaginary frequencies = 0

$E_{\text{total}} = -3701.620088$  a.u

$G_{\text{correction}} = 1.103474$  a.u

Cartesian coordinates:

|    |             |             |             |
|----|-------------|-------------|-------------|
| C  | 1.89033600  | 1.97995100  | -1.40856900 |
| C  | 2.73763000  | 1.53005300  | -2.46306000 |
| C  | 3.42398700  | 2.42753300  | -3.29507500 |
| H  | 4.04398800  | 2.02789400  | -4.10175800 |
| C  | 3.30493700  | 3.79933900  | -3.12872700 |
| H  | 3.85068900  | 4.49172800  | -3.77450900 |
| C  | 2.43452600  | 4.26914100  | -2.15709400 |
| H  | 2.26556900  | 5.34392400  | -2.04768400 |
| C  | 1.72010300  | 3.38966900  | -1.32752900 |
| C  | 0.69064300  | 4.08737700  | -0.49850300 |
| C  | -0.64196700 | 4.06889400  | -0.95047100 |
| C  | -1.59378000 | 4.86564300  | -0.30829300 |
| H  | -2.61262500 | 4.87958400  | -0.70383000 |
| C  | -1.26801000 | 5.66768900  | 0.78654200  |
| C  | 0.06343000  | 5.68595900  | 1.20590300  |
| H  | 0.34993400  | 6.32133900  | 2.04956100  |
| C  | 1.05146100  | 4.93720200  | 0.56494400  |
| C  | -2.30797100 | 6.49082000  | 1.49180000  |
| H  | -3.19201000 | 6.65592000  | 0.85856300  |
| H  | -1.91229200 | 7.47494700  | 1.78452600  |
| H  | -2.64977800 | 5.99731200  | 2.41794200  |
| C  | 2.89007400  | 0.10030700  | -2.87381900 |
| C  | 1.79954800  | -0.54551800 | -3.49720000 |
| C  | 1.96888700  | -1.82908200 | -4.02079000 |
| H  | 1.11432100  | -2.31655600 | -4.49685200 |
| C  | 3.19050800  | -2.50155600 | -3.94972400 |
| C  | 4.26853400  | -1.83240700 | -3.36782600 |
| H  | 5.24654500  | -2.32371200 | -3.33303600 |
| C  | 4.14811800  | -0.53698100 | -2.85426000 |
| C  | 5.38906400  | 0.16110800  | -2.37143400 |
| H  | 5.90526400  | 0.65734900  | -3.20999800 |
| H  | 6.09694300  | -0.55520600 | -1.93100600 |
| H  | 5.16546600  | 0.94148900  | -1.63527700 |
| C  | 3.32430800  | -3.90615200 | -4.46080900 |
| H  | 2.87686500  | -4.62513300 | -3.75373700 |
| H  | 4.37758300  | -4.18869100 | -4.60201100 |
| H  | 2.80222000  | -4.03666400 | -5.42057900 |
| C  | 0.49027900  | 0.16396500  | -3.68235300 |
| H  | -0.17871800 | -0.41653600 | -4.33096100 |
| H  | 0.64407100  | 1.16307500  | -4.11769500 |
| H  | -0.02544200 | 0.30918500  | -2.72158000 |
| Al | 1.23845800  | 0.62884300  | 0.03223000  |
| C  | 3.05570200  | -0.36434900 | 0.29429600  |
| N  | 4.23479000  | 0.16884000  | 0.69741400  |
| C  | 5.22528100  | -0.79494700 | 0.76592100  |
| C  | 4.64660000  | -1.96621500 | 0.36328300  |
| N  | 3.32677800  | -1.66779400 | 0.09437300  |
| C  | 2.38968500  | -2.60868800 | -0.46406900 |
| H  | 1.37814700  | -2.31109300 | -0.17956900 |
| H  | 2.58118800  | -3.61165600 | -0.07144400 |

|    |             |             |             |
|----|-------------|-------------|-------------|
| H  | 2.45874000  | -2.61277600 | -1.55895600 |
| C  | 5.22552400  | -3.31801700 | 0.17404100  |
| H  | 4.73915100  | -4.06843600 | 0.81676900  |
| H  | 6.29539200  | -3.31166200 | 0.41893000  |
| H  | 5.11880700  | -3.65328000 | -0.86985000 |
| C  | 6.61721000  | -0.49982100 | 1.18270000  |
| H  | 7.19942600  | -1.42862700 | 1.23671700  |
| H  | 6.65511600  | -0.02458100 | 2.17550300  |
| H  | 7.12633600  | 0.17226000  | 0.47190100  |
| C  | 4.48092600  | 1.56938800  | 0.95686300  |
| H  | 4.35658800  | 1.80527100  | 2.02288300  |
| H  | 3.76792300  | 2.16914300  | 0.38029600  |
| H  | 5.49792300  | 1.82299100  | 0.63102700  |
| Al | -1.08215300 | -0.81479200 | 0.10026100  |
| C  | -2.01728600 | -1.89681900 | 1.60689200  |
| C  | -2.53838700 | 0.59435700  | -0.42709500 |
| C  | -3.40676200 | -2.22434100 | 1.57273900  |
| C  | -1.30200700 | -2.43735700 | 2.70885100  |
| N  | -2.91455700 | 1.55472300  | 0.44960100  |
| N  | -3.28114200 | 0.83827600  | -1.53038200 |
| C  | -4.01103400 | -2.99592500 | 2.57544500  |
| C  | -4.36628200 | -1.82836500 | 0.49359800  |
| C  | -1.92840500 | -3.20417400 | 3.70435200  |
| C  | 0.16925600  | -2.30015500 | 2.92662300  |
| C  | -3.89588200 | 2.37341000  | -0.07607900 |
| C  | -4.12483900 | 1.91856300  | -1.34348400 |
| H  | -5.07914800 | -3.21678100 | 2.49120500  |
| C  | -3.28411900 | -3.48444200 | 3.65088400  |
| C  | -4.58246500 | -2.68198400 | -0.60803600 |
| C  | -5.21789300 | -0.72466600 | 0.68575300  |
| H  | -1.31876600 | -3.58903700 | 4.52693100  |
| C  | 1.03361300  | -3.29304300 | 2.42764200  |
| C  | 0.65680600  | -1.33413200 | 3.82589300  |
| C  | -4.53833300 | 3.46523800  | 0.69517400  |
| C  | -5.06120100 | 2.39588300  | -2.38777800 |
| H  | -3.76536400 | -4.08414100 | 4.42746000  |
| C  | -5.51798000 | -2.31409400 | -1.57836900 |
| C  | -3.95871800 | -4.04585800 | -0.66434300 |
| C  | -6.15101700 | -0.39382200 | -0.30158300 |
| C  | -5.21870900 | 0.01685200  | 1.99019800  |
| C  | 2.38856500  | -3.24270600 | 2.76784600  |
| C  | 2.02166800  | -1.30071400 | 4.11524800  |
| H  | -5.15612300 | 4.08641500  | 0.03356600  |
| H  | -3.79402400 | 4.11761800  | 1.17138200  |
| H  | -5.19315900 | 3.07077600  | 1.48903200  |
| H  | -4.53437400 | 2.65764500  | -3.31919500 |
| H  | -5.59276500 | 3.29095200  | -2.04012600 |
| H  | -5.81433600 | 1.63116000  | -2.63332000 |
| H  | -5.66461900 | -2.97292100 | -2.44026400 |
| C  | -6.29793700 | -1.16124900 | -1.45786500 |
| H  | -3.84274000 | -4.39515600 | -1.69937200 |
| H  | -4.61279700 | -4.76116000 | -0.13540900 |
| H  | -2.97702600 | -4.07716400 | -0.17910100 |
| H  | -6.79728200 | 0.47632200  | -0.14843900 |
| H  | -5.83011300 | -0.52665300 | 2.72997600  |
| H  | -5.65236700 | 1.02076400  | 1.88475400  |
| H  | -4.21529400 | 0.09211600  | 2.42541400  |

|   |             |             |             |
|---|-------------|-------------|-------------|
| H | 3.05524600  | -4.02712100 | 2.39571700  |
| C | 2.90825500  | -2.24092800 | 3.58888600  |
| H | 2.39786700  | -0.52101100 | 4.78354000  |
| C | -7.29542200 | -0.79670300 | -2.52123300 |
| H | -6.80132300 | -0.55259900 | -3.47696400 |
| H | -7.90240400 | 0.07142200  | -2.22611700 |
| H | -7.98307800 | -1.63164100 | -2.72874600 |
| I | -0.95689500 | -2.65640500 | -1.81941000 |
| I | 1.29196900  | 1.92149600  | 2.34736100  |
| C | -3.21511800 | 0.12417800  | -2.78323000 |
| H | -2.61323000 | -0.78140800 | -2.65370200 |
| H | -4.22389200 | -0.17133800 | -3.09660200 |
| H | -2.75490700 | 0.75791800  | -3.55669400 |
| C | -2.30017000 | 1.79092900  | 1.73535000  |
| H | -1.74134000 | 0.89984800  | 2.04313900  |
| H | -1.59804500 | 2.63461000  | 1.67506300  |
| H | -3.06811200 | 1.99731300  | 2.49119400  |
| C | -1.02832200 | 3.27513500  | -2.16445200 |
| H | -0.91935100 | 2.19576700  | -1.98907200 |
| H | -2.06993200 | 3.47715600  | -2.44897400 |
| H | -0.37629400 | 3.51573700  | -3.01802500 |
| C | 2.48248100  | 5.08958700  | 0.99134700  |
| H | 3.00512900  | 5.82896600  | 0.36164000  |
| H | 2.54747400  | 5.42910900  | 2.03453700  |
| H | 3.02849500  | 4.14231400  | 0.90729100  |
| C | -0.28977100 | -0.41649500 | 4.54204200  |
| H | 0.24672000  | 0.40365500  | 5.03632400  |
| H | -1.03068400 | 0.02010900  | 3.86023700  |
| H | -0.85654400 | -0.97573200 | 5.30524200  |
| C | 4.36832000  | -2.18799000 | 3.93619800  |
| H | 4.53076900  | -2.36303400 | 5.01226600  |
| H | 4.94503500  | -2.94271400 | 3.38257700  |
| H | 4.79358800  | -1.19950300 | 3.70214700  |
| C | 0.49084300  | -4.43538400 | 1.61725300  |
| H | 1.29259400  | -5.11897400 | 1.30230000  |
| H | -0.23748000 | -5.01605000 | 2.20509000  |
| H | -0.04527300 | -4.09171800 | 0.71891700  |

## 2.3. Free energy differences among selected experimental compounds

### 3) Masked dialumene **3**

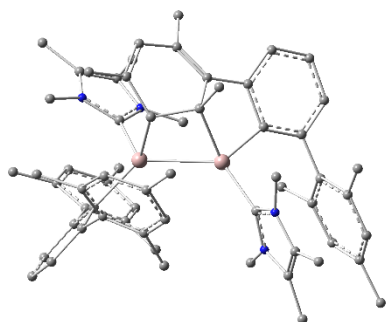

Hydrogen atoms are omitted for clarity.

Number of imaginary frequencies = 0

$E_{\text{total}} = -3106.010239$  a.u

$G_{\text{correction}} = 1.109388$  a.u

Cartesian coordinates:

|   |             |             |             |
|---|-------------|-------------|-------------|
| C | -1.65420700 | -1.53546000 | 1.72554900  |
| C | -2.56539300 | -2.59504400 | 1.57872900  |
| C | -2.64766400 | -3.61367500 | 2.53995400  |
| H | -3.37190200 | -4.42357200 | 2.40924400  |
| C | -1.83469800 | -3.57566700 | 3.67128400  |
| H | -1.93024500 | -4.34877400 | 4.43872000  |
| C | -0.91899200 | -2.54087900 | 3.83791000  |
| H | -0.32518600 | -2.49464900 | 4.75210200  |
| C | -0.79477300 | -1.53200700 | 2.86525800  |
| C | 1.99864100  | 1.53218200  | -1.69441500 |
| C | 2.71387600  | 0.79600500  | -2.67685400 |
| C | 3.17649500  | 1.40580500  | -3.85267900 |
| H | 3.71861500  | 0.80030800  | -4.58508100 |
| C | 2.94371800  | 2.75311800  | -4.10302400 |
| H | 3.30948900  | 3.21751400  | -5.02237100 |
| C | 2.21756500  | 3.49304400  | -3.17622100 |
| H | 1.99494200  | 4.54765200  | -3.36446600 |
| C | 1.74692100  | 2.89431900  | -2.00207600 |
| C | -3.50626800 | -2.66889400 | 0.42069600  |
| C | -4.73726900 | -1.99021400 | 0.47339100  |
| C | -5.63481700 | -2.11066600 | -0.59389600 |
| H | -6.58694300 | -1.57259200 | -0.54601300 |
| C | -5.36012000 | -2.91476900 | -1.70129100 |
| C | -4.13421000 | -3.58769200 | -1.73303800 |
| H | -3.89065300 | -4.21763700 | -2.59474900 |
| C | -3.19995000 | -3.46533700 | -0.70149300 |
| C | -1.86724500 | -4.14878600 | -0.80585000 |
| H | -1.82753400 | -4.81873400 | -1.67651100 |
| H | -1.63769000 | -4.72944700 | 0.09942400  |
| H | -1.06154000 | -3.40441300 | -0.90781800 |
| C | -5.10145900 | -1.17317600 | 1.67890700  |
| H | -5.97325300 | -0.53276500 | 1.47937600  |
| H | -4.25755000 | -0.54961200 | 2.00508700  |
| H | -5.34460700 | -1.82732400 | 2.53187900  |

|   |             |             |             |
|---|-------------|-------------|-------------|
| C | -6.34621400 | -3.06203500 | -2.82550100 |
| H | -5.88998800 | -2.82361300 | -3.79992700 |
| H | -7.21575700 | -2.40329600 | -2.68782700 |
| H | -6.72126100 | -4.09604100 | -2.89473100 |
| C | 0.90694400  | 3.72106900  | -1.08800100 |
| C | -0.49410700 | 3.60523800  | -1.15666000 |
| C | -1.28030700 | 4.31528800  | -0.24679000 |
| H | -2.36840400 | 4.21372500  | -0.30450200 |
| C | -0.71606900 | 5.15416500  | 0.71656400  |
| C | 0.67122200  | 5.31746400  | 0.71138100  |
| H | 1.13263000  | 5.99749200  | 1.43401600  |
| C | 1.49078700  | 4.62479600  | -0.18373600 |
| C | 2.97439800  | 4.85500100  | -0.19432900 |
| H | 3.52818300  | 3.90535200  | -0.22811200 |
| H | 3.29929900  | 5.42397900  | 0.68754400  |
| H | 3.27901200  | 5.41730700  | -1.09181900 |
| C | -1.57134800 | 5.83799000  | 1.74316800  |
| H | -2.59038500 | 6.01648600  | 1.36785500  |
| H | -1.14698300 | 6.80569500  | 2.04850900  |
| H | -1.65678900 | 5.21905000  | 2.65297100  |
| C | -1.13007300 | 2.76227300  | -2.22253400 |
| H | -2.22563200 | 2.84542300  | -2.19128800 |
| H | -0.85188000 | 1.70496800  | -2.09445000 |
| H | -0.78131700 | 3.06537400  | -3.22173400 |
| C | 2.97193300  | -0.67389200 | -2.56571500 |
| C | 1.92352800  | -1.58466400 | -2.81747200 |
| C | 2.17599500  | -2.95527900 | -2.76226200 |
| H | 1.35376600  | -3.64954200 | -2.96445900 |
| C | 3.44226600  | -3.46255100 | -2.45798900 |
| C | 4.47091300  | -2.54937700 | -2.23514600 |
| H | 5.47514400  | -2.92073100 | -2.00722000 |
| C | 4.26416500  | -1.16731500 | -2.31076200 |
| C | 5.43818400  | -0.24356800 | -2.15693900 |
| H | 5.95823200  | -0.11109000 | -3.12041900 |
| H | 6.17380700  | -0.65142800 | -1.44726100 |
| H | 5.13131800  | 0.75596900  | -1.82634900 |
| C | 3.68656900  | -4.94434200 | -2.41767200 |
| H | 2.89283600  | -5.47275100 | -1.86611900 |
| H | 4.64957200  | -5.18330900 | -1.94355900 |
| H | 3.70559100  | -5.37222500 | -3.43386400 |
| C | 0.55230800  | -1.08738200 | -3.15973400 |
| H | -0.12217400 | -1.91977400 | -3.40705500 |
| H | 0.58021100  | -0.38654500 | -4.00829300 |
| H | 0.12837900  | -0.53381000 | -2.30491500 |
| C | 0.17579300  | -0.41914700 | 2.95859100  |
| C | 1.42441500  | -0.49507300 | 3.52059700  |
| C | 2.24352300  | 0.70614900  | 3.59444700  |
| H | 3.08903800  | 0.70808600  | 4.29232300  |
| C | 2.00528800  | 1.78937700  | 2.80657000  |
| C | 0.91423400  | 1.70836900  | 1.82066800  |
| H | 0.59027700  | 2.71199000  | 1.49841500  |
| C | -0.29520700 | 0.92709200  | 2.38892200  |
| C | -0.98009000 | 1.67754900  | 3.53685600  |
| H | -1.30370200 | 2.68607700  | 3.22456800  |
| H | -0.29250000 | 1.81440800  | 4.39214500  |
| H | -1.85981200 | 1.12937300  | 3.91731600  |
| C | 2.05664700  | -1.74166700 | 4.07922000  |

|    |             |             |             |
|----|-------------|-------------|-------------|
| H  | 1.61073000  | -2.66112100 | 3.67629000  |
| H  | 1.96265600  | -1.79199800 | 5.17861400  |
| H  | 3.13459800  | -1.75305300 | 3.85211900  |
| C  | 2.80754100  | 3.04441600  | 2.93836400  |
| H  | 3.21165800  | 3.37051200  | 1.96814800  |
| H  | 3.64189400  | 2.93610600  | 3.64905200  |
| H  | 2.16388800  | 3.86958800  | 3.28912300  |
| Al | 1.23500800  | 0.69534800  | 0.01692500  |
| Al | -1.20107600 | 0.14247900  | 0.73690000  |
| C  | 2.67927500  | -0.70458300 | 0.52109800  |
| N  | 3.95348800  | -0.42740700 | 0.87096100  |
| C  | 4.63685500  | -1.57035200 | 1.25328500  |
| C  | 3.74783800  | -2.60014400 | 1.12820500  |
| N  | 2.56488900  | -2.03851800 | 0.68230100  |
| C  | 1.34330200  | -2.78418100 | 0.49990700  |
| H  | 0.58751200  | -2.10065700 | 0.09062300  |
| H  | 0.96934100  | -3.15692100 | 1.46392200  |
| H  | 1.50473100  | -3.61877600 | -0.19384500 |
| C  | 3.89241500  | -4.05152900 | 1.38697800  |
| H  | 3.17809300  | -4.39834100 | 2.15067000  |
| H  | 4.90492800  | -4.27885600 | 1.74472700  |
| H  | 3.71730900  | -4.64053200 | 0.47301800  |
| C  | 6.04819800  | -1.55115300 | 1.70795000  |
| H  | 6.37181800  | -2.56272300 | 1.98518600  |
| H  | 6.18205700  | -0.90340500 | 2.58940300  |
| H  | 6.73106300  | -1.18607800 | 0.92330300  |
| C  | 4.52047700  | 0.89749400  | 0.91922700  |
| H  | 3.85499200  | 1.58137500  | 0.37885200  |
| H  | 5.50627300  | 0.90843000  | 0.43786600  |
| H  | 4.60968900  | 1.23549300  | 1.95949300  |
| C  | -2.94125500 | 0.87737200  | -0.10645000 |
| N  | -3.42040200 | 0.53383600  | -1.31935200 |
| C  | -4.60793200 | 1.18103500  | -1.60511800 |
| C  | -4.87863800 | 1.97093800  | -0.52131400 |
| N  | -3.84220900 | 1.76140200  | 0.37395600  |
| C  | -3.77202400 | 2.36093700  | 1.68297900  |
| H  | -4.65358300 | 2.08466400  | 2.27959300  |
| H  | -3.71130500 | 3.45618900  | 1.61078000  |
| H  | -2.87130700 | 1.99228100  | 2.18274500  |
| C  | -6.01154200 | 2.88545300  | -0.23790700 |
| H  | -6.70387400 | 2.90903400  | -1.08919000 |
| H  | -5.66929600 | 3.91675000  | -0.05569700 |
| H  | -6.58222000 | 2.56613300  | 0.64928600  |
| C  | -5.35468800 | 0.95484000  | -2.86552400 |
| H  | -5.63354500 | -0.10561900 | -2.97180800 |
| H  | -4.75997400 | 1.23473800  | -3.74947400 |
| H  | -6.27621200 | 1.55079300  | -2.87850300 |
| C  | -2.78316800 | -0.40629100 | -2.20688200 |
| H  | -3.44594100 | -1.26009300 | -2.39416800 |
| H  | -1.86869500 | -0.76637300 | -1.71968700 |
| H  | -2.51041800 | 0.08105000  | -3.15410900 |

#### 4) Dialumene 6



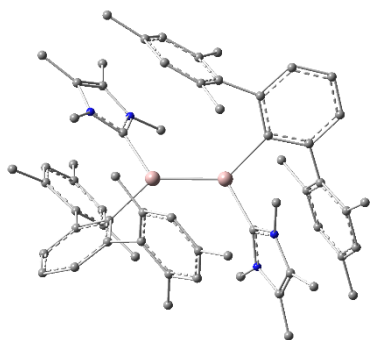

Hydrogen atoms are omitted for clarity.

Number of imaginary frequencies = 0

$E_{\text{total}} = -3105.987663 \text{ a.u.}$

$G_{\text{correction}} = 1.107864 \text{ a.u.}$

$\text{BSSE}_{\text{correction}} = 0.001372124 \text{ a.u.}$

Cartesian coordinates:

|   |             |            |             |
|---|-------------|------------|-------------|
| C | -1.63079600 | 2.45833000 | 0.14831300  |
| C | -2.70765400 | 2.83101100 | 1.00030100  |
| C | -3.18894300 | 4.14711700 | 1.02898400  |
| H | -4.01006500 | 4.39902100 | 1.70613900  |
| C | -2.62357800 | 5.13237700 | 0.22726900  |
| H | -3.01024500 | 6.15447400 | 0.24876800  |
| C | -1.54064500 | 4.80404200 | -0.58140200 |
| H | -1.06058600 | 5.57155300 | -1.19569300 |
| C | -1.03903100 | 3.49508400 | -0.61592400 |
| C | 0.19662800  | 3.31688500 | -1.44558600 |
| C | 1.42837400  | 3.70382500 | -0.88208400 |
| C | 2.56958800  | 3.75309900 | -1.68725800 |
| H | 3.51448900  | 4.07804600 | -1.24120000 |
| C | 2.52653500  | 3.42910500 | -3.04438500 |
| C | 1.30350300  | 3.01316700 | -3.57733800 |
| H | 1.24480900  | 2.74419000 | -4.63686300 |
| C | 0.14150900  | 2.95213000 | -2.80523600 |
| C | -1.13607800 | 2.47243900 | -3.41967100 |
| H | -1.99763100 | 3.06869900 | -3.08494100 |
| H | -1.31401000 | 1.42791900 | -3.10327100 |
| H | -1.09119900 | 2.49665100 | -4.51777900 |
| C | 3.75223600  | 3.51665300 | -3.90950300 |
| H | 4.53191800  | 4.13538400 | -3.44148900 |
| H | 3.51943100  | 3.95538100 | -4.89158100 |
| H | 4.18859200  | 2.52131500 | -4.10191500 |
| C | 1.51195600  | 4.09431100 | 0.56589300  |
| H | 2.55891700  | 4.15354800 | 0.89686500  |
| H | 0.97603300  | 3.37113500 | 1.19777900  |
| H | 1.03826300  | 5.07233000 | 0.74769200  |
| C | -3.33887500 | 1.87171500 | 1.95829800  |
| C | -2.60980600 | 1.42151300 | 3.08392900  |
| C | -3.22309800 | 0.56434900 | 3.99790300  |
| H | -2.64834700 | 0.22711800 | 4.86657100  |
| C | -4.53951800 | 0.12267600 | 3.83696300  |
| C | -5.25292300 | 0.60181800 | 2.74020500  |
| H | -6.29254800 | 0.28855300 | 2.60039400  |

|    |             |             |             |
|----|-------------|-------------|-------------|
| C  | -4.68779800 | 1.48981700  | 1.81821500  |
| C  | -5.55843400 | 2.04027800  | 0.72418300  |
| H  | -6.03866100 | 2.98123900  | 1.04046700  |
| H  | -6.36475900 | 1.33567000  | 0.47409600  |
| H  | -4.98937800 | 2.27407300  | -0.18340200 |
| C  | -5.16104800 | -0.82040700 | 4.82770200  |
| H  | -4.58286600 | -1.75517500 | 4.91643500  |
| H  | -6.18884700 | -1.08647700 | 4.54142500  |
| H  | -5.19952700 | -0.37617800 | 5.83551500  |
| C  | -1.19290700 | 1.85212900  | 3.31288700  |
| H  | -0.87534400 | 1.63499600  | 4.34295000  |
| H  | -1.05956800 | 2.92569700  | 3.11449000  |
| H  | -0.52240100 | 1.30939500  | 2.62029900  |
| Al | -1.04127700 | 0.55196000  | -0.12579700 |
| C  | -2.77684200 | -0.51273000 | -0.02529900 |
| N  | -3.85481600 | -0.33838100 | -0.82651400 |
| C  | -4.87727800 | -1.21355200 | -0.50360600 |
| C  | -4.41882300 | -1.95753700 | 0.54795600  |
| N  | -3.13538000 | -1.51419000 | 0.81334400  |
| C  | -2.33279100 | -2.01309700 | 1.90441400  |
| H  | -1.39193300 | -1.43717600 | 1.92028400  |
| H  | -2.09484500 | -3.07494100 | 1.75768500  |
| H  | -2.86593900 | -1.87686200 | 2.85491800  |
| C  | -5.07571500 | -3.01831700 | 1.34834700  |
| H  | -4.48956200 | -3.95118100 | 1.34992000  |
| H  | -6.07002800 | -3.24647500 | 0.94310900  |
| H  | -5.20389500 | -2.70500600 | 2.39718700  |
| C  | -6.18029700 | -1.25469000 | -1.21182700 |
| H  | -6.81376000 | -2.04400300 | -0.78683200 |
| H  | -6.05833800 | -1.46626500 | -2.28506800 |
| H  | -6.72926400 | -0.30355800 | -1.11906900 |
| C  | -3.86491300 | 0.58621900  | -1.93491700 |
| H  | -3.26654800 | 0.18215100  | -2.76397500 |
| H  | -3.42838600 | 1.54241200  | -1.61955300 |
| H  | -4.89558600 | 0.75716600  | -2.26700100 |
| Al | 1.01931500  | -0.63522000 | 0.06740900  |
| C  | 1.67542000  | -2.40982100 | -0.60896700 |
| C  | 2.71739300  | 0.48174900  | 0.26862800  |
| C  | 2.83451500  | -3.01609400 | -0.04727000 |
| C  | 1.06010200  | -3.09608400 | -1.68676700 |
| N  | 3.68277200  | 0.70110800  | -0.65218900 |
| N  | 3.14371700  | 1.14046300  | 1.37151000  |
| C  | 3.37302300  | -4.19336300 | -0.58214800 |
| C  | 3.50067200  | -2.45520900 | 1.16749900  |
| C  | 1.62276400  | -4.26444500 | -2.21859100 |
| C  | -0.26136400 | -2.70462800 | -2.27387100 |
| C  | 4.70013400  | 1.49012500  | -0.14570500 |
| C  | 3.58986700  | 0.24950000  | -2.02042500 |
| C  | 4.35857400  | 1.76390000  | 1.15042900  |
| C  | 2.44816000  | 1.16227600  | 2.63491000  |
| H  | 4.25952900  | -4.63423200 | -0.11700500 |
| C  | 2.78504700  | -4.80996300 | -1.68132800 |
| C  | 2.86000400  | -2.54107400 | 2.42661800  |
| C  | 4.79916500  | -1.91413000 | 1.09432800  |
| H  | 1.12552700  | -4.75521500 | -3.06060200 |
| C  | -1.41239100 | -3.34985300 | -1.78442800 |
| C  | -0.36774500 | -1.85007600 | -3.38969700 |

|   |             |             |             |
|---|-------------|-------------|-------------|
| C | 5.88187700  | 1.90699800  | -0.93935600 |
| H | 3.02020700  | 0.97597900  | -2.61729000 |
| H | 3.06776700  | -0.71437500 | -2.04083700 |
| H | 4.59539500  | 0.12419300  | -2.44013800 |
| C | 5.06963800  | 2.52354800  | 2.20662700  |
| H | 1.60357800  | 0.45848300  | 2.56095300  |
| H | 2.05692800  | 2.16771700  | 2.84834300  |
| H | 3.12081200  | 0.84367900  | 3.44155500  |
| H | 3.21519100  | -5.72248000 | -2.10181700 |
| C | 3.49884400  | -2.02708400 | 3.55496100  |
| C | 1.51519700  | -3.19098900 | 2.56990900  |
| C | 5.39258300  | -1.38598000 | 2.24665300  |
| C | 5.58670700  | -1.91820300 | -0.18513200 |
| C | -2.64044000 | -3.15223400 | -2.42345900 |
| C | -1.31894200 | -4.29933400 | -0.62411500 |
| C | -1.60774400 | -1.69202700 | -4.01153800 |
| C | 0.81889100  | -1.08983700 | -3.89414700 |
| H | 6.53115400  | 2.55702500  | -0.33862000 |
| H | 5.58922100  | 2.46566700  | -1.84172900 |
| H | 6.48533100  | 1.04409600  | -1.26511100 |
| H | 4.44122900  | 3.32490000  | 2.62689600  |
| H | 5.97826800  | 2.98703900  | 1.80099900  |
| H | 5.37054900  | 1.86651600  | 3.03902800  |
| H | 2.99333600  | -2.10155100 | 4.52320400  |
| C | 4.75917300  | -1.42451300 | 3.48688200  |
| H | 1.28574000  | -3.39400100 | 3.62554900  |
| H | 1.46198200  | -4.13257000 | 2.00385300  |
| H | 0.72925200  | -2.52745000 | 2.16389500  |
| H | 6.39019500  | -0.94171500 | 2.16905500  |
| H | 6.19299700  | -2.83576000 | -0.26851300 |
| H | 6.28247400  | -1.06718300 | -0.22057000 |
| H | 4.93835900  | -1.89376300 | -1.06892100 |
| H | -3.52542400 | -3.66813900 | -2.03879400 |
| C | -2.75522400 | -2.34847200 | -3.55661800 |
| H | -2.31597200 | -4.52548700 | -0.21831000 |
| H | -0.68573100 | -3.89227300 | 0.17670100  |
| H | -0.85469300 | -5.25162600 | -0.92782000 |
| H | -1.67318800 | -1.04727000 | -4.89426700 |
| H | 1.73146000  | -1.70356100 | -3.88305100 |
| H | 0.98952200  | -0.22143800 | -3.23283300 |
| H | 0.65490700  | -0.71728000 | -4.91546600 |
| C | 5.40833100  | -0.85982100 | 4.71850700  |
| C | -4.05867000 | -2.21664800 | -4.29262200 |
| H | 4.79479100  | -0.06425700 | 5.17358800  |
| H | 6.39737300  | -0.43447600 | 4.49462800  |
| H | 5.54445500  | -1.63340500 | 5.49131100  |
| H | -4.85240700 | -2.80526700 | -3.81047500 |
| H | -3.96544000 | -2.57436700 | -5.33053800 |
| H | -4.39822500 | -1.16945900 | -4.34917900 |

5) Alumylene 7 ( $[(\text{NHC})\text{Ar}^*\text{Al}]$  ( $\text{Ar}^* = 2,6\text{-C}_6\text{H}_3\text{Mes}_2$ ,  $\text{Mes} = 2,4,6\text{-Me}_3\text{C}_6\text{H}_2$ ))

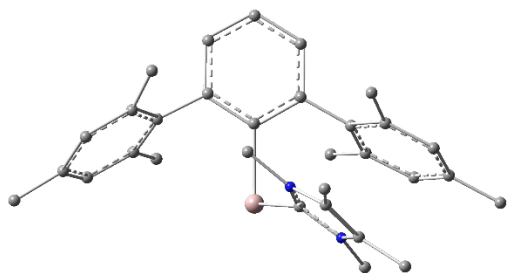

Hydrogen atoms are omitted for clarity.

Number of imaginary frequencies = 0

$E_{\text{total}} = -1552.947063$  a.u

$G_{\text{correction}} = 0.532312$  a.u

Cartesian coordinates:

|   |             |             |             |
|---|-------------|-------------|-------------|
| C | 0.72120600  | -1.07724100 | 0.31590700  |
| C | -0.31976700 | -1.79502100 | 0.94954500  |
| C | -0.07187100 | -2.63572500 | 2.04093300  |
| H | -0.90482700 | -3.17317500 | 2.50465100  |
| C | 1.22250800  | -2.79326800 | 2.52979000  |
| H | 1.41547500  | -3.45379800 | 3.37890000  |
| C | 2.26891500  | -2.10760700 | 1.91987900  |
| H | 3.29231600  | -2.22816300 | 2.28742800  |
| C | 2.02820100  | -1.26379400 | 0.82800900  |
| C | 3.18127500  | -0.55442200 | 0.19529900  |
| C | 3.68352500  | -1.01140100 | -1.04539300 |
| C | 4.72121100  | -0.30992300 | -1.65854300 |
| H | 5.09952700  | -0.66733600 | -2.62115600 |
| C | 5.29463700  | 0.82493300  | -1.07799800 |
| C | 4.82727000  | 1.22305500  | 0.17295400  |
| H | 5.28764500  | 2.08602200  | 0.66501300  |
| C | 3.79418200  | 0.54342300  | 0.82878800  |
| C | 3.41732200  | 0.97163300  | 2.22174400  |
| H | 2.41741100  | 0.62448700  | 2.51188500  |
| H | 3.46331600  | 2.06621100  | 2.33013600  |
| H | 4.12098700  | 0.54730300  | 2.95745900  |
| C | 6.37828700  | 1.58542200  | -1.78625400 |
| H | 7.12799500  | 0.90676900  | -2.22112900 |
| H | 6.89738900  | 2.27726900  | -1.10745100 |
| H | 5.96403000  | 2.18158600  | -2.61633100 |
| C | 3.13356700  | -2.24905100 | -1.69126000 |
| H | 3.80745600  | -2.61324800 | -2.47932400 |
| H | 2.15313900  | -2.04346600 | -2.15905300 |
| H | 2.97798500  | -3.05151900 | -0.95555500 |
| C | -1.72610200 | -1.68805400 | 0.45524400  |
| C | -2.16037600 | -2.50351500 | -0.61145600 |
| C | -3.49604900 | -2.43766400 | -1.01846500 |
| H | -3.82840200 | -3.08093900 | -1.83897300 |
| C | -4.41745600 | -1.58970400 | -0.39856300 |
| C | -3.96609900 | -0.78736000 | 0.65173000  |
| H | -4.67090900 | -0.11780500 | 1.15551300  |
| C | -2.63876400 | -0.82538400 | 1.09102000  |
| C | -2.21103000 | 0.01777000  | 2.25764500  |
| H | -2.23095500 | -0.56520100 | 3.19326700  |

|    |             |             |             |
|----|-------------|-------------|-------------|
| H  | -2.87592200 | 0.88445100  | 2.38607500  |
| H  | -1.18009700 | 0.37318600  | 2.13236300  |
| C  | -5.84079600 | -1.52106700 | -0.87354000 |
| H  | -5.93083100 | -0.89854700 | -1.78056900 |
| H  | -6.50139700 | -1.08638800 | -0.10955400 |
| H  | -6.22735200 | -2.51824300 | -1.13171700 |
| C  | -1.21625100 | -3.47121700 | -1.26726600 |
| H  | -1.72744600 | -4.06100900 | -2.04056700 |
| H  | -0.78325300 | -4.16151200 | -0.52716600 |
| H  | -0.37006000 | -2.94825300 | -1.74119900 |
| Al | 0.34087500  | -0.06790000 | -1.45297600 |
| C  | -0.90485400 | 1.43516700  | -0.60707000 |
| N  | -0.63868200 | 2.37714100  | 0.32603300  |
| C  | -1.66425800 | 3.30355800  | 0.42704000  |
| C  | -2.61076200 | 2.92003200  | -0.48373500 |
| N  | -2.10802000 | 1.79124400  | -1.11003100 |
| C  | -2.78213300 | 1.05260900  | -2.15169000 |
| H  | -2.02177800 | 0.47558700  | -2.70461700 |
| H  | -3.28133000 | 1.74407300  | -2.84360400 |
| H  | -3.51232000 | 0.35215600  | -1.72471600 |
| C  | -3.93958900 | 3.49511400  | -0.80710900 |
| H  | -3.99121500 | 3.86102100  | -1.84531900 |
| H  | -4.16088900 | 4.34222000  | -0.14519900 |
| H  | -4.74003800 | 2.74884600  | -0.67837800 |
| C  | -1.63424300 | 4.43519100  | 1.38620900  |
| H  | -2.53346800 | 5.05483100  | 1.27584200  |
| H  | -0.75917400 | 5.08466400  | 1.22391500  |
| H  | -1.59659000 | 4.08500200  | 2.43083600  |
| C  | 0.57943800  | 2.39853100  | 1.09518100  |
| H  | 1.27073400  | 3.17482300  | 0.73296700  |
| H  | 1.05713000  | 1.41701200  | 0.99243200  |
| H  | 0.36439000  | 2.57496100  | 2.15810900  |

## 6) C-H activation intermediate **9**

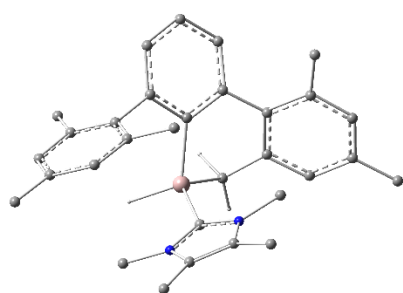

Selected hydrogen atoms are omitted for clarity.

Number of imaginary frequencies = 0

$E_{\text{total}} = -1553.003677$  a.u

$G_{\text{correction}} = 0.532657$  a.u

Cartesian coordinates:

|   |            |             |             |
|---|------------|-------------|-------------|
| C | 0.43557500 | -1.45667400 | 0.12611300  |
| C | 1.75550900 | -1.88944800 | -0.16059000 |
| C | 1.95364600 | -3.11142300 | -0.82175300 |

|    |             |             |             |
|----|-------------|-------------|-------------|
| H  | 2.96886700  | -3.48454400 | -0.97234600 |
| C  | 0.87449500  | -3.85376800 | -1.29316800 |
| H  | 1.04791300  | -4.80449300 | -1.80407100 |
| C  | -0.42143500 | -3.36804200 | -1.13932100 |
| H  | -1.27164300 | -3.91596900 | -1.55616700 |
| C  | -0.63812600 | -2.18288600 | -0.42529600 |
| C  | -2.02844500 | -1.65142000 | -0.29124900 |
| C  | -2.45937000 | -0.63383500 | -1.16389800 |
| C  | -3.76476000 | -0.14268100 | -1.05294700 |
| H  | -4.09567000 | 0.63868600  | -1.74518600 |
| C  | -4.65702400 | -0.63362100 | -0.09792500 |
| C  | -4.20662200 | -1.63737100 | 0.76396200  |
| H  | -4.88532700 | -2.03306900 | 1.52602500  |
| C  | -2.91261100 | -2.15762200 | 0.68204600  |
| C  | 2.92283000  | -1.00352000 | 0.13724400  |
| C  | 3.04235800  | -0.32964500 | 1.38578800  |
| C  | 4.11261700  | 0.55481100  | 1.58027300  |
| C  | 5.05355200  | 0.82769400  | 0.58855100  |
| C  | 4.89271000  | 0.19866100  | -0.64498400 |
| H  | 5.59188100  | 0.42498100  | -1.45602600 |
| C  | 3.85038700  | -0.70382200 | -0.88940000 |
| C  | 2.00625900  | -0.44979600 | 2.44461900  |
| H  | -0.98788200 | -0.55413700 | 2.68201000  |
| Al | 0.19331800  | -0.18618100 | 1.64839000  |
| C  | -0.39605500 | 1.60982100  | 0.80132900  |
| N  | 0.21089300  | 2.28767700  | -0.19739200 |
| C  | -0.64209900 | 3.21285400  | -0.77298900 |
| C  | -1.82438400 | 3.11661900  | -0.09076800 |
| N  | -1.63716000 | 2.13835100  | 0.86888400  |
| H  | 2.28319300  | 0.11784400  | 3.34434800  |
| H  | 1.87090700  | -1.50619100 | 2.74678600  |
| H  | 4.19689500  | 1.05462400  | 2.55024000  |
| C  | -2.46229800 | -3.22949300 | 1.62941400  |
| H  | -2.10423800 | -4.11906500 | 1.09018200  |
| H  | -1.62075000 | -2.86825300 | 2.24113500  |
| H  | -3.27476700 | -3.53318700 | 2.30406200  |
| C  | -1.54160200 | -0.09698800 | -2.22465800 |
| H  | -2.00720700 | 0.73632100  | -2.77004300 |
| H  | -0.59312500 | 0.24716000  | -1.78857700 |
| H  | -1.27515300 | -0.88233000 | -2.94959800 |
| C  | 3.73453500  | -1.24687500 | -2.29072700 |
| H  | 4.19796300  | -2.24046500 | -2.39600600 |
| H  | 2.68735200  | -1.35445500 | -2.60698700 |
| H  | 4.24741600  | -0.57757600 | -2.99698200 |
| C  | -2.66773900 | 1.73272300  | 1.80058800  |
| H  | -3.54044800 | 1.35594600  | 1.25062600  |
| H  | -2.27210300 | 0.91792700  | 2.41911000  |
| H  | -2.95994300 | 2.58101000  | 2.43628000  |
| C  | 1.55434700  | 2.03322300  | -0.66948200 |
| H  | 2.09922200  | 1.43439000  | 0.06784400  |
| H  | 1.53481000  | 1.47744000  | -1.61867200 |
| H  | 2.08865100  | 2.98096700  | -0.81490100 |
| C  | 6.20635900  | 1.75397700  | 0.84659500  |
| H  | 7.05067900  | 1.21298500  | 1.30635700  |
| H  | 6.57847400  | 2.20683500  | -0.08430800 |
| H  | 5.92815300  | 2.56410900  | 1.53725900  |
| C  | -6.06396600 | -0.11466500 | -0.00537200 |

|   |             |             |             |
|---|-------------|-------------|-------------|
| H | -6.78723500 | -0.85677100 | -0.38177800 |
| H | -6.34658700 | 0.10661100  | 1.03580100  |
| H | -6.19697800 | 0.80254000  | -0.59775800 |
| C | -3.11144400 | 3.83391500  | -0.25981400 |
| H | -3.39443100 | 4.39018900  | 0.64792300  |
| H | -3.04374700 | 4.55321600  | -1.08584600 |
| H | -3.93018500 | 3.13259300  | -0.48725300 |
| C | -0.24498400 | 4.07246500  | -1.91476100 |
| H | 0.59776300  | 4.73419600  | -1.65800400 |
| H | 0.05969400  | 3.47134000  | -2.78623200 |
| H | -1.08497400 | 4.70774000  | -2.22329000 |

### 7) C-H activation product **8**

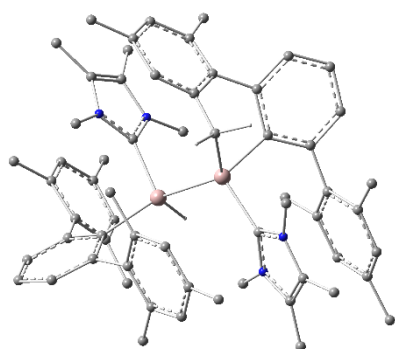

Hydrogen atoms are omitted for clarity.

Number of imaginary frequencies = 0

$E_{\text{total}} = -3106.044656$  a.u

$G_{\text{correction}} = 1.105305$  a.u

Cartesian coordinates:

|    |             |             |             |
|----|-------------|-------------|-------------|
| C  | 1.10147400  | -2.56459600 | -0.04982500 |
| C  | 0.26408100  | -3.47923500 | -0.75183000 |
| C  | 0.37370600  | -4.86132500 | -0.53510800 |
| H  | -0.21668500 | -5.54703800 | -1.14611300 |
| C  | 1.23637800  | -5.37467800 | 0.42607900  |
| H  | 1.30619200  | -6.45348500 | 0.58780900  |
| C  | 2.01608100  | -4.49692200 | 1.16711200  |
| H  | 2.70106300  | -4.87872700 | 1.93027500  |
| C  | 1.96751300  | -3.11519900 | 0.92138500  |
| C  | -0.73193600 | -3.02941300 | -1.77337800 |
| C  | -0.35427100 | -2.09164800 | -2.77777800 |
| C  | -1.25921400 | -1.80308400 | -3.80675600 |
| H  | -0.94108000 | -1.11425800 | -4.59561900 |
| C  | -2.53191400 | -2.37625900 | -3.87122800 |
| C  | -2.90881500 | -3.23226900 | -2.84060800 |
| H  | -3.91066800 | -3.67309700 | -2.84734000 |
| C  | -2.03798800 | -3.56269500 | -1.79310600 |
| C  | 0.95981300  | -1.40069100 | -2.71646800 |
| Al | 1.04585100  | -0.67184100 | -0.81372200 |
| H  | 1.08532200  | -0.71986400 | -3.57116600 |
| H  | 1.76622200  | -2.15259800 | -2.74730300 |
| H  | -0.53436100 | 0.60771100  | 1.90056200  |
| C  | 2.93092500  | -2.30461500 | 1.72995100  |

|    |             |             |             |
|----|-------------|-------------|-------------|
| C  | 4.28935600  | -2.26788600 | 1.36117700  |
| C  | 2.52291400  | -1.69076000 | 2.92995200  |
| C  | 5.20686900  | -1.59279800 | 2.17169900  |
| C  | 3.47593600  | -1.05603300 | 3.73215900  |
| C  | 4.82419500  | -0.99174200 | 3.37166100  |
| H  | 6.25791300  | -1.55925400 | 1.86687200  |
| H  | 3.15073300  | -0.59962200 | 4.67291800  |
| C  | 5.14709100  | 0.65033900  | -0.68474500 |
| C  | 4.66480700  | 1.27422800  | 0.43086900  |
| C  | 2.94714000  | 0.13671600  | -0.49901500 |
| N  | 4.07136400  | -0.02777600 | -1.23637400 |
| N  | 3.32789800  | 0.93998800  | 0.51573000  |
| Al | -0.85431000 | 0.72788800  | 0.30361300  |
| C  | -1.48108700 | 2.64568900  | -0.06102000 |
| C  | -2.60625600 | -0.35774900 | 0.15663900  |
| C  | -2.66002800 | 3.15654600  | 0.55014800  |
| C  | -0.82119700 | 3.51022300  | -0.96595100 |
| N  | -3.51322200 | -0.33332100 | -0.84330400 |
| N  | -3.09477800 | -1.25629900 | 1.03784100  |
| C  | -3.17467600 | 4.41402300  | 0.21088000  |
| C  | -3.36868800 | 2.38934400  | 1.62037800  |
| C  | -1.36074600 | 4.75810800  | -1.31583900 |
| C  | 0.54222100  | 3.22250700  | -1.51163500 |
| C  | -4.56523400 | -1.19924200 | -0.59856900 |
| C  | -4.30211600 | -1.78095100 | 0.61023300  |
| H  | -4.07878700 | 4.77340200  | 0.71064000  |
| C  | -2.54484700 | 5.20620400  | -0.74377600 |
| C  | -2.77278700 | 2.26945600  | 2.89638500  |
| C  | -4.64053900 | 1.83036600  | 1.39909800  |
| H  | -0.82428300 | 5.38689900  | -2.03276000 |
| C  | 1.64545000  | 3.80998000  | -0.86066400 |
| C  | 0.74205400  | 2.50141800  | -2.70299400 |
| H  | -2.96033000 | 6.17909900  | -1.01884200 |
| C  | -3.40115800 | 1.49397300  | 3.87081600  |
| C  | -5.23109100 | 1.04934500  | 2.39941000  |
| C  | 2.92413100  | 3.65633500  | -1.40306300 |
| C  | 2.03542000  | 2.37589700  | -3.21722000 |
| H  | -2.92629900 | 1.39846500  | 4.85244300  |
| C  | -4.61874900 | 0.84829700  | 3.63435600  |
| H  | -6.20684900 | 0.59315000  | 2.20413100  |
| H  | 3.77509300  | 4.12248900  | -0.89618600 |
| C  | 3.13988000  | 2.95599600  | -2.59038800 |
| H  | 2.17507400  | 1.83030500  | -4.15609000 |
| C  | 4.12760900  | -0.75842000 | -2.48114400 |
| H  | 3.53069700  | -0.24941100 | -3.24931700 |
| H  | 5.16829500  | -0.82722800 | -2.81589300 |
| H  | 3.73370000  | -1.77121100 | -2.34955300 |
| C  | -0.41332400 | 1.87338000  | -3.41778200 |
| H  | -0.14899400 | 1.60524300  | -4.45029400 |
| H  | -0.71413000 | 0.94882900  | -2.89924400 |
| H  | -1.28630500 | 2.54197300  | -3.43754700 |
| C  | 1.44880600  | 4.63879800  | 0.37854900  |
| H  | 2.40985200  | 4.86276700  | 0.86477700  |
| H  | 0.96288500  | 5.59828200  | 0.13971900  |
| H  | 0.78771500  | 4.13901300  | 1.10199900  |
| C  | -3.36193300 | 0.45470200  | -2.04333400 |
| H  | -2.82879700 | 1.38052300  | -1.79646700 |



|   |             |             |             |
|---|-------------|-------------|-------------|
| H | -2.79100300 | -0.10920800 | -2.79293900 |
| H | -4.34784100 | 0.71230800  | -2.44789700 |
| C | -2.43208700 | -1.64277500 | 2.26028800  |
| H | -1.89731900 | -2.59576500 | 2.12795300  |
| H | -1.71048100 | -0.85635800 | 2.51499700  |
| H | -3.16529700 | -1.73627400 | 3.07090100  |
| C | -2.57779000 | -4.46700000 | -0.71587000 |
| H | -2.41203600 | -5.53298100 | -0.93972400 |
| H | -2.10980700 | -4.27085800 | 0.25840300  |
| H | -3.66365900 | -4.32400300 | -0.62107900 |
| C | 4.77155100  | -2.99222500 | 0.13752300  |
| H | 5.00076200  | -4.04493500 | 0.37200200  |
| H | 4.00321200  | -3.01392200 | -0.64581900 |
| H | 5.68903200  | -2.53574100 | -0.26307800 |
| C | 1.08340500  | -1.71471400 | 3.34594800  |
| H | 0.96433800  | -1.39247700 | 4.39038600  |
| H | 0.48840000  | -1.03548100 | 2.71299700  |
| H | 0.65247200  | -2.72021900 | 3.23180900  |
| C | 2.47595800  | 1.41410000  | 1.58018900  |
| H | 2.36860300  | 2.50409000  | 1.52054200  |
| H | 1.48324400  | 0.95701900  | 1.48877500  |
| H | 2.90015900  | 1.12950300  | 2.55045500  |
| C | -1.50612600 | 3.00375500  | 3.22796700  |
| H | -1.31014900 | 2.97596300  | 4.30922100  |
| H | -0.64930700 | 2.54444000  | 2.71200800  |
| H | -1.56284500 | 4.05482900  | 2.90698800  |
| C | -5.41366500 | 2.09385900  | 0.13847900  |
| H | -6.08449400 | 1.25507000  | -0.09605500 |
| H | -6.04544700 | 2.99039300  | 0.25573100  |
| H | -4.75951400 | 2.28462900  | -0.71983400 |
| C | 4.50417200  | 2.89136000  | -3.21290400 |
| H | 4.60357200  | 3.63708300  | -4.01945300 |
| H | 5.29220500  | 3.09766100  | -2.47497000 |
| H | 4.70226500  | 1.90731600  | -3.66408000 |
| C | -5.25127700 | -0.01038100 | 4.69218500  |
| H | -5.37309200 | 0.54021100  | 5.63839100  |
| H | -6.24371700 | -0.36803300 | 4.38166300  |
| H | -4.63148200 | -0.89412300 | 4.91924300  |
| C | -3.47067600 | -2.04089900 | -4.99455900 |
| H | -2.98116300 | -2.15308600 | -5.97447600 |
| H | -4.35951400 | -2.68854000 | -4.98561100 |
| H | -3.81855400 | -0.99515400 | -4.93221500 |
| C | 5.83547500  | -0.34450000 | 4.27549300  |
| H | 6.16580900  | -1.04290000 | 5.06285300  |
| H | 6.73356900  | -0.03241100 | 3.72216500  |
| H | 5.42172500  | 0.53875000  | 4.78595500  |
| C | -5.08506100 | -2.74915300 | 1.41503400  |
| H | -5.43434400 | -2.29699500 | 2.35805100  |
| H | -5.97013900 | -3.08150500 | 0.85705300  |
| H | -4.49373700 | -3.64218200 | 1.67065000  |
| C | -5.70062300 | -1.38182800 | -1.53486700 |
| H | -6.37131300 | -2.16925200 | -1.16712300 |
| H | -6.29780400 | -0.46221800 | -1.64836300 |
| H | -5.34928100 | -1.67943900 | -2.53464000 |
| C | 5.33118000  | 2.14460100  | 1.42732300  |
| H | 6.39074800  | 2.27895600  | 1.17474300  |
| H | 4.86431800  | 3.14177000  | 1.46727000  |

|   |            |             |             |
|---|------------|-------------|-------------|
| H | 5.27601200 | 1.70950200  | 2.43685700  |
| C | 6.52687900 | 0.60080300  | -1.22883400 |
| H | 7.19060600 | 1.22248000  | -0.61409600 |
| H | 6.93298400 | -0.42405300 | -1.21717100 |
| H | 6.58781400 | 0.97504000  | -2.26233700 |

### 8) Pentalene product 4

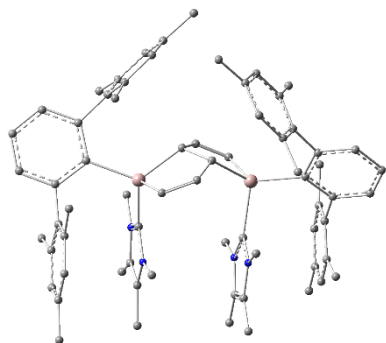

Hydrogen atoms are omitted for clarity.

Number of imaginary frequencies = 0

$E_{\text{total}} = -3337.851511$  a.u

$G_{\text{correction}} = 1.195506$  a.u

Cartesian coordinates:

|    |             |             |             |
|----|-------------|-------------|-------------|
| Al | 2.06773300  | 0.49942100  | -0.18904700 |
| C  | 1.37286300  | 0.71864500  | -2.02148600 |
| H  | 1.74012400  | 0.54071600  | -3.04133600 |
| C  | 0.11745400  | 1.22699000  | -1.89168800 |
| H  | -0.49289600 | 1.46876000  | -2.77885800 |
| C  | -0.50456300 | 1.52995600  | -0.58653800 |
| H  | -0.96567700 | 2.53045600  | -0.66332100 |
| N  | 1.70712400  | -2.59098900 | -0.44314900 |
| C  | 1.88956000  | -1.51145700 | 0.34370100  |
| N  | 2.02668400  | -2.01806700 | 1.58769300  |
| C  | 1.96266900  | -3.40252900 | 1.58690100  |
| C  | 1.77030100  | -3.76765300 | 0.28176200  |
| C  | 1.48709700  | -2.54666700 | -1.87080400 |
| H  | 2.35024600  | -2.96601100 | -2.40190000 |
| H  | 1.35255400  | -1.49409800 | -2.15784200 |
| H  | 0.57883800  | -3.11356700 | -2.11570800 |
| C  | 2.16627100  | -1.20265700 | 2.77112200  |
| H  | 2.93250000  | -1.62138700 | 3.43697400  |
| H  | 1.20835500  | -1.12251300 | 3.30516100  |
| H  | 2.47413100  | -0.19639900 | 2.46507500  |
| C  | 3.99209300  | 0.96543500  | 0.33454100  |
| C  | 4.31937400  | 2.16895800  | 1.01140300  |
| C  | 5.63889000  | 2.48151300  | 1.36679000  |
| H  | 5.83752600  | 3.42549300  | 1.88228100  |
| C  | 6.68417100  | 1.62029800  | 1.05808800  |
| H  | 7.71197300  | 1.87078000  | 1.33308000  |
| C  | 6.40198300  | 0.44397300  | 0.37483700  |
| H  | 7.21187600  | -0.23686700 | 0.09620200  |

|    |             |             |             |
|----|-------------|-------------|-------------|
| C  | 5.08579000  | 0.12060100  | 0.01552400  |
| C  | 3.29011200  | 3.19230300  | 1.36061700  |
| C  | 2.82544200  | 3.30337300  | 2.68446800  |
| C  | 1.85682700  | 4.26072000  | 2.99041000  |
| H  | 1.47936500  | 4.32312700  | 4.01591100  |
| C  | 1.35443100  | 5.13371100  | 2.02390200  |
| C  | 1.85748000  | 5.03365200  | 0.72637300  |
| H  | 1.48195200  | 5.71048100  | -0.04537500 |
| C  | 2.81043500  | 4.07383200  | 0.37350100  |
| C  | 3.36197700  | 2.41459100  | 3.77142900  |
| H  | 2.66744000  | 2.36599800  | 4.62265900  |
| H  | 4.32857400  | 2.78637300  | 4.15007400  |
| H  | 3.55074000  | 1.39493300  | 3.40838200  |
| C  | 3.25591200  | 3.95461900  | -1.05490600 |
| H  | 4.32777200  | 3.72284900  | -1.13243600 |
| H  | 3.05427800  | 4.88278200  | -1.60869800 |
| H  | 2.70986700  | 3.13829000  | -1.56157600 |
| C  | 4.93665800  | -1.13874100 | -0.77458000 |
| C  | 4.82253700  | -1.06607800 | -2.17988800 |
| C  | 4.79564400  | -2.24915500 | -2.92124300 |
| H  | 4.71803500  | -2.18441900 | -4.01122200 |
| C  | 4.87576600  | -3.50671900 | -2.31418200 |
| C  | 5.00505300  | -3.55497200 | -0.92606600 |
| H  | 5.09406400  | -4.52655200 | -0.42910800 |
| C  | 5.05547200  | -2.39231400 | -0.14915800 |
| C  | 4.80586100  | 0.26464600  | -2.87315800 |
| H  | 5.73016600  | 0.82363700  | -2.65801900 |
| H  | 3.97202500  | 0.88985800  | -2.52342500 |
| H  | 4.71715700  | 0.14361800  | -3.96178300 |
| C  | 5.29294100  | -2.49695800 | 1.33017200  |
| H  | 6.36305800  | -2.37371500 | 1.56485100  |
| H  | 4.98122200  | -3.47949200 | 1.71343500  |
| H  | 4.76563000  | -1.70734500 | 1.88089200  |
| C  | -1.37260000 | 0.71690700  | 2.02200800  |
| H  | -1.73977400 | 0.53818800  | 3.04174900  |
| C  | -0.11734200 | 1.22572000  | 1.89250200  |
| H  | 0.49298300  | 1.46708200  | 2.77981000  |
| C  | 0.50455000  | 1.52967400  | 0.58754500  |
| H  | 0.96552500  | 2.53018900  | 0.66492300  |
| Al | -2.06754000 | 0.49892200  | 0.18945200  |
| N  | -1.70670500 | -2.59156700 | 0.44083800  |
| C  | -1.88914700 | -1.51139500 | -0.34510300 |
| N  | -2.02634800 | -2.01697100 | -1.58950800 |
| C  | -1.96249200 | -3.40144900 | -1.58983400 |
| C  | -1.77004200 | -3.76765500 | -0.28501400 |
| C  | -1.48697300 | -2.54836600 | 1.86857100  |
| H  | -2.35054100 | -2.96749300 | 2.39915900  |
| H  | -1.35188800 | -1.49606900 | 2.15635800  |
| H  | -0.57915400 | -3.11602900 | 2.11331200  |
| C  | -2.16627300 | -1.20071800 | -2.77229800 |
| H  | -2.93502700 | -1.61707800 | -3.43675900 |
| H  | -1.20929700 | -1.12296000 | -3.30836700 |
| H  | -2.47072000 | -0.19376400 | -2.46520100 |
| C  | -3.99211600 | 0.96463000  | -0.33358700 |
| C  | -4.31982500 | 2.16777400  | -1.01090700 |
| C  | -5.63947200 | 2.47986600  | -1.36619100 |
| H  | -5.83841200 | 3.42352100  | -1.88215600 |

|   |             |             |             |
|---|-------------|-------------|-------------|
| C | -6.68449400 | 1.61856200  | -1.05685800 |
| H | -7.71240900 | 1.86867500  | -1.33176600 |
| C | -6.40189500 | 0.44262500  | -0.37311200 |
| H | -7.21157700 | -0.23826300 | -0.09398200 |
| C | -5.08554600 | 0.11968200  | -0.01396600 |
| C | -3.29082800 | 3.19115200  | -1.36081300 |
| C | -2.82647000 | 3.30186100  | -2.68478000 |
| C | -1.85814500 | 4.25936600  | -2.99127000 |
| H | -1.48089100 | 4.32148200  | -4.01686800 |
| C | -1.35578800 | 5.13283600  | -2.02521300 |
| C | -1.85854900 | 5.03312500  | -0.72752300 |
| H | -1.48301100 | 5.71031800  | 0.04389900  |
| C | -2.81113300 | 4.07317400  | -0.37410400 |
| C | -3.36308500 | 2.41282300  | -3.77151800 |
| H | -2.66621000 | 2.35992400  | -4.62059900 |
| H | -4.32702700 | 2.78768500  | -4.15393900 |
| H | -3.55690200 | 1.39466900  | -3.40698500 |
| C | -3.25621400 | 3.95429700  | 1.05445700  |
| H | -4.32801400 | 3.72236900  | 1.13234600  |
| H | -3.05458000 | 4.88264800  | 1.60793100  |
| H | -2.70992100 | 3.13820200  | 1.56123800  |
| C | -4.93599400 | -1.13932100 | 0.77661300  |
| C | -4.82172700 | -1.06608900 | 2.18187100  |
| C | -4.79468800 | -2.24887000 | 2.92372000  |
| H | -4.71697100 | -2.18368700 | 4.01366000  |
| C | -4.87481900 | -3.50667600 | 2.31718400  |
| C | -5.00421300 | -3.55550100 | 0.92908200  |
| H | -5.09330100 | -4.52728200 | 0.43252900  |
| C | -5.05472700 | -2.39317200 | 0.15170200  |
| C | -4.80507100 | 0.26492100  | 2.87458600  |
| H | -5.72940500 | 0.82379100  | 2.65925800  |
| H | -3.97126000 | 0.88999300  | 2.52453300  |
| H | -4.71629500 | 0.14435500  | 3.96325500  |
| C | -5.29228700 | -2.49842900 | -1.32757200 |
| H | -6.36237700 | -2.37497100 | -1.56225800 |
| H | -4.98082400 | -3.48120900 | -1.71041200 |
| H | -4.76476900 | -1.70920600 | -1.87865400 |
| C | 0.27966000  | 6.12226600  | 2.37064200  |
| H | 0.20840000  | 6.92231900  | 1.61976400  |
| H | -0.70310500 | 5.62479300  | 2.42144300  |
| H | 0.45839000  | 6.58887800  | 3.35121500  |
| C | 4.80810400  | -4.76217200 | -3.13656100 |
| H | 3.78821300  | -4.93826800 | -3.52060400 |
| H | 5.47086000  | -4.70576500 | -4.01364200 |
| H | 5.09808700  | -5.64572500 | -2.54968700 |
| C | -0.28128300 | 6.12149500  | -2.37248500 |
| H | -0.21033000 | 6.92204500  | -1.62210700 |
| H | 0.70163000  | 5.62427000  | -2.42285500 |
| H | -0.46004900 | 6.58742700  | -3.35337300 |
| C | -4.80666300 | -4.76183900 | 3.13995500  |
| H | -3.78585600 | -4.93935200 | 3.52093500  |
| H | -5.46664000 | -4.70398900 | 4.01901800  |
| H | -5.09972900 | -5.64522700 | 2.55436200  |
| C | -2.10843100 | -4.21609800 | -2.82108900 |
| H | -1.98900300 | -5.28250200 | -2.58914900 |
| H | -3.10077900 | -4.08484800 | -3.28253100 |
| H | -1.35618000 | -3.95102800 | -3.58172500 |

|   |             |             |             |
|---|-------------|-------------|-------------|
| C | -1.71420000 | -5.10011000 | 0.36283400  |
| H | -2.58099900 | -5.24399300 | 1.02774000  |
| H | -1.72899500 | -5.89953300 | -0.38936300 |
| H | -0.80591600 | -5.22078200 | 0.97219800  |
| C | 2.10826500  | -4.21830800 | 2.81745700  |
| H | 1.35596300  | -3.95375800 | 3.57822000  |
| H | 1.98861200  | -5.28446900 | 2.58451800  |
| H | 3.10057700  | -4.08775500 | 3.27917900  |
| C | 1.71440700  | -5.09959400 | -0.36712200 |
| H | 2.58133300  | -5.24312100 | -1.03193400 |
| H | 1.72890800  | -5.89959700 | 0.38446500  |
| H | 0.80623900  | -5.21966200 | -0.97678200 |

## 2.4. Optimized structures, frontier orbitals and dissociation of dialumenes **6** and **II**

### 9) Dialumene **6**

Note: Structural details and energies of **6** are already given in Section 2.3.

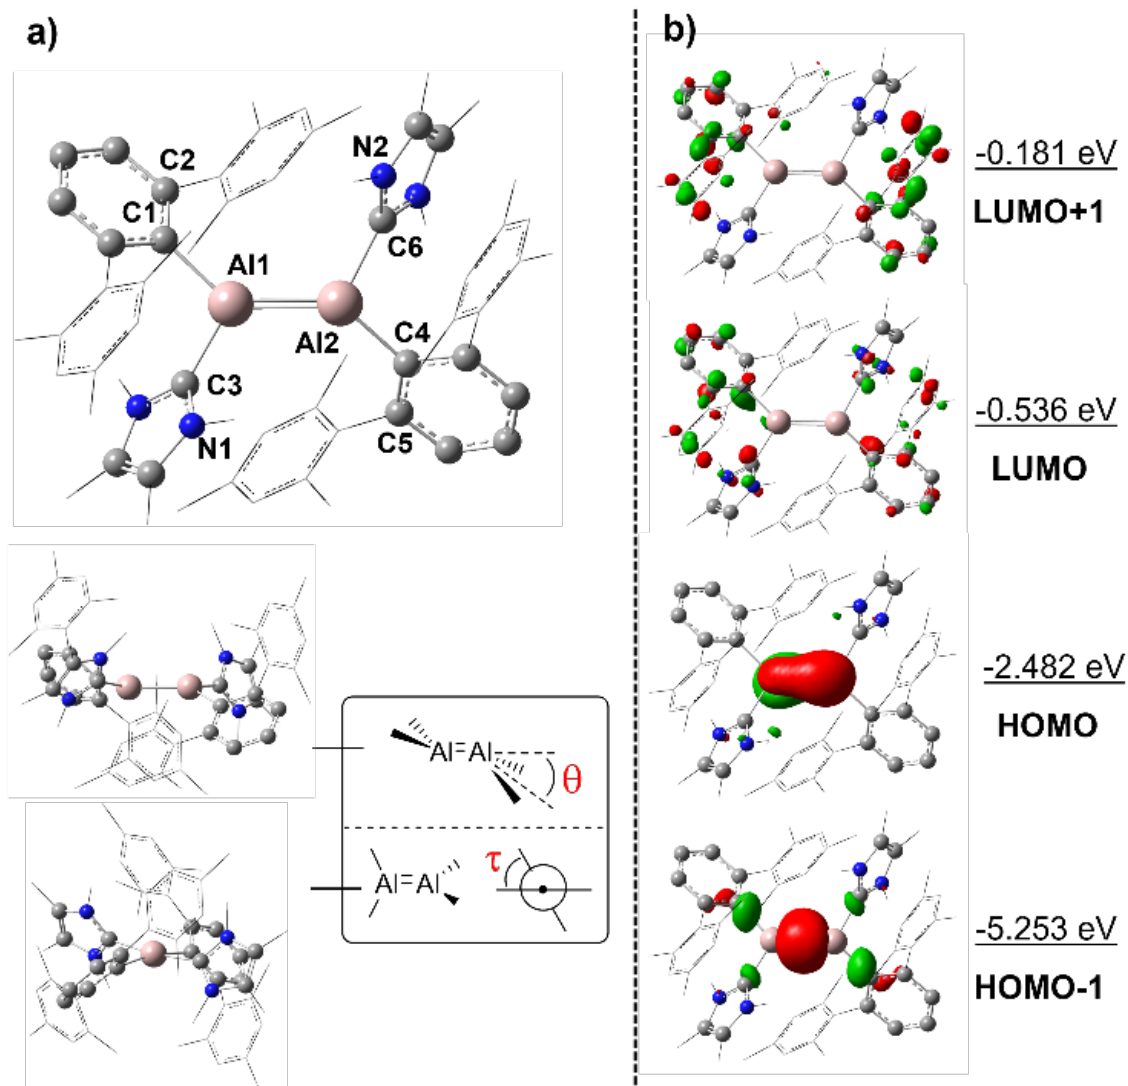

**Figure S32.** Computed structure (a) and frontier orbitals ( $\pm 0.05$  isovalue) (b) of dialumene **6**. Hydrogens are omitted for clarity. Mesityls of the terphenyl substituent and the methyls of NHC are depicted in wireframe for simplicity. Selected bond lengths [ $\text{\AA}$ ] and bond angles [ $^\circ$ ]: Al1-Al2 2.373, Al1-C1 2.007, Al1-C3 2.034, Al2-C4 2.005, Al2-C6 2.035; C1-Al1-C3 C4-Al2-C6 105.7, C2-C1-Al1-Al2 44.3, N1-C3-Al1-Al2 53.6, C5-C4-Al2-Al1 32.4, N2-C6-Al2-Al1 63.0,  $\theta$  9.6, 11.8,  $\tau$  7.7.

### 10) Dialumene **II**

Number of imaginary frequencies = 0

$E_{\text{total}} = -2732.785665 \text{ a.u}$

$G_{\text{correction}} = 1.174695 \text{ a.u}$

$\text{BSSE}_{\text{correction}} = 0.002256363 \text{ a.u}$

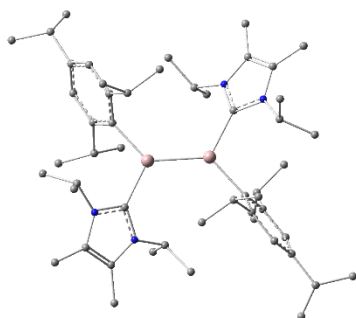

Cartesian coordinates:

|    |             |             |             |
|----|-------------|-------------|-------------|
| Al | -0.92512300 | -0.67493200 | 0.11637600  |
| Al | 0.97024400  | 0.75993000  | 0.17063100  |
| N  | 0.23499700  | -3.45139100 | -0.46746000 |
| N  | -1.46873900 | -3.57438800 | 0.85638500  |
| N  | -0.24984100 | 3.50886800  | -0.42180000 |
| N  | 1.47522200  | 3.66957900  | 0.87056700  |
| C  | -2.87609100 | -0.18227000 | 0.03258600  |
| C  | -3.55513500 | 0.39642600  | 1.13066200  |
| C  | -4.88067600 | 0.82862600  | 0.99708800  |
| C  | -5.58143400 | 0.69364800  | -0.19984000 |
| C  | -4.91744600 | 0.11167200  | -1.28298600 |
| C  | -3.58886600 | -0.31143700 | -1.18671700 |
| C  | -2.85707600 | 0.58760000  | 2.46745000  |
| C  | -2.34636400 | 2.01580600  | 2.63728800  |
| C  | -3.70519200 | 0.15330700  | 3.65970200  |
| C  | -7.00901100 | 1.18218400  | -0.32614400 |
| C  | -7.11547600 | 2.33846200  | -1.32061800 |
| C  | -7.97032100 | 0.04977700  | -0.68428200 |
| C  | -2.91774500 | -0.92186100 | -2.40664200 |
| C  | -3.26625600 | -0.22303900 | -3.71676500 |
| C  | -3.18451700 | -2.42316500 | -2.50056500 |
| C  | -0.69253800 | -2.69009000 | 0.17208100  |
| C  | 0.03578000  | -4.79667200 | -0.20240500 |
| C  | -1.04492100 | -4.87693400 | 0.63622600  |
| C  | 1.21744200  | -2.86373800 | -1.38780200 |
| C  | 2.65527400  | -3.22470900 | -1.05465700 |
| C  | 0.83443500  | -3.13527000 | -2.83457800 |
| C  | 0.89105100  | -5.90300500 | -0.70690800 |
| C  | -1.65270600 | -6.09227900 | 1.24017500  |
| C  | -2.51655500 | -3.11837400 | 1.77465600  |
| C  | -3.91927300 | -3.43378500 | 1.28190700  |
| C  | -2.24437400 | -3.55313400 | 3.20704000  |
| C  | 2.91842300  | 0.25796600  | 0.09855000  |
| C  | 3.53250000  | -0.45926900 | 1.15194700  |
| C  | 4.81463200  | -1.00040100 | 0.98901300  |
| C  | 5.53216400  | -0.84748200 | -0.19507100 |
| C  | 4.94631200  | -0.09975000 | -1.22110100 |
| C  | 3.67070000  | 0.45449600  | -1.08719400 |
| C  | 2.82578600  | -0.65315500 | 2.48317200  |
| C  | 3.68661900  | -0.23245100 | 3.67195900  |
| C  | 2.28992200  | -2.07175800 | 2.64978800  |

|   |             |             |             |
|---|-------------|-------------|-------------|
| C | 6.89960400  | -1.47526200 | -0.36414000 |
| C | 6.88411900  | -2.55487300 | -1.44662000 |
| C | 7.98087700  | -0.43044100 | -0.63569500 |
| C | 3.09062700  | 1.25174400  | -2.24613000 |
| C | 2.47042900  | 0.33345900  | -3.29698800 |
| C | 4.08300600  | 2.22561600  | -2.87545400 |
| C | 0.69951000  | 2.76749400  | 0.21085300  |
| C | -0.06087700 | 4.86002900  | -0.17850600 |
| C | 1.03265300  | 4.96408500  | 0.64064600  |
| C | -1.23231500 | 2.89741200  | -1.32743000 |
| C | -2.67056700 | 3.26993300  | -1.00791200 |
| C | -0.84221200 | 3.12621700  | -2.77987800 |
| C | -0.93378600 | 5.94996900  | -0.68857600 |
| C | 1.63609600  | 6.19334000  | 1.22027300  |
| C | 2.57331500  | 3.23792700  | 1.73927100  |
| C | 3.93784100  | 3.54237700  | 1.14397100  |
| C | 2.39590900  | 3.71126900  | 3.17414000  |
| H | -5.39124200 | 1.28909300  | 1.84920300  |
| H | -5.45003100 | -0.00210300 | -2.23173800 |
| H | -1.94995500 | -0.05033500 | 2.43948200  |
| H | -3.16974200 | 2.74646600  | 2.57240000  |
| H | -1.60190100 | 2.25094500  | 1.86124600  |
| H | -1.85282500 | 2.14210200  | 3.61492500  |
| H | -4.10914200 | -0.86164300 | 3.51960800  |
| H | -4.56228900 | 0.82564800  | 3.82611000  |
| H | -3.10496000 | 0.15837200  | 4.58334000  |
| H | -7.30272500 | 1.56782400  | 0.66568200  |
| H | -8.14367400 | 2.73225300  | -1.36416900 |
| H | -6.83875900 | 2.01315100  | -2.33635400 |
| H | -6.44223600 | 3.16326600  | -1.04177200 |
| H | -9.01147400 | 0.40896400  | -0.71361500 |
| H | -7.90931700 | -0.76881800 | 0.04857200  |
| H | -7.73648600 | -0.37250300 | -1.67465600 |
| H | -1.82628100 | -0.78998300 | -2.24784500 |
| H | -4.31116800 | -0.40041800 | -4.01873000 |
| H | -2.62639800 | -0.59432200 | -4.53273600 |
| H | -3.12238100 | 0.86560000  | -3.64091400 |
| H | -2.69169600 | -2.86001500 | -3.38475500 |
| H | -4.26509600 | -2.62684900 | -2.58151800 |
| H | -2.80590000 | -2.94865300 | -1.61167500 |
| H | 1.09990000  | -1.77793800 | -1.22028000 |
| H | 2.93201600  | -4.23642000 | -1.38602000 |
| H | 2.84547600  | -3.13419500 | 0.02262400  |
| H | 3.32551100  | -2.51012800 | -1.55419400 |
| H | -0.18116200 | -2.76421900 | -3.03650300 |
| H | 0.87221600  | -4.20567200 | -3.08741900 |
| H | 1.52965700  | -2.60832200 | -3.50343600 |
| H | 1.06174800  | -5.83983800 | -1.79063400 |
| H | 0.40970700  | -6.86808700 | -0.50236200 |
| H | 1.87683700  | -5.91371400 | -0.21670300 |
| H | -1.31848300 | -6.98512900 | 0.69570500  |
| H | -2.75003700 | -6.07047000 | 1.19466100  |
| H | -1.36567500 | -6.22520300 | 2.29539600  |
| H | -2.41253600 | -2.02415700 | 1.74512300  |
| H | -4.13690900 | -4.51239100 | 1.27356300  |
| H | -4.07216700 | -3.02973600 | 0.27206100  |
| H | -4.65220400 | -2.94855400 | 1.94323800  |



|   |             |             |             |
|---|-------------|-------------|-------------|
| H | -2.41639400 | -4.62663700 | 3.36880100  |
| H | -2.91580100 | -3.00591800 | 3.88434300  |
| H | -1.20883900 | -3.31242500 | 3.49052300  |
| H | 5.27418400  | -1.56486700 | 1.80748000  |
| H | 5.50182300  | 0.05020300  | -2.15182700 |
| H | 1.93396000  | 0.00565800  | 2.45882000  |
| H | 4.55239600  | -0.89934100 | 3.81400200  |
| H | 3.09941800  | -0.25563300 | 4.60387000  |
| H | 4.07851900  | 0.78860000  | 3.54037100  |
| H | 1.54369400  | -2.29209000 | 1.87099400  |
| H | 1.79254100  | -2.19113300 | 3.62651700  |
| H | 3.09794800  | -2.81953700 | 2.58591200  |
| H | 7.14454900  | -1.96739200 | 0.59321500  |
| H | 6.64638200  | -2.12285100 | -2.43204400 |
| H | 6.12576800  | -3.32237700 | -1.22933400 |
| H | 7.86429600  | -3.05182900 | -1.52708800 |
| H | 7.80083500  | 0.09099600  | -1.58934500 |
| H | 8.97659900  | -0.89823300 | -0.69574100 |
| H | 8.00554400  | 0.33020000  | 0.15905900  |
| H | 2.26345100  | 1.85236500  | -1.82306100 |
| H | 1.63562000  | -0.23421900 | -2.85625000 |
| H | 3.21682200  | -0.37502900 | -3.69283600 |
| H | 2.06822600  | 0.91334200  | -4.14419100 |
| H | 3.57448600  | 2.87356400  | -3.60696100 |
| H | 4.89025400  | 1.70350300  | -3.41364300 |
| H | 4.55418500  | 2.87088500  | -2.11803500 |
| H | -1.11716700 | 1.81619300  | -1.13454300 |
| H | -3.34132700 | 2.54290300  | -1.48862500 |
| H | -2.94515400 | 4.27266500  | -1.36637700 |
| H | -2.86247100 | 3.20925200  | 0.07138500  |
| H | -1.52908200 | 2.57360900  | -3.43700800 |
| H | 0.17494100  | 2.74915800  | -2.96415200 |
| H | -0.88272700 | 4.18818500  | -3.06656500 |
| H | -1.91307100 | 5.96071300  | -0.18550900 |
| H | -1.11821000 | 5.86633000  | -1.76881200 |
| H | -0.45822600 | 6.92262300  | -0.50746900 |
| H | 1.36812100  | 6.33280900  | 2.27973900  |
| H | 1.27953000  | 7.07634200  | 0.67387600  |
| H | 2.73277700  | 6.18546200  | 1.15368700  |
| H | 2.47119900  | 2.14208400  | 1.74627200  |
| H | 4.01413200  | 3.11615500  | 0.13427700  |
| H | 4.71885200  | 3.07165100  | 1.75914900  |
| H | 4.14977300  | 4.62122300  | 1.09499500  |
| H | 3.10564400  | 3.17413600  | 3.82008500  |
| H | 1.37933000  | 3.48730400  | 3.53027100  |
| H | 2.58662100  | 4.78645200  | 3.29888800  |

11) Alumylene 7 (singlet ground state)

Note: The ground state for alumylene 7 is singlet ( $\Delta G_{\text{singlet-triplet}} = 17.0$  kcal/mol).

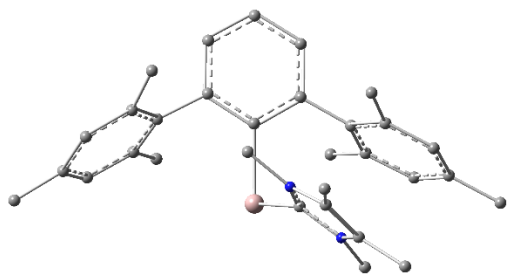

Hydrogen atoms are omitted for clarity.

Number of imaginary frequencies = 0

$E_{\text{total}} = -1552.947063$  a.u

$G_{\text{correction}} = 0.532312$  a.u

Cartesian coordinates:

|   |             |             |             |
|---|-------------|-------------|-------------|
| C | 0.72120600  | -1.07724100 | 0.31590700  |
| C | -0.31976700 | -1.79502100 | 0.94954500  |
| C | -0.07187100 | -2.63572500 | 2.04093300  |
| H | -0.90482700 | -3.17317500 | 2.50465100  |
| C | 1.22250800  | -2.79326800 | 2.52979000  |
| H | 1.41547500  | -3.45379800 | 3.37890000  |
| C | 2.26891500  | -2.10760700 | 1.91987900  |
| H | 3.29231600  | -2.22816300 | 2.28742800  |
| C | 2.02820100  | -1.26379400 | 0.82800900  |
| C | 3.18127500  | -0.55442200 | 0.19529900  |
| C | 3.68352500  | -1.01140100 | -1.04539300 |
| C | 4.72121100  | -0.30992300 | -1.65854300 |
| H | 5.09952700  | -0.66733600 | -2.62115600 |
| C | 5.29463700  | 0.82493300  | -1.07799800 |
| C | 4.82727000  | 1.22305500  | 0.17295400  |
| H | 5.28764500  | 2.08602200  | 0.66501300  |
| C | 3.79418200  | 0.54342300  | 0.82878800  |
| C | 3.41732200  | 0.97163300  | 2.22174400  |
| H | 2.41741100  | 0.62448700  | 2.51188500  |
| H | 3.46331600  | 2.06621100  | 2.33013600  |
| H | 4.12098700  | 0.54730300  | 2.95745900  |
| C | 6.37828700  | 1.58542200  | -1.78625400 |
| H | 7.12799500  | 0.90676900  | -2.22112900 |
| H | 6.89738900  | 2.27726900  | -1.10745100 |
| H | 5.96403000  | 2.18158600  | -2.61633100 |
| C | 3.13356700  | -2.24905100 | -1.69126000 |
| H | 3.80745600  | -2.61324800 | -2.47932400 |
| H | 2.15313900  | -2.04346600 | -2.15905300 |
| H | 2.97798500  | -3.05151900 | -0.95555500 |
| C | -1.72610200 | -1.68805400 | 0.45524400  |
| C | -2.16037600 | -2.50351500 | -0.61145600 |
| C | -3.49604900 | -2.43766400 | -1.01846500 |
| H | -3.82840200 | -3.08093900 | -1.83897300 |
| C | -4.41745600 | -1.58970400 | -0.39856300 |
| C | -3.96609900 | -0.78736000 | 0.65173000  |
| H | -4.67090900 | -0.11780500 | 1.15551300  |
| C | -2.63876400 | -0.82538400 | 1.09102000  |
| C | -2.21103000 | 0.01777000  | 2.25764500  |
| H | -2.23095500 | -0.56520100 | 3.19326700  |

|    |             |             |             |
|----|-------------|-------------|-------------|
| H  | -2.87592200 | 0.88445100  | 2.38607500  |
| H  | -1.18009700 | 0.37318600  | 2.13236300  |
| C  | -5.84079600 | -1.52106700 | -0.87354000 |
| H  | -5.93083100 | -0.89854700 | -1.78056900 |
| H  | -6.50139700 | -1.08638800 | -0.10955400 |
| H  | -6.22735200 | -2.51824300 | -1.13171700 |
| C  | -1.21625100 | -3.47121700 | -1.26726600 |
| H  | -1.72744600 | -4.06100900 | -2.04056700 |
| H  | -0.78325300 | -4.16151200 | -0.52716600 |
| H  | -0.37006000 | -2.94825300 | -1.74119900 |
| Al | 0.34087500  | -0.06790000 | -1.45297600 |
| C  | -0.90485400 | 1.43516700  | -0.60707000 |
| N  | -0.63868200 | 2.37714100  | 0.32603300  |
| C  | -1.66425800 | 3.30355800  | 0.42704000  |
| C  | -2.61076200 | 2.92003200  | -0.48373500 |
| N  | -2.10802000 | 1.79124400  | -1.11003100 |
| C  | -2.78213300 | 1.05260900  | -2.15169000 |
| H  | -2.02177800 | 0.47558700  | -2.70461700 |
| H  | -3.28133000 | 1.74407300  | -2.84360400 |
| H  | -3.51232000 | 0.35215600  | -1.72471600 |
| C  | -3.93958900 | 3.49511400  | -0.80710900 |
| H  | -3.99121500 | 3.86102100  | -1.84531900 |
| H  | -4.16088900 | 4.34222000  | -0.14519900 |
| H  | -4.74003800 | 2.74884600  | -0.67837800 |
| C  | -1.63424300 | 4.43519100  | 1.38620900  |
| H  | -2.53346800 | 5.05483100  | 1.27584200  |
| H  | -0.75917400 | 5.08466400  | 1.22391500  |
| H  | -1.59659000 | 4.08500200  | 2.43083600  |
| C  | 0.57943800  | 2.39853100  | 1.09518100  |
| H  | 1.27073400  | 3.17482300  | 0.73296700  |
| H  | 1.05713000  | 1.41701200  | 0.99243200  |
| H  | 0.36439000  | 2.57496100  | 2.15810900  |

## 12) Alumylene 7 (triplet ground state)

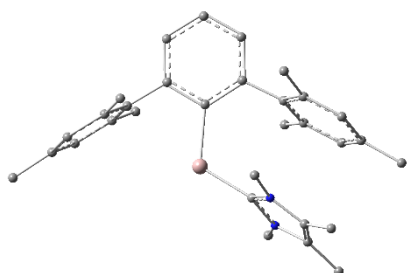

Hydrogen atoms are omitted for clarity.

Number of imaginary frequencies = 0

$E_{\text{total}} = -1552.923643$  a.u

$G_{\text{correction}} = 0.533081$  a.u

Cartesian coordinates:

|   |            |             |             |
|---|------------|-------------|-------------|
| C | 1.08748200 | -0.99907300 | -0.15172300 |
| C | 0.13926900 | -2.04539200 | -0.30253000 |
| C | 0.55306000 | -3.37727300 | -0.42280100 |

|    |             |             |             |
|----|-------------|-------------|-------------|
| H  | -0.20366300 | -4.15797900 | -0.54694200 |
| C  | 1.90309400  | -3.71623100 | -0.39621500 |
| H  | 2.21324800  | -4.75917800 | -0.49630300 |
| C  | 2.85318500  | -2.70701900 | -0.24387400 |
| H  | 3.91927400  | -2.95143500 | -0.21936700 |
| C  | 2.45770900  | -1.37356100 | -0.12650800 |
| C  | 3.49479400  | -0.31059700 | 0.01680500  |
| C  | 4.05747600  | 0.28138500  | -1.13086100 |
| C  | 5.01039700  | 1.29077900  | -0.97566400 |
| H  | 5.44243300  | 1.75075200  | -1.86986100 |
| C  | 5.42305600  | 1.72736700  | 0.28472400  |
| C  | 4.86392800  | 1.11585800  | 1.40900000  |
| H  | 5.18036400  | 1.43660500  | 2.40642500  |
| C  | 3.90754100  | 0.10478200  | 1.29789000  |
| C  | 3.32210900  | -0.53243500 | 2.52437700  |
| H  | 2.22827100  | -0.39604900 | 2.54492500  |
| H  | 3.74439600  | -0.09703400 | 3.44084600  |
| H  | 3.50204600  | -1.61848900 | 2.53727900  |
| C  | 6.41705400  | 2.84389500  | 0.42794500  |
| H  | 7.11016000  | 2.88005300  | -0.42540900 |
| H  | 7.01121900  | 2.74063000  | 1.34791900  |
| H  | 5.90734800  | 3.82106900  | 0.47650300  |
| C  | 3.63495000  | -0.16762800 | -2.49999100 |
| H  | 4.13273500  | 0.42131900  | -3.28302200 |
| H  | 2.54490500  | -0.06195900 | -2.62435300 |
| H  | 3.86790500  | -1.23130400 | -2.66317900 |
| C  | -1.32435800 | -1.76122600 | -0.32317500 |
| C  | -1.93100800 | -1.21320800 | -1.47343500 |
| C  | -3.29366000 | -0.91439300 | -1.44955400 |
| H  | -3.75576200 | -0.48600600 | -2.34542500 |
| C  | -4.08676000 | -1.16424100 | -0.32539100 |
| C  | -3.48024100 | -1.75712000 | 0.78159100  |
| H  | -4.08787400 | -1.99330900 | 1.66176000  |
| C  | -2.11415700 | -2.06511700 | 0.79998400  |
| C  | -1.50711400 | -2.71720700 | 2.01093400  |
| H  | -1.28287500 | -3.77883800 | 1.82203400  |
| H  | -2.18836300 | -2.67136500 | 2.87355200  |
| H  | -0.54993800 | -2.24884000 | 2.28416300  |
| C  | -5.54199200 | -0.79612100 | -0.31855000 |
| H  | -6.05430700 | -1.15622000 | -1.22417200 |
| H  | -5.67287900 | 0.29890100  | -0.28923200 |
| H  | -6.06265100 | -1.21660400 | 0.55379900  |
| C  | -1.12302300 | -0.97812000 | -2.71438000 |
| H  | -1.74864100 | -0.60096100 | -3.53593900 |
| H  | -0.63317800 | -1.90701300 | -3.04458800 |
| H  | -0.30894500 | -0.25511900 | -2.52744900 |
| Al | 0.72707700  | 0.96437000  | -0.11632800 |
| C  | -1.21852400 | 1.50755700  | 0.14496700  |
| N  | -1.98871600 | 1.33570700  | 1.24807300  |
| C  | -3.25332600 | 1.86803200  | 1.07431500  |
| C  | -3.27179900 | 2.41123400  | -0.17981900 |
| N  | -2.01764800 | 2.18315900  | -0.72013300 |
| C  | -1.63680700 | 2.56870500  | -2.05604100 |
| H  | -0.61716900 | 2.19324000  | -2.23728300 |
| H  | -1.63848400 | 3.66312100  | -2.16575000 |
| H  | -2.32233500 | 2.12749600  | -2.79446400 |
| C  | -4.35817600 | 3.08540000  | -0.93145900 |

|   |             |             |             |
|---|-------------|-------------|-------------|
| H | -4.06201500 | 4.09118100  | -1.26948800 |
| H | -5.24873700 | 3.19517300  | -0.29931500 |
| H | -4.65135900 | 2.50925600  | -1.82452500 |
| C | -4.31018500 | 1.76505500  | 2.10834600  |
| H | -5.22867400 | 2.26211700  | 1.77099200  |
| H | -4.00609000 | 2.23138600  | 3.05877000  |
| H | -4.55312100 | 0.71009000  | 2.31636900  |
| C | -1.53021000 | 0.74366000  | 2.47971200  |
| H | -1.60076000 | 1.47212400  | 3.30190500  |
| H | -0.47659900 | 0.45589300  | 2.34887400  |
| H | -2.11992800 | -0.14805000 | 2.72492200  |

13) Alumylene (singlet ground state) derived from dialumene **II**

Note: The ground state for the alumylene from **II** is singlet ( $\Delta G_{\text{singlet-triplet}} = 15.8$  kcal/mol).

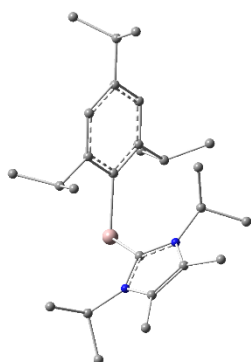

Hydrogen atoms are omitted for clarity.

Number of imaginary frequencies = 0

$E_{\text{total}} = -1366.347523$  a.u

$G_{\text{correction}} = 0.574632$  a.u

Cartesian coordinates:

|    |             |             |             |
|----|-------------|-------------|-------------|
| Al | -0.62956400 | 0.25946700  | 2.17707700  |
| N  | -3.07555500 | -0.21092300 | 0.26996900  |
| N  | -1.72440400 | 1.13098500  | -0.72790500 |
| C  | 1.08690600  | -0.06397500 | 1.07675300  |
| C  | 2.15732900  | 0.85527900  | 1.07342600  |
| C  | 3.32360800  | 0.59233400  | 0.34630200  |
| C  | 3.47556700  | -0.58056000 | -0.39516600 |
| C  | 2.42840800  | -1.50539600 | -0.37334300 |
| C  | 1.25744100  | -1.26095000 | 0.35008500  |
| C  | 2.06043400  | 2.12813400  | 1.90124300  |
| C  | 2.50236600  | 3.38519400  | 1.15799300  |
| C  | 2.81322200  | 1.96583300  | 3.22086800  |
| C  | 4.73015700  | -0.83258900 | -1.20500800 |
| C  | 5.46000800  | -2.09612000 | -0.75178000 |
| C  | 4.42776200  | -0.87166300 | -2.70315300 |
| C  | 0.15323700  | -2.30490200 | 0.33939600  |
| C  | 0.61149800  | -3.63602900 | 0.93065600  |
| C  | -0.44972200 | -2.48457600 | -1.05244300 |

|   |             |             |             |
|---|-------------|-------------|-------------|
| C | -1.87263100 | 0.39831600  | 0.39977200  |
| C | -3.67444300 | 0.11635600  | -0.93888200 |
| C | -2.81405700 | 0.97376000  | -1.57361100 |
| C | -3.62585200 | -1.04377700 | 1.34663500  |
| C | -4.93042500 | -0.48236000 | 1.88872600  |
| C | -3.69906600 | -2.51778300 | 0.98210600  |
| C | -4.99930500 | -0.37059400 | -1.40631800 |
| C | -2.99020400 | 1.64406000  | -2.88934200 |
| C | -0.54077700 | 1.97242400  | -0.94601400 |
| C | 0.37798700  | 1.42001400  | -2.02391000 |
| C | -0.90669300 | 3.43739300  | -1.13351400 |
| H | 4.14452200  | 1.31713700  | 0.34690700  |
| H | 2.52886800  | -2.43723700 | -0.94030000 |
| H | 0.99026300  | 2.26069500  | 2.16318800  |
| H | 3.58257000  | 3.37053300  | 0.94339500  |
| H | 2.30245000  | 4.28579300  | 1.75963100  |
| H | 1.97848000  | 3.49395500  | 0.19566900  |
| H | 2.42499500  | 1.10441700  | 3.78471600  |
| H | 2.71313700  | 2.86370900  | 3.85176000  |
| H | 3.88592300  | 1.79340200  | 3.03641000  |
| H | 5.40311900  | 0.02355500  | -1.02393400 |
| H | 4.84364800  | -2.99389000 | -0.91902500 |
| H | 5.69864600  | -2.05292700 | 0.32135700  |
| H | 6.40076300  | -2.23065700 | -1.30921700 |
| H | 3.75987300  | -1.71274000 | -2.94979600 |
| H | 5.35073600  | -0.99437200 | -3.29237500 |
| H | 3.93066300  | 0.05389300  | -3.03137400 |
| H | -0.65084500 | -1.92554900 | 1.00276900  |
| H | 1.02034100  | -3.49575600 | 1.94214500  |
| H | 1.39853300  | -4.09620900 | 0.31230300  |
| H | -0.22445400 | -4.35172100 | 0.99204100  |
| H | -1.25796300 | -3.23394800 | -1.05003900 |
| H | 0.31405400  | -2.82933900 | -1.76744200 |
| H | -0.86228800 | -1.53865800 | -1.43447200 |
| H | -2.87426400 | -0.93378100 | 2.15324400  |
| H | -5.19757100 | -1.01663300 | 2.81203500  |
| H | -5.76887500 | -0.59646300 | 1.18661400  |
| H | -4.81687700 | 0.58283800  | 2.13729600  |
| H | -3.94520400 | -3.10137900 | 1.88144000  |
| H | -2.73464400 | -2.87710200 | 0.59939400  |
| H | -4.47126200 | -2.73225200 | 0.22854800  |
| H | -5.83398500 | 0.12734300  | -0.88809000 |
| H | -5.11714100 | -1.45312800 | -1.26307400 |
| H | -5.11311400 | -0.16644300 | -2.47891800 |
| H | -3.27406900 | 2.70270800  | -2.78173400 |
| H | -3.78948300 | 1.14773000  | -3.45514400 |
| H | -2.07906600 | 1.60389900  | -3.50131200 |
| H | 0.00954700  | 1.88065300  | -0.00118500 |
| H | 0.66674500  | 0.38678300  | -1.78635500 |
| H | 1.30069900  | 2.01763500  | -2.05140900 |
| H | -0.07355700 | 1.45054200  | -3.02669600 |
| H | 0.00389500  | 4.04917300  | -1.05810400 |
| H | -1.60385500 | 3.77132100  | -0.35091900 |
| H | -1.35644600 | 3.64204000  | -2.11527400 |

14) Alumylene (triplet ground state) derived from dialumene **II**

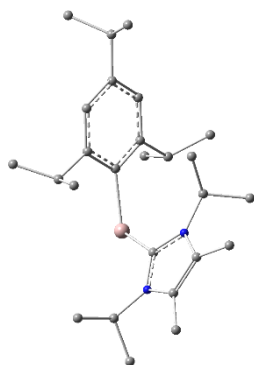

Hydrogen atoms are omitted for clarity.

Number of imaginary frequencies = 0

$E_{\text{total}} = -1366.321338 \text{ a.u}$

$G_{\text{correction}} = 0.571827 \text{ a.u}$

Cartesian coordinates:

|    |             |             |             |
|----|-------------|-------------|-------------|
| Al | -0.68845200 | -0.05086300 | 1.84404800  |
| N  | -3.30123500 | -0.18049900 | 0.31737500  |
| N  | -1.83318000 | 0.98477400  | -0.77809300 |
| C  | 1.17320200  | -0.19376600 | 1.08287200  |
| C  | 2.11713500  | 0.85604500  | 1.17114900  |
| C  | 3.32686300  | 0.77763400  | 0.47418600  |
| C  | 3.64659500  | -0.32379700 | -0.32075900 |
| C  | 2.73303200  | -1.37728500 | -0.37378800 |
| C  | 1.52071800  | -1.33724200 | 0.32258000  |
| C  | 1.84179200  | 2.05738900  | 2.05754200  |
| C  | 2.29668900  | 3.38870000  | 1.47017200  |
| C  | 2.42623400  | 1.83334000  | 3.45182000  |
| C  | 4.94193700  | -0.36722100 | -1.10364100 |
| C  | 5.81847500  | -1.55036300 | -0.69583400 |
| C  | 4.67933500  | -0.36129500 | -2.60975100 |
| C  | 0.58976800  | -2.53570300 | 0.22574900  |
| C  | 1.29576300  | -3.85394100 | 0.53092800  |
| C  | -0.14370400 | -2.58949200 | -1.11263000 |
| C  | -2.01644100 | 0.28440200  | 0.38488700  |
| C  | -3.90244700 | 0.20129400  | -0.87317000 |
| C  | -2.97500400 | 0.93121300  | -1.56684000 |
| C  | -3.83399100 | -1.07426500 | 1.34389000  |
| C  | -5.09646000 | -0.53744300 | 1.99876500  |
| C  | -3.95316900 | -2.50425300 | 0.83585200  |
| C  | -5.30746600 | -0.09807800 | -1.25713800 |
| C  | -3.12428300 | 1.57552700  | -2.89893600 |
| C  | -0.62156500 | 1.77319500  | -1.01555600 |
| C  | 0.27936500  | 1.18386700  | -2.08917900 |
| C  | -0.92693400 | 3.25106800  | -1.21684000 |
| H  | 4.04830700  | 1.59753300  | 0.54173900  |
| H  | 2.97188100  | -2.25800800 | -0.97802600 |
| H  | 0.73872900  | 2.10467900  | 2.17649800  |
| H  | 3.39465400  | 3.46368700  | 1.41843100  |
| H  | 1.94532500  | 4.22524000  | 2.09409600  |
| H  | 1.90557500  | 3.53606700  | 0.45141500  |
| H  | 2.03045900  | 0.90770100  | 3.89630400  |
| H  | 2.18166300  | 2.67058800  | 4.12528100  |

|   |             |             |             |
|---|-------------|-------------|-------------|
| H | 3.52352400  | 1.74017900  | 3.40451700  |
| H | 5.49375300  | 0.55676700  | -0.85811900 |
| H | 5.32844000  | -2.50899400 | -0.92941800 |
| H | 6.02493200  | -1.53777200 | 0.38475600  |
| H | 6.78124700  | -1.53049700 | -1.23092500 |
| H | 4.13208800  | -1.26624100 | -2.91906700 |
| H | 5.62330800  | -0.33096300 | -3.17712600 |
| H | 4.07344900  | 0.50935500  | -2.90347300 |
| H | -0.18079300 | -2.38932700 | 1.01026600  |
| H | 1.81887800  | -3.80793000 | 1.49780700  |
| H | 2.03967500  | -4.11109400 | -0.24032600 |
| H | 0.56990900  | -4.68157400 | 0.57252600  |
| H | -0.81287500 | -3.46445300 | -1.16073900 |
| H | 0.56483900  | -2.66345800 | -1.95410100 |
| H | -0.75652100 | -1.68798600 | -1.26368000 |
| H | -3.03850100 | -1.07797000 | 2.11224500  |
| H | -5.32655300 | -1.13422100 | 2.89383100  |
| H | -5.97233900 | -0.58862400 | 1.33600000  |
| H | -4.95489000 | 0.50665400  | 2.31359600  |
| H | -4.20966100 | -3.17584800 | 1.66832400  |
| H | -2.99303700 | -2.83505200 | 0.41291400  |
| H | -4.73063000 | -2.61573400 | 0.06587200  |
| H | -6.02999000 | 0.48521700  | -0.66435600 |
| H | -5.56202100 | -1.16055600 | -1.13697600 |
| H | -5.46707100 | 0.16107700  | -2.31168400 |
| H | -3.30041900 | 2.66057000  | -2.82643200 |
| H | -3.98030900 | 1.13981000  | -3.43077800 |
| H | -2.23567700 | 1.42504000  | -3.52722700 |
| H | -0.07704700 | 1.68466700  | -0.06409600 |
| H | 0.52671500  | 0.13993600  | -1.85675700 |
| H | 1.22568300  | 1.74413900  | -2.11522400 |
| H | -0.17011000 | 1.23173500  | -3.09266300 |
| H | 0.00962600  | 3.82368900  | -1.14979600 |
| H | -1.60495900 | 3.61877400  | -0.43248300 |
| H | -1.37110800 | 3.46730800  | -2.19851700 |



## 2.5. Frontier orbitals of alumylene 7 and its base-free version

15) Alumylene 7 (singlet ground state)

Note: Energies of 7 are already given in Section 2.3.

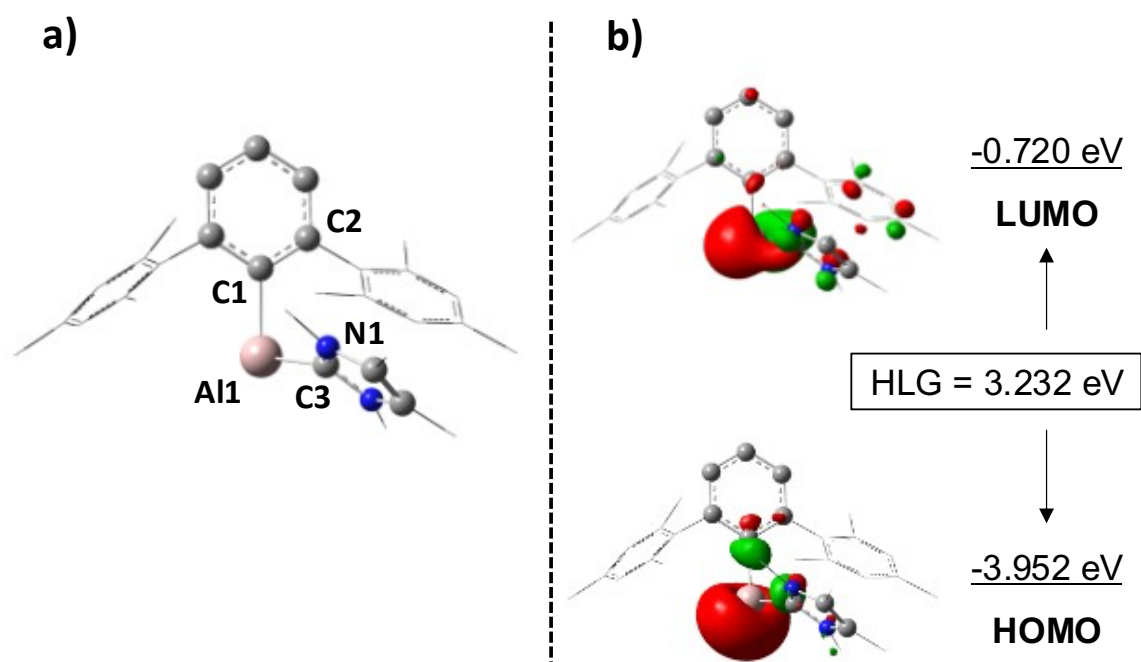

**Figure S33.** Computed structure (a) and frontier orbitals ( $\pm 0.05$  isovalue) (b) of alumylene 7. HLG: HOMO-LUMO gap. Hydrogens are omitted for clarity. Mesityl groups of the terphenyl substituent and the methyl groups of the NHC are depicted in wireframe style for simplicity. Selected bond lengths [ $\text{\AA}$ ] and bond angles [ $^\circ$ ]: Al1-C1 2.072, Al1-C3 2.128, C1-Al1-C3 96.4, C2-C1-Al1-C3 69.2, N1-C3-Al1-C1 61.6.

16) Base-free alumylene (singlet ground state) derived from alumylene 7

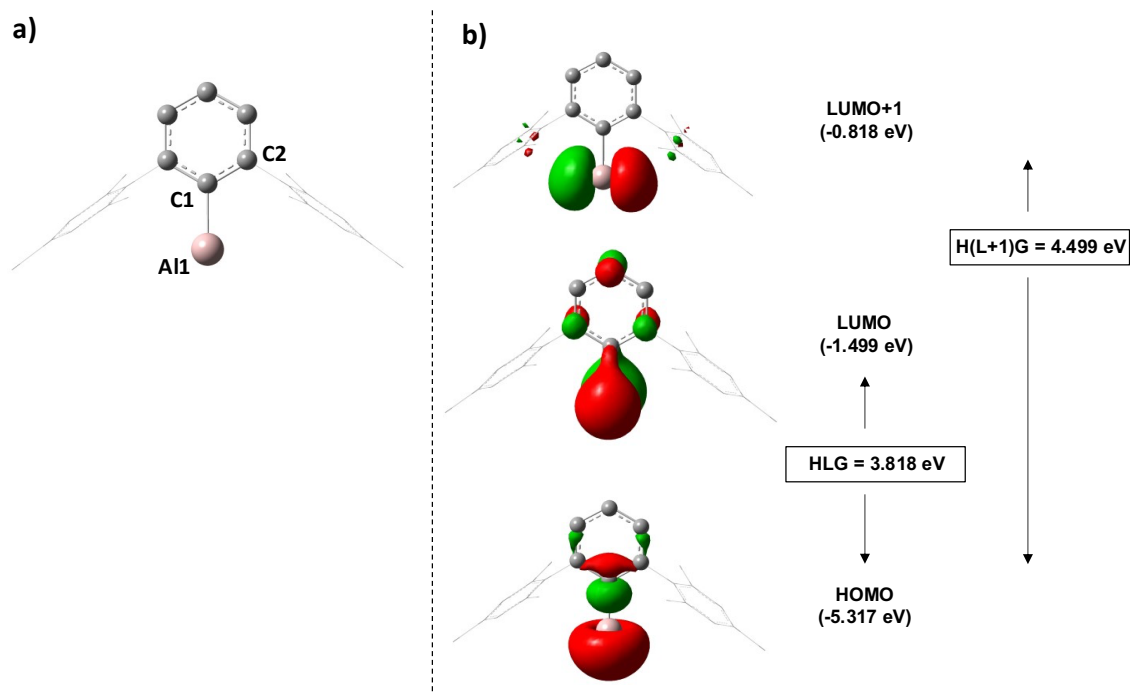

**Figure S34.** Computed structure (a) and frontier orbitals ( $\pm 0.05$  isovalue) (b) of base-free alumylene derived from alumylene 7. Hydrogens are omitted for clarity. Mesityls of the terphenyl substituent are depicted in wireframe style for simplicity. Selected bond lengths [ $\text{\AA}$ ] and bond angles [ $^\circ$ ]: Al1-C1 2.029, C1-C2 1.407.

Number of imaginary frequencies = 0

$E_{\text{total}} = -1170.163693$  a.u

$G_{\text{correction}} = 0.355950$  a.u

Cartesian coordinates:

|   |             |             |             |
|---|-------------|-------------|-------------|
| C | -0.00002800 | 0.47970200  | 0.01734100  |
| C | -1.21169700 | 1.19500900  | 0.04089400  |
| C | -1.21153500 | 2.59220800  | 0.08707400  |
| H | -2.15882400 | 3.13890800  | 0.10516900  |
| C | 0.00010200  | 3.28405900  | 0.10997400  |
| H | 0.00015600  | 4.37658700  | 0.14619300  |
| C | 1.21166100  | 2.59208900  | 0.08696400  |
| H | 2.15900700  | 3.13869400  | 0.10496200  |
| C | 1.21170600  | 1.19487800  | 0.04078600  |
| C | 2.47141900  | 0.39416900  | 0.01356000  |
| C | 3.04286400  | -0.05846000 | 1.21939600  |
| C | 4.18069800  | -0.86719200 | 1.16869300  |
| H | 4.62245900  | -1.21591700 | 2.10703100  |
| C | 4.76609000  | -1.24207000 | -0.04256500 |
| C | 4.18576000  | -0.77798800 | -1.22495500 |
| H | 4.63138800  | -1.05618900 | -2.18476800 |
| C | 3.04804400  | 0.03256500  | -1.22010900 |
| C | 2.44585700  | 0.50864200  | -2.51142300 |
| H | 1.41533200  | 0.13827500  | -2.63570300 |
| H | 3.03626200  | 0.17094300  | -3.37409900 |

|    |             |             |             |
|----|-------------|-------------|-------------|
| H  | 2.37919500  | 1.60681500  | -2.54257000 |
| C  | 5.96399700  | -2.14621600 | -0.07338500 |
| H  | 6.59289200  | -2.01401100 | 0.81900900  |
| H  | 6.58547400  | -1.96329800 | -0.96193800 |
| H  | 5.65537100  | -3.20473800 | -0.10202500 |
| C  | 2.43542100  | 0.32056200  | 2.54008600  |
| H  | 3.02668100  | -0.07386300 | 3.37774200  |
| H  | 1.40726300  | -0.06468700 | 2.63595300  |
| H  | 2.36108300  | 1.41324800  | 2.64900100  |
| C  | -2.47141700 | 0.39430000  | 0.01376500  |
| C  | -3.04255100 | -0.05864100 | 1.21957400  |
| C  | -4.18036800 | -0.86749700 | 1.16890900  |
| H  | -4.62190500 | -1.21649000 | 2.10724500  |
| C  | -4.76595600 | -1.24212900 | -0.04226500 |
| C  | -4.18590300 | -0.77769000 | -1.22471700 |
| H  | -4.63169700 | -1.05570400 | -2.18451400 |
| C  | -3.04830600 | 0.03293300  | -1.21991700 |
| C  | -2.44639500 | 0.50941100  | -2.51120900 |
| H  | -2.38018400 | 1.60761700  | -2.54221700 |
| H  | -3.03672300 | 0.17159400  | -3.37389200 |
| H  | -1.41572300 | 0.13949500  | -2.63558000 |
| C  | -5.96377500 | -2.14638000 | -0.07342700 |
| H  | -5.65503900 | -3.20442500 | -0.11537500 |
| H  | -6.59183900 | -1.95464200 | -0.95551000 |
| H  | -6.58611800 | -2.02352400 | 0.82483300  |
| C  | -2.43495200 | 0.32017900  | 2.54025100  |
| H  | -3.02598100 | -0.07458000 | 3.37791200  |
| H  | -2.36084700 | 1.41285800  | 2.64941000  |
| H  | -1.40668600 | -0.06484200 | 2.63585800  |
| Al | -0.00041500 | -1.54821400 | -0.05168400 |

## 2.6. Mechanisms explored for the formation of benzene deconstruction product and C-H activation product using model alumylene 7'

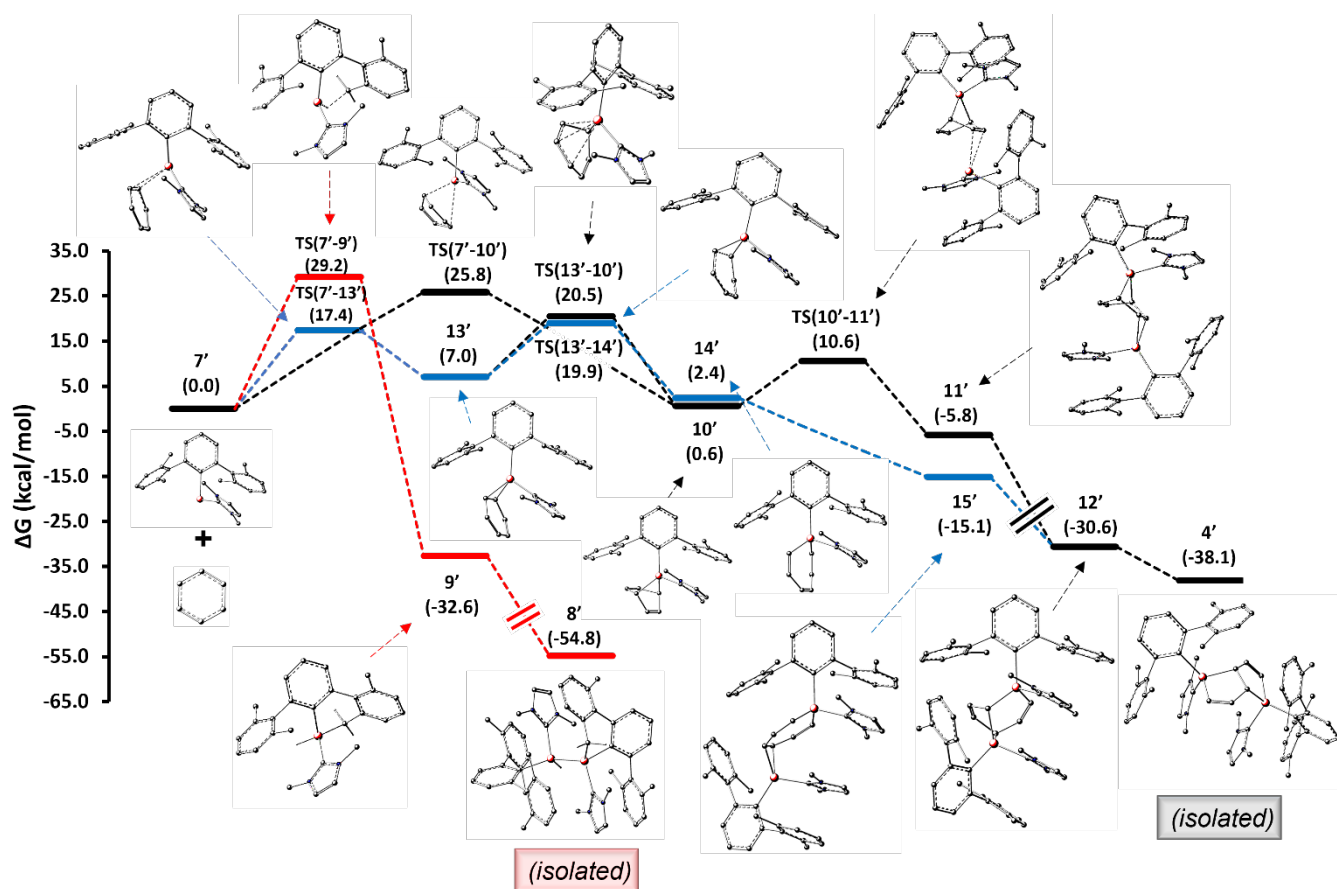

**Figure S35.** Mechanisms computed for the formation of benzene deconstruction product 4' (black and blue pathways) and the C-H activation product 8' (red pathway) from alumylene 7'. Free energies in parentheses are in kcal/mol.

### 17) Alumylene (7')

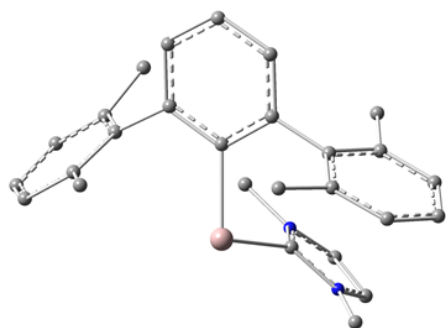

(Hydrogens are omitted for clarity)

Number of imaginary frequencies = 0

$E_{\text{total}} = -1395.961237$  a.u

$G_{\text{correction}} = 0.431441 \text{ a.u}$

Cartesian coordinates:

|    |             |             |             |
|----|-------------|-------------|-------------|
| C  | -0.46925500 | -0.87791800 | 0.12540300  |
| C  | -1.78972000 | -1.20034500 | 0.52213600  |
| C  | -2.04390800 | -2.22383800 | 1.44327300  |
| H  | -3.07744000 | -2.44502200 | 1.72579700  |
| C  | -0.99738900 | -2.95815800 | 1.99360400  |
| H  | -1.20112000 | -3.76080600 | 2.70676200  |
| C  | 0.31187800  | -2.66083800 | 1.62418600  |
| H  | 1.14632500  | -3.22773200 | 2.04845900  |
| C  | 0.57230900  | -1.63896600 | 0.70400600  |
| C  | 1.99646000  | -1.37270600 | 0.33738500  |
| C  | 2.56965400  | -2.02601300 | -0.77344100 |
| C  | 3.92626000  | -1.82139300 | -1.05447900 |
| H  | 4.37510700  | -2.33452400 | -1.90910900 |
| C  | 4.70541700  | -0.99417600 | -0.25194200 |
| C  | 4.13021600  | -0.34192700 | 0.83661400  |
| H  | 4.73960300  | 0.31111700  | 1.46758800  |
| C  | 2.77783000  | -0.51992100 | 1.14448800  |
| C  | 2.17557200  | 0.15470300  | 2.34230800  |
| H  | 1.97865900  | -0.57132800 | 3.14732400  |
| H  | 1.20770100  | 0.61089300  | 2.09272500  |
| H  | 2.84319500  | 0.93285300  | 2.73874500  |
| C  | 1.75540100  | -2.97428500 | -1.60740900 |
| H  | 2.34054700  | -3.35852600 | -2.45412200 |
| H  | 0.85252400  | -2.48695500 | -2.00740300 |
| H  | 1.41020400  | -3.82946300 | -1.00550500 |
| C  | -2.94077900 | -0.42488000 | -0.03161700 |
| C  | -3.38181500 | -0.66961700 | -1.35126100 |
| C  | -4.41035600 | 0.11726800  | -1.87796000 |
| H  | -4.74502400 | -0.06478000 | -2.90264400 |
| C  | -5.01371100 | 1.11330900  | -1.11691200 |
| C  | -4.61798400 | 1.30832200  | 0.20166200  |
| H  | -5.11499100 | 2.06574400  | 0.81485600  |
| C  | -3.59650500 | 0.53641100  | 0.76610300  |
| C  | -3.26552600 | 0.70914700  | 2.22391700  |
| H  | -3.90249600 | 0.05606900  | 2.84368800  |
| H  | -3.44620800 | 1.74306900  | 2.55490300  |
| H  | -2.22823900 | 0.43291700  | 2.45517100  |
| C  | -2.78449500 | -1.77403700 | -2.17317300 |
| H  | -3.41502500 | -1.99797700 | -3.04488500 |
| H  | -2.65823300 | -2.69149700 | -1.57992100 |
| H  | -1.78423400 | -1.49111300 | -2.54948500 |
| Al | -0.02183500 | 0.34202100  | -1.47889000 |
| C  | 1.02016000  | 1.87351200  | -0.45323000 |
| N  | 0.54208700  | 2.77624900  | 0.43909000  |
| C  | 1.39647200  | 3.84724200  | 0.57537300  |
| C  | 2.45009000  | 3.60507500  | -0.25073800 |
| N  | 2.19414400  | 2.40530100  | -0.87362600 |
| C  | 3.04314500  | 1.77202100  | -1.85675100 |
| H  | 3.69061600  | 1.01904200  | -1.38823800 |
| H  | 3.65338500  | 2.53379500  | -2.35917800 |
| H  | 2.39561500  | 1.27055400  | -2.59723300 |
| C  | -0.72935900 | 2.62689400  | 1.10360500  |
| H  | -0.66324400 | 2.99556300  | 2.13578100  |
| H  | -0.97911400 | 1.55898000  | 1.11689500  |

|   |             |             |             |
|---|-------------|-------------|-------------|
| H | -1.52630600 | 3.16697000  | 0.56985700  |
| H | 5.76601700  | -0.85459600 | -0.47644600 |
| H | -5.81013800 | 1.72548400  | -1.54727300 |
| H | 3.35070800  | 4.18264300  | -0.44061200 |
| H | 1.19148000  | 4.68218200  | 1.23991200  |

### 18) Benzene

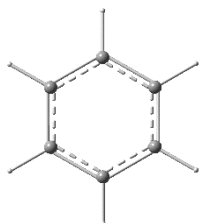

Number of imaginary frequencies = 0

$E_{\text{total}} = -231.811400$  a.u

$G_{\text{correction}} = 0.073809$  a.u

Cartesian coordinates:

|   |             |             |             |
|---|-------------|-------------|-------------|
| C | 1.09521100  | 0.86353400  | 0.00000000  |
| C | -0.20030100 | 1.38010300  | 0.00000700  |
| C | -1.29550300 | 0.51665300  | -0.00000900 |
| C | -1.09519800 | -0.86355100 | 0.00000100  |
| C | 0.20027900  | -1.38010600 | 0.00000700  |
| C | 1.29551100  | -0.51663300 | -0.00000400 |
| H | 1.95357400  | 1.54047900  | -0.00000300 |
| H | -0.35721900 | 2.46197700  | 0.00000400  |
| H | -2.31086700 | 0.92172500  | -0.00001200 |
| H | -1.95360200 | -1.54044300 | 0.00000000  |
| H | 0.35726200  | -2.46197100 | 0.00000600  |
| H | 2.31085100  | -0.92176700 | -0.00000400 |

### 19) TS[7<sup>-</sup>-10<sup>+</sup>]

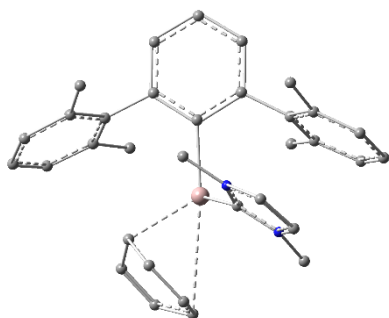

(Hydrogens are omitted for clarity)

Number of imaginary frequencies = 1 (140.5  $\text{cm}^{-1}$ )

$E_{\text{total}} = -1627.762082$  a.u

$G_{\text{correction}} = 0.528362$  a.u

Cartesian coordinates:

|    |             |             |             |
|----|-------------|-------------|-------------|
| C  | 1.55623500  | 3.63400500  | -1.79835700 |
| C  | 0.29420900  | 3.92706600  | -1.19124800 |
| C  | 0.17332200  | 3.78422400  | 0.20540000  |
| C  | 1.03172900  | 2.92012900  | 0.86188200  |
| C  | 1.90872000  | 2.12059100  | 0.03646200  |
| C  | 2.39641900  | 2.77048700  | -1.16510000 |
| H  | 1.80853200  | 4.07381800  | -2.76663900 |
| H  | -0.42719800 | 4.54668400  | -1.73057800 |
| H  | -0.61266100 | 4.31675600  | 0.74971800  |
| H  | 0.98951500  | 2.77857000  | 1.94449400  |
| H  | 3.35922600  | 2.47559900  | -1.58665600 |
| H  | 2.60738300  | 1.45602700  | 0.55570600  |
| Al | 0.15071900  | 0.78484700  | -0.53782400 |
| C  | 0.32185800  | -1.25221200 | -0.24589800 |
| C  | -1.33769000 | 1.19328400  | 0.88893400  |
| C  | -0.81361400 | -2.08170900 | -0.44196800 |
| C  | 1.56347400  | -1.92060100 | -0.09685500 |
| N  | -1.36948600 | 0.82848700  | 2.19188000  |
| N  | -2.50388900 | 1.84303600  | 0.68761100  |
| C  | -0.71276100 | -3.47843700 | -0.45285300 |
| C  | -2.17667600 | -1.51172500 | -0.67377100 |
| C  | 1.65333800  | -3.31862000 | -0.10366000 |
| C  | 2.84278800  | -1.16389500 | 0.05005200  |
| C  | -2.53397900 | 1.24390500  | 2.79789800  |
| C  | -3.25569300 | 1.88183900  | 1.83921600  |
| H  | -1.61491900 | -4.07763200 | -0.60926700 |
| C  | 0.51815400  | -4.10279700 | -0.27807800 |
| C  | -3.12976500 | -1.52506500 | 0.36507300  |
| C  | -2.53453000 | -1.04585000 | -1.95795700 |
| H  | 2.63291200  | -3.78970400 | 0.01982900  |
| C  | 3.46140900  | -1.04592300 | 1.31022400  |
| C  | 3.45358200  | -0.60699000 | -1.09513000 |
| H  | 0.59347000  | -5.19298200 | -0.29054300 |
| C  | -4.41256400 | -1.02230800 | 0.12365100  |
| C  | -3.83292400 | -0.56957000 | -2.16812300 |
| C  | 4.66139300  | -0.33254600 | 1.41739000  |
| C  | 4.66566800  | 0.07317300  | -0.95336100 |
| H  | -5.14640100 | -1.02211000 | 0.93455900  |
| C  | -4.76623100 | -0.54814500 | -1.13575200 |
| H  | -4.11355900 | -0.21794000 | -3.16471400 |
| H  | 5.13196100  | -0.22374400 | 2.39875100  |
| C  | 5.26322800  | 0.22353500  | 0.29472300  |
| H  | 5.14320900  | 0.49794200  | -1.84059000 |
| H  | 6.20307800  | 0.77247800  | 0.39046800  |
| H  | -5.77739300 | -0.17455700 | -1.31788600 |
| H  | -2.75397400 | 1.04741000  | 3.84354700  |
| H  | -4.23630200 | 2.34740000  | 1.87802100  |
| C  | -1.55605100 | -1.08673500 | -3.09601200 |
| H  | -2.05917500 | -0.90291900 | -4.05541100 |
| H  | -0.77501300 | -0.31418700 | -2.97116300 |
| H  | -1.03855200 | -2.05604600 | -3.14504600 |
| C  | -2.80276800 | -2.11383500 | 1.70794500  |
| H  | -3.43321800 | -1.67773900 | 2.49661700  |
| H  | -2.97600800 | -3.20279800 | 1.70914000  |
| H  | -1.74642800 | -1.97084800 | 1.96796900  |

|   |             |             |             |
|---|-------------|-------------|-------------|
| C | 2.80291500  | -0.70530700 | -2.44225900 |
| H | 3.51529400  | -0.46985600 | -3.24511300 |
| H | 2.38024100  | -1.70461100 | -2.62022200 |
| H | 1.96288200  | 0.01214200  | -2.51748000 |
| C | 2.88197500  | -1.69054300 | 2.53950200  |
| H | 2.99861900  | -1.04147400 | 3.42091100  |
| H | 1.82025200  | -1.93784400 | 2.41468700  |
| H | 3.40017200  | -2.63747700 | 2.76529300  |
| C | -2.91912900 | 2.44310700  | -0.56187700 |
| H | -2.12708400 | 2.26243200  | -1.30333800 |
| H | -3.85950700 | 1.98860400  | -0.89834300 |
| H | -3.04082500 | 3.52832600  | -0.43351500 |
| C | -0.27690200 | 0.17501500  | 2.87310600  |
| H | 0.30465100  | -0.38793700 | 2.13222200  |
| H | 0.37525000  | 0.91164400  | 3.36592100  |
| H | -0.66899100 | -0.52239700 | 3.62473300  |

## 20) Intermediate 10'

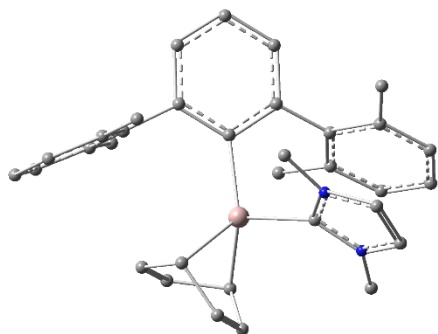

(Hydrogens are omitted for clarity)

Number of imaginary frequencies = 0

$E_{\text{total}} = -1627.805958$  a.u

$G_{\text{correction}} = 0.531337$  a.u

Cartesian coordinates:

|    |             |             |             |
|----|-------------|-------------|-------------|
| C  | -1.54456900 | -1.78596600 | -2.25492000 |
| C  | -0.04503400 | -1.90382600 | -2.10349800 |
| C  | 0.27975100  | -3.24566500 | -1.50112100 |
| C  | -0.40134300 | -3.51886100 | -0.36656100 |
| C  | -1.36491400 | -2.44272800 | 0.04700100  |
| C  | -2.23075400 | -2.07212700 | -1.12745100 |
| H  | -2.01925300 | -1.52386900 | -3.20514400 |
| H  | 0.52610100  | -1.65010000 | -3.00543200 |
| H  | 0.97467200  | -3.94895600 | -1.97131100 |
| H  | -0.30093400 | -4.45772400 | 0.18755800  |
| H  | -3.32019000 | -2.04669700 | -1.05365300 |
| H  | -1.91321900 | -2.63511700 | 0.97588500  |
| Al | -0.07726500 | -0.89276800 | -0.31931000 |
| C  | -0.47967700 | 1.05111000  | 0.08287900  |
| C  | 1.66253400  | -1.30133100 | 0.77080700  |
| C  | 0.57964600  | 1.99447500  | 0.09259300  |



|   |             |             |             |
|---|-------------|-------------|-------------|
| C | -1.75143300 | 1.52490300  | 0.48991300  |
| N | 1.76055100  | -1.23401700 | 2.11707600  |
| N | 2.85340000  | -1.78621600 | 0.36506000  |
| C | 0.39247800  | 3.30754300  | 0.54305700  |
| C | 1.93112700  | 1.65494000  | -0.44521800 |
| C | -1.92136900 | 2.83841400  | 0.95340400  |
| C | -3.00982100 | 0.72736100  | 0.34763000  |
| C | 2.99066400  | -1.67303300 | 2.55089500  |
| C | 3.68562900  | -2.01928400 | 1.43508300  |
| H | 1.23322000  | 4.00657400  | 0.52161600  |
| C | -0.85277600 | 3.72608500  | 0.99728400  |
| C | 3.05090500  | 1.59342800  | 0.40971100  |
| C | 2.09254800  | 1.48163100  | -1.83897300 |
| H | -2.91901100 | 3.16450800  | 1.26081200  |
| C | -3.55677900 | -0.00390500 | 1.41574400  |
| C | -3.70287000 | 0.81752000  | -0.87885300 |
| H | -0.99654600 | 4.74820600  | 1.35669300  |
| C | 4.31048200  | 1.31584600  | -0.13221200 |
| C | 3.37037700  | 1.22091300  | -2.34508300 |
| C | -4.78232600 | -0.65702300 | 1.23732500  |
| C | -4.93096100 | 0.16848900  | -1.01646000 |
| H | 5.17589800  | 1.25801200  | 0.53411300  |
| C | 4.47308600  | 1.13191000  | -1.50105200 |
| H | 3.49884600  | 1.10140400  | -3.42428500 |
| H | -5.20508700 | -1.23077300 | 2.06679900  |
| C | -5.46916600 | -0.57145000 | 0.03267300  |
| H | -5.46679400 | 0.23965100  | -1.96670200 |
| H | -6.42930300 | -1.07893600 | -0.08879400 |
| H | 5.46499200  | 0.93156800  | -1.91463600 |
| H | 3.26924800  | -1.69364200 | 3.60076700  |
| H | 4.69546700  | -2.40135500 | 1.31528800  |
| C | 0.93394100  | 1.63211200  | -2.78396200 |
| H | 1.28789100  | 1.72452000  | -3.82018000 |
| H | 0.25596500  | 0.76616800  | -2.73653500 |
| H | 0.33111600  | 2.51804600  | -2.53637900 |
| C | 2.93098500  | 1.85303400  | 1.88545900  |
| H | 3.66707500  | 1.26165600  | 2.44963500  |
| H | 3.12104700  | 2.91502200  | 2.11313700  |
| H | 1.92519200  | 1.62915700  | 2.26217200  |
| C | -3.12016200 | 1.58104700  | -2.03104700 |
| H | -3.81228600 | 1.59826600  | -2.88430700 |
| H | -2.87866200 | 2.61860000  | -1.75451700 |
| H | -2.17963200 | 1.11258700  | -2.36002300 |
| C | -2.84686500 | -0.12079300 | 2.73325500  |
| H | -2.17504000 | -0.99409400 | 2.72738600  |
| H | -2.23849500 | 0.76853200  | 2.95013900  |
| H | -3.56099700 | -0.26220200 | 3.55730400  |
| C | 3.22423400  | -2.05063100 | -1.00760000 |
| H | 2.51441900  | -1.54258600 | -1.66712600 |
| H | 4.23094000  | -1.65679400 | -1.19366100 |
| H | 3.18883400  | -3.13004900 | -1.20711800 |
| C | 0.68912400  | -0.80448000 | 2.98682800  |
| H | 0.05319500  | -0.09197400 | 2.44699300  |
| H | 0.07849800  | -1.66178500 | 3.30449000  |
| H | 1.10947400  | -0.30613000 | 3.86992200  |

## 21) TS[10<sup>-11</sup>']

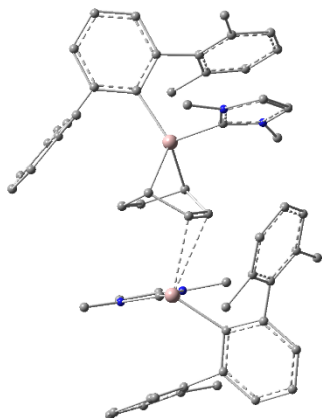

(Hydrogens are omitted for clarity)

Number of imaginary frequencies = 1 (89.8 cm<sup>-1</sup>)

E<sub>total</sub> = -3023.793632 a.u

G<sub>correction</sub> = 0.991519 a.u

Cartesian coordinates:

|    |             |             |             |
|----|-------------|-------------|-------------|
| C  | -0.29990500 | 1.65858600  | 0.83363000  |
| C  | -0.64114000 | 0.24335700  | 1.23591900  |
| C  | 0.20397400  | -0.71996900 | 0.45255500  |
| C  | 0.20611100  | -0.49390000 | -0.90008200 |
| C  | -0.65883400 | 0.66030600  | -1.32136800 |
| C  | -0.30099000 | 1.86504200  | -0.50142800 |
| H  | -0.03570600 | 2.42513500  | 1.56911900  |
| H  | -0.67523200 | 0.06784100  | 2.31857900  |
| H  | 0.69627000  | -1.58573900 | 0.89805700  |
| H  | 0.57880600  | -1.22605100 | -1.61920200 |
| H  | -0.05804700 | 2.81769300  | -0.97475500 |
| H  | -0.67238000 | 0.84592900  | -2.39987000 |
| Al | -2.22068400 | 0.16531100  | -0.08521100 |
| C  | -3.97892300 | 1.15745600  | -0.04028200 |
| C  | -2.68155200 | -1.82332600 | -0.50661200 |
| C  | -5.08581800 | 0.59556000  | 0.64194700  |
| C  | -4.22466700 | 2.34581800  | -0.77257400 |
| N  | -3.14651600 | -2.27674900 | -1.69147100 |
| N  | -2.58051900 | -2.92399200 | 0.26559800  |
| C  | -6.37269400 | 1.13915000  | 0.53008900  |
| C  | -4.93745600 | -0.54760600 | 1.59311700  |
| C  | -5.51927600 | 2.87214500  | -0.88740800 |
| C  | -3.13283200 | 3.18283200  | -1.36212800 |
| C  | -3.35180900 | -3.63675800 | -1.65903500 |
| C  | -2.98950000 | -4.04648700 | -0.41402500 |
| H  | -7.19783100 | 0.68003200  | 1.08198300  |
| C  | -6.59763900 | 2.26272900  | -0.25636900 |
| C  | -5.48950300 | -1.80822500 | 1.28861600  |
| C  | -4.34990200 | -0.31702700 | 2.85780000  |
| H  | -5.66780000 | 3.78712300  | -1.46768200 |
| C  | -2.76209200 | 3.08640100  | -2.71278700 |

|    |             |             |             |
|----|-------------|-------------|-------------|
| C  | -2.54124100 | 4.16188100  | -0.53212700 |
| H  | -7.60327200 | 2.68017300  | -0.35145600 |
| C  | -5.43851600 | -2.82687300 | 2.24621200  |
| C  | -4.32878400 | -1.35615300 | 3.79484000  |
| C  | -1.77577800 | 3.94686700  | -3.21301200 |
| C  | -1.58564400 | 5.02373900  | -1.07099600 |
| H  | -5.86500900 | -3.80515300 | 2.00648100  |
| C  | -4.86990900 | -2.60288300 | 3.49584800  |
| H  | -3.89190600 | -1.17332300 | 4.78031200  |
| H  | -1.47374300 | 3.85924800  | -4.26039400 |
| C  | -1.19382300 | 4.91292700  | -2.40362200 |
| H  | -1.13335200 | 5.78512300  | -0.42942700 |
| H  | -0.43384800 | 5.58416600  | -2.81114400 |
| H  | -4.85164800 | -3.40142900 | 4.24201900  |
| H  | -3.73082500 | -4.19314600 | -2.51152700 |
| H  | -2.98266600 | -5.03534500 | 0.03543700  |
| C  | -3.79684700 | 1.03080600  | 3.22251800  |
| H  | -3.55927700 | 1.07919100  | 4.29426000  |
| H  | -2.87734500 | 1.25216100  | 2.65870600  |
| H  | -4.51067300 | 1.83269300  | 2.98256000  |
| C  | -6.15372800 | -2.06282300 | -0.03448100 |
| H  | -6.11217600 | -3.12923400 | -0.29856900 |
| H  | -7.21536900 | -1.76741900 | -0.00956700 |
| H  | -5.68699500 | -1.47769100 | -0.83800400 |
| C  | -2.91271200 | 4.25918400  | 0.91777100  |
| H  | -2.42051600 | 5.11796700  | 1.39531600  |
| H  | -4.00000300 | 4.35522000  | 1.05737200  |
| H  | -2.60323100 | 3.34537600  | 1.44877800  |
| C  | -3.40531600 | 2.09864200  | -3.64385900 |
| H  | -4.16055500 | 1.48949600  | -3.13174400 |
| H  | -3.90324700 | 2.61576200  | -4.47968900 |
| H  | -2.65168900 | 1.42808400  | -4.08691600 |
| C  | -2.03534300 | -2.93623000 | 1.60363300  |
| H  | -2.24271400 | -1.97321600 | 2.08213000  |
| H  | -2.51730500 | -3.73022200 | 2.18533300  |
| H  | -0.94908100 | -3.09404300 | 1.56194700  |
| C  | -3.40310000 | -1.43051900 | -2.83393100 |
| H  | -4.47447800 | -1.19679500 | -2.92046300 |
| H  | -2.83914000 | -0.49861400 | -2.70888200 |
| H  | -3.05944600 | -1.92961300 | -3.74951800 |
| Al | 2.71841000  | 0.32021500  | -0.84927900 |
| C  | 4.01955000  | -1.21436200 | -0.28776400 |
| C  | 2.72097700  | 1.37104500  | 1.01747300  |
| C  | 5.34081800  | -0.85036500 | 0.10264800  |
| C  | 3.82066800  | -2.59628400 | -0.54608100 |
| N  | 2.80203600  | 2.72265800  | 1.07281200  |
| N  | 2.62823100  | 0.99134100  | 2.31607400  |
| C  | 6.35076100  | -1.80187500 | 0.28513000  |
| C  | 5.72552200  | 0.58495900  | 0.28233800  |
| C  | 4.83735000  | -3.54222800 | -0.35403700 |
| C  | 2.53552000  | -3.12140700 | -1.09882900 |
| C  | 2.74942400  | 3.17722200  | 2.36801300  |
| C  | 2.85627800  | 3.60032700  | -0.07519800 |
| C  | 2.63298600  | 2.07875500  | 3.15971200  |
| C  | 2.49187800  | -0.37019000 | 2.77448500  |
| H  | 7.34819100  | -1.46761000 | 0.58716300  |
| C  | 6.10278900  | -3.15469600 | 0.07255000  |

|   |             |             |             |
|---|-------------|-------------|-------------|
| C | 5.89395900  | 1.13060700  | 1.57112500  |
| C | 5.98579300  | 1.37955300  | -0.85789600 |
| H | 4.63080800  | -4.59615700 | -0.56565000 |
| C | 1.64015300  | -3.82913300 | -0.27219300 |
| C | 2.26473800  | -2.98420900 | -2.47758300 |
| H | 2.80737800  | 4.23264300  | 2.61836600  |
| H | 2.85009800  | 2.96967500  | -0.97986800 |
| H | 1.97207800  | 4.25467500  | -0.08686400 |
| H | 3.77693300  | 4.19798100  | -0.05064400 |
| H | 2.56396500  | 1.98366100  | 4.23987600  |
| H | 1.43853600  | -0.60290000 | 2.98342500  |
| H | 2.86389900  | -1.03415800 | 1.98433400  |
| H | 3.08694500  | -0.51360200 | 3.68564500  |
| H | 6.89406300  | -3.89513400 | 0.21377500  |
| C | 6.21469000  | 2.48582200  | 1.70673000  |
| C | 5.79706800  | 0.27464200  | 2.80161400  |
| C | 6.31977500  | 2.72637600  | -0.68389000 |
| C | 5.95722600  | 0.78764900  | -2.23782600 |
| C | 0.46511800  | -4.34973200 | -0.82232200 |
| C | 1.95014800  | -4.04639100 | 1.18231600  |
| C | 1.07812000  | -3.51819300 | -2.99321500 |
| C | 3.22550700  | -2.27657300 | -3.38553800 |
| H | 6.32186300  | 2.91027300  | 2.70906900  |
| C | 6.41483400  | 3.28554600  | 0.58724500  |
| H | 5.38474900  | 0.84103700  | 3.65018100  |
| H | 5.18793200  | -0.62031800 | 2.63039900  |
| H | 6.79755700  | -0.07954300 | 3.10226400  |
| H | 6.51809800  | 3.34025300  | -1.56678400 |
| H | 4.92045300  | 0.55823400  | -2.54229200 |
| H | 6.37893300  | 1.48789500  | -2.97248200 |
| H | 6.52472600  | -0.15398900 | -2.27779400 |
| H | -0.22647100 | -4.90123800 | -0.17914700 |
| C | 0.17813100  | -4.19088200 | -2.17397200 |
| H | 2.28947500  | -3.11944400 | 1.66649900  |
| H | 1.07354300  | -4.42932400 | 1.72571200  |
| H | 2.76839000  | -4.77181500 | 1.31379000  |
| H | 0.86885200  | -3.40718700 | -4.06076900 |
| H | 3.19726300  | -1.18651800 | -3.19768100 |
| H | 4.26039800  | -2.60317700 | -3.20691000 |
| H | 2.97294200  | -2.44962300 | -4.44109900 |
| H | 6.67212400  | 4.34169100  | 0.70489300  |
| H | -0.74291600 | -4.60610100 | -2.59014400 |

## 22) Intermediate 11'

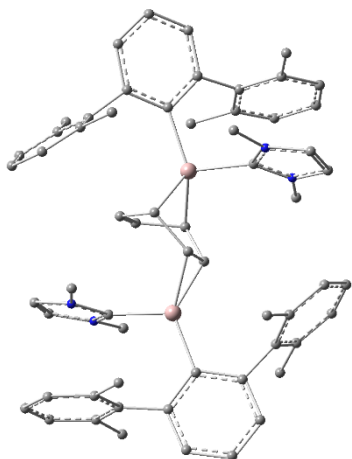

(Hydrogens are omitted for clarity)

Number of imaginary frequencies = 0

$E_{\text{total}} = -3023.823792$  a.u

$G_{\text{correction}} = 0.990375$  a.u

Cartesian coordinates:

|    |             |             |             |
|----|-------------|-------------|-------------|
| C  | -0.42517300 | 1.35678400  | 1.40443600  |
| C  | -0.67033400 | -0.11421500 | 1.43428300  |
| C  | 0.38450600  | -0.89756300 | 0.62131200  |
| C  | 0.50057200  | -0.33909000 | -0.82096900 |
| C  | -0.38848800 | 0.90774400  | -0.96898800 |
| C  | -0.25872100 | 1.87439800  | 0.15578200  |
| H  | -0.41490500 | 1.98488000  | 2.30317200  |
| H  | -0.83455900 | -0.51273700 | 2.44552200  |
| H  | 0.22050300  | -1.98421300 | 0.64299000  |
| H  | 0.30137400  | -1.08877300 | -1.60418100 |
| H  | -0.11469100 | 2.94316300  | -0.01123300 |
| H  | -0.32728400 | 1.38399000  | -1.95609800 |
| Al | -2.05479600 | 0.19623000  | -0.03917200 |
| C  | -3.79479200 | 1.24247600  | -0.05020400 |
| C  | -2.56238400 | -1.64050600 | -0.90511300 |
| C  | -5.00914400 | 0.59333600  | 0.29389400  |
| C  | -3.92168800 | 2.56552400  | -0.55048900 |
| N  | -2.85795400 | -1.85305100 | -2.20612700 |
| N  | -2.53974800 | -2.86846300 | -0.35247600 |
| C  | -6.25838500 | 1.19099800  | 0.07125700  |
| C  | -5.05771000 | -0.72059900 | 1.00553600  |
| C  | -5.17797700 | 3.14645100  | -0.77844400 |
| C  | -2.76594100 | 3.49404800  | -0.75610800 |
| C  | -3.02521200 | -3.19406400 | -2.46626500 |
| C  | -2.82717600 | -3.83750700 | -1.28390800 |
| H  | -7.16511700 | 0.65373700  | 0.36341700  |
| C  | -6.34977800 | 2.45731100  | -0.49104100 |
| C  | -5.61690900 | -1.85275300 | 0.37754400  |
| C  | -4.68108600 | -0.78070800 | 2.36631900  |
| H  | -5.22307700 | 4.16748000  | -1.16838800 |
| C  | -2.17342500 | 3.68065800  | -2.01657000 |
| C  | -2.35751800 | 4.28106300  | 0.34262900  |
| H  | -7.32462400 | 2.91700100  | -0.67245700 |

|    |             |             |             |
|----|-------------|-------------|-------------|
| C  | -5.79203900 | -3.02890700 | 1.11480400  |
| C  | -4.88362900 | -1.96985500 | 3.07466200  |
| C  | -1.14563700 | 4.62190000  | -2.15425500 |
| C  | -1.34239900 | 5.22383800  | 0.16736900  |
| H  | -6.22463400 | -3.90560800 | 0.62413200  |
| C  | -5.44103800 | -3.08665500 | 2.45982900  |
| H  | -4.61024400 | -2.00934300 | 4.13254600  |
| H  | -0.68100800 | 4.76183100  | -3.13449700 |
| C  | -0.72929800 | 5.38993900  | -1.07222100 |
| H  | -1.02525000 | 5.82953500  | 1.02061000  |
| H  | 0.06372500  | 6.13191200  | -1.19872700 |
| H  | -5.60060400 | -4.00502700 | 3.03075800  |
| H  | -3.27428500 | -3.57448100 | -3.45291000 |
| H  | -2.87279600 | -4.89262800 | -1.03220600 |
| C  | -4.11630100 | 0.41928500  | 3.07105300  |
| H  | -4.06291900 | 0.24624900  | 4.15495700  |
| H  | -3.10128600 | 0.65063700  | 2.71042100  |
| H  | -4.72702200 | 1.31542300  | 2.88576700  |
| C  | -6.05976100 | -1.81029100 | -1.05802500 |
| H  | -5.96865800 | -2.80154000 | -1.52571400 |
| H  | -7.11494100 | -1.50162900 | -1.13996400 |
| H  | -5.47567000 | -1.08697100 | -1.64135500 |
| C  | -2.98164000 | 4.08480100  | 1.69231800  |
| H  | -2.57710100 | 4.79827800  | 2.42389600  |
| H  | -4.07536600 | 4.20191000  | 1.65569100  |
| H  | -2.78565400 | 3.06376800  | 2.05419500  |
| C  | -2.60487200 | 2.87440100  | -3.20598600 |
| H  | -2.10383500 | 1.89429300  | -3.19728900 |
| H  | -3.68873600 | 2.69112600  | -3.20102800 |
| H  | -2.33884900 | 3.37825700  | -4.14618300 |
| C  | -2.26309400 | -3.13632100 | 1.04259400  |
| H  | -2.16135200 | -2.17607500 | 1.55961300  |
| H  | -3.09614300 | -3.69814300 | 1.48101900  |
| H  | -1.32363000 | -3.69584100 | 1.13179000  |
| C  | -2.94786300 | -0.79583000 | -3.18701500 |
| H  | -3.41514500 | 0.08430600  | -2.72757700 |
| H  | -1.94684500 | -0.51796800 | -3.54741700 |
| H  | -3.56435200 | -1.13057800 | -4.03087500 |
| Al | 2.24608400  | -0.34929400 | 0.13015100  |
| C  | 3.91336200  | -1.42951000 | -0.16146000 |
| C  | 2.60945600  | 1.51472000  | 0.86264100  |
| C  | 5.21854000  | -0.88156300 | -0.24041800 |
| C  | 3.81685100  | -2.83005200 | -0.34205000 |
| N  | 2.69293800  | 2.67577600  | 0.17831600  |
| N  | 2.63616200  | 1.87187200  | 2.16596900  |
| C  | 6.34318600  | -1.68578700 | -0.46459100 |
| C  | 5.48761600  | 0.58059000  | -0.11061100 |
| C  | 4.94655400  | -3.62541000 | -0.57334100 |
| C  | 2.51414500  | -3.55716900 | -0.30562500 |
| C  | 2.74401500  | 3.74735300  | 1.03678500  |
| C  | 2.52625200  | 2.79232200  | -1.25277900 |
| C  | 2.70940900  | 3.23989000  | 2.29735100  |
| C  | 2.41428700  | 0.95808800  | 3.26241000  |
| H  | 7.32964600  | -1.21501700 | -0.51418200 |
| C  | 6.21524800  | -3.05994900 | -0.63093700 |
| C  | 5.76330800  | 1.13317400  | 1.15483300  |
| C  | 5.55658300  | 1.37856100  | -1.26701600 |

|   |             |             |             |
|---|-------------|-------------|-------------|
| H | 4.81668400  | -4.70337600 | -0.70708800 |
| C | 2.08784800  | -4.15723700 | 0.89455000  |
| C | 1.77999500  | -3.72962500 | -1.49394000 |
| H | 2.80026200  | 4.77282000  | 0.68403200  |
| H | 2.38227200  | 1.78049000  | -1.65736700 |
| H | 1.62454100  | 3.38304100  | -1.46916100 |
| H | 3.41106900  | 3.25798000  | -1.70417200 |
| H | 2.73478700  | 3.73389000  | 3.26428900  |
| H | 1.58416500  | 1.32308500  | 3.88302200  |
| H | 2.12308100  | -0.01440700 | 2.83492200  |
| H | 3.31762600  | 0.84805400  | 3.87794000  |
| H | 7.09521800  | -3.68340600 | -0.80772400 |
| C | 6.07018300  | 2.49268200  | 1.25202400  |
| C | 5.75720300  | 0.25773700  | 2.37358600  |
| C | 5.89855500  | 2.72966100  | -1.13828000 |
| C | 5.27181700  | 0.78389000  | -2.61604600 |
| C | 0.95720000  | -4.97796400 | 0.87632500  |
| C | 2.83210900  | -3.90381600 | 2.17192300  |
| C | 0.64001000  | -4.53973000 | -1.47259000 |
| C | 2.22622500  | -3.06771700 | -2.76517700 |
| H | 6.26856000  | 2.92776000  | 2.23536800  |
| C | 6.14395700  | 3.28817800  | 0.11181800  |
| H | 5.80697500  | 0.85435600  | 3.29590500  |
| H | 4.86491000  | -0.38412800 | 2.40501300  |
| H | 6.62048600  | -0.42712200 | 2.36557500  |
| H | 5.97032700  | 3.34958900  | -2.03695600 |
| H | 5.29157000  | 1.55114500  | -3.40303900 |
| H | 6.00829900  | 0.00654900  | -2.87248200 |
| H | 4.28815200  | 0.28816300  | -2.63223500 |
| H | 0.63779600  | -5.46700400 | 1.80109200  |
| C | 0.24548300  | -5.18127600 | -0.30325000 |
| H | 2.81531200  | -2.82722200 | 2.40828000  |
| H | 2.38256400  | -4.45132700 | 3.01215200  |
| H | 3.89096100  | -4.19221100 | 2.09035400  |
| H | 0.06865600  | -4.68114300 | -2.39381300 |
| H | 2.25504400  | -1.97300900 | -2.64380400 |
| H | 3.24423900  | -3.38264200 | -3.04210900 |
| H | 1.54860500  | -3.30803900 | -3.59663000 |
| H | 6.40015700  | 4.34714500  | 0.19865900  |
| H | -0.62387100 | -5.84413300 | -0.30768800 |

### 23) Product 4'

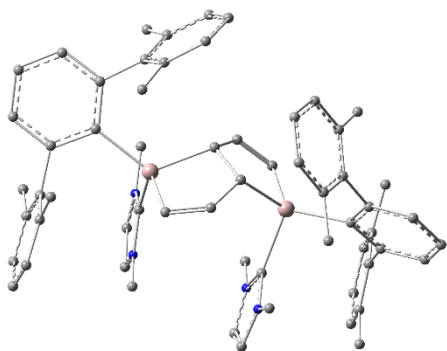

(Hydrogens are omitted for clarity)

Number of imaginary frequencies = 0

$E_{\text{total}} = -3023.871524$  a.u

$G_{\text{correction}} = 0.990698$  a.u

Cartesian coordinates:

|    |             |             |             |
|----|-------------|-------------|-------------|
| Al | 2.07896400  | 0.13253200  | -0.19936400 |
| C  | 1.30584100  | 0.18973200  | -2.00865800 |
| H  | 1.64459900  | -0.06569700 | -3.02138400 |
| C  | 0.07890000  | 0.76391900  | -1.88153100 |
| H  | -0.53722400 | 0.99054100  | -2.76909300 |
| C  | -0.50897000 | 1.15438400  | -0.58335500 |
| H  | -0.93744700 | 2.16426500  | -0.69632200 |
| N  | 1.74055500  | -2.96660000 | -0.11545800 |
| C  | 2.00089400  | -1.81811700 | 0.54419500  |
| N  | 2.22528700  | -2.20131100 | 1.82167800  |
| C  | 2.12699400  | -3.56584600 | 1.95877400  |
| C  | 1.82700600  | -4.05243200 | 0.72359000  |
| C  | 1.48545900  | -3.05967000 | -1.53847900 |
| H  | 2.40620600  | -3.34186900 | -2.06492300 |
| H  | 1.15564200  | -2.07162700 | -1.89044800 |
| H  | 0.69911900  | -3.80364300 | -1.71738800 |
| C  | 2.50305900  | -1.28497800 | 2.90520700  |
| H  | 3.26310000  | -1.71620100 | 3.57022600  |
| H  | 1.58630200  | -1.06680600 | 3.46976100  |
| H  | 2.88928300  | -0.34987800 | 2.48276200  |
| C  | 4.00443800  | 0.69090100  | 0.19519800  |
| C  | 4.33123900  | 1.89713400  | 0.86500900  |
| C  | 5.65740000  | 2.23259300  | 1.17191200  |
| H  | 5.85883400  | 3.17520500  | 1.68858500  |
| C  | 6.70543800  | 1.39340000  | 0.81383200  |
| H  | 7.73780300  | 1.66034200  | 1.05388300  |
| C  | 6.42207100  | 0.22176500  | 0.12192200  |
| H  | 7.23485200  | -0.43535800 | -0.20137800 |
| C  | 5.09956900  | -0.12430400 | -0.18768400 |
| C  | 3.29158900  | 2.90513300  | 1.23191000  |
| C  | 2.88031000  | 3.05926400  | 2.56861500  |
| C  | 1.90067000  | 4.01100000  | 2.87522400  |
| H  | 1.56105700  | 4.11286700  | 3.90977700  |
| C  | 1.35985900  | 4.82149500  | 1.88555200  |
| C  | 1.79268900  | 4.68599700  | 0.56965800  |
| H  | 1.36716700  | 5.31800900  | -0.21352500 |
| C  | 2.74857300  | 3.72939000  | 0.22173600  |
| C  | 3.46881000  | 2.23542500  | 3.68102400  |
| H  | 2.68790100  | 1.90903200  | 4.38518900  |
| H  | 4.20164200  | 2.82151700  | 4.26047900  |
| H  | 3.99930800  | 1.35189500  | 3.30387600  |
| C  | 3.13436800  | 3.55363100  | -1.21791000 |
| H  | 4.20983800  | 3.35839600  | -1.33552800 |
| H  | 2.86836100  | 4.44358800  | -1.80547600 |
| H  | 2.59733700  | 2.69535700  | -1.66002200 |
| C  | 4.93266100  | -1.36213700 | -1.00908700 |
| C  | 4.74108100  | -1.23584600 | -2.40252200 |
| C  | 4.69092200  | -2.39246600 | -3.18742900 |
| H  | 4.55418200  | -2.29458200 | -4.26774200 |
| C  | 4.83164800  | -3.65426700 | -2.61533300 |



|    |             |             |             |
|----|-------------|-------------|-------------|
| C  | 5.02862100  | -3.77190900 | -1.24268300 |
| H  | 5.15316500  | -4.76001100 | -0.79021900 |
| C  | 5.09755100  | -2.63487300 | -0.42884800 |
| C  | 4.66955000  | 0.11888000  | -3.04310400 |
| H  | 5.58825500  | 0.69193600  | -2.84160400 |
| H  | 3.83429000  | 0.70932200  | -2.64092700 |
| H  | 4.54227000  | 0.03480500  | -4.13128400 |
| C  | 5.40968500  | -2.78385300 | 1.03321900  |
| H  | 6.49738800  | -2.73021400 | 1.20595800  |
| H  | 5.06118900  | -3.75330900 | 1.41780300  |
| H  | 4.96204900  | -1.97776300 | 1.62841000  |
| C  | -1.30530700 | 0.18768600  | 2.00834000  |
| H  | -1.64397000 | -0.06870300 | 3.02085300  |
| C  | -0.07870100 | 0.76268400  | 1.88160400  |
| H  | 0.53731100  | 0.98909800  | 2.76930200  |
| C  | 0.50898300  | 1.15424000  | 0.58368200  |
| H  | 0.93706900  | 2.16421600  | 0.69723900  |
| Al | -2.07869400 | 0.13185800  | 0.19915600  |
| N  | -1.74084800 | -2.96709200 | 0.11223700  |
| C  | -2.00124100 | -1.81799000 | -0.54631200 |
| N  | -2.22592400 | -2.19997800 | -1.82409900 |
| C  | -2.12773000 | -3.56439200 | -1.96247900 |
| C  | -1.82761600 | -4.05214900 | -0.72777500 |
| C  | -1.48572700 | -3.06136300 | 1.53518700  |
| H  | -2.40713500 | -3.34126600 | 2.06172100  |
| H  | -1.15325900 | -2.07434900 | 1.88754700  |
| H  | -0.70143100 | -3.80758600 | 1.71362700  |
| C  | -2.50403100 | -1.28263300 | -2.90669200 |
| H  | -3.26517500 | -1.71268100 | -3.57122000 |
| H  | -1.58767900 | -1.06492100 | -3.47208500 |
| H  | -2.88899800 | -0.34749200 | -2.48323100 |
| C  | -4.00427900 | 0.69040100  | -0.19446400 |
| C  | -4.33143100 | 1.89632600  | -0.86461600 |
| C  | -5.65778200 | 2.23167700  | -1.17087700 |
| H  | -5.85949500 | 3.17406100  | -1.68785800 |
| C  | -6.70560700 | 1.39262400  | -0.81185800 |
| H  | -7.73810800 | 1.65946100  | -1.05144100 |
| C  | -6.42185100 | 0.22128800  | -0.11959300 |
| H  | -7.23445900 | -0.43567500 | 0.20446900  |
| C  | -5.09917400 | -0.12466100 | 0.18938200  |
| C  | -3.29201800 | 2.90430100  | -1.23229800 |
| C  | -2.88085300 | 3.05814200  | -2.56903100 |
| C  | -1.90180000 | 4.01042300  | -2.87604700 |
| H  | -1.56243800 | 4.11218500  | -3.91069900 |
| C  | -1.36134300 | 4.82153900  | -1.88676800 |
| C  | -1.79392600 | 4.68618200  | -0.57074200 |
| H  | -1.36867500 | 5.31868900  | 0.21218700  |
| C  | -2.74924800 | 3.72922100  | -0.22243900 |
| C  | -3.46799400 | 2.23325900  | -3.68143900 |
| H  | -2.68463100 | 1.89751200  | -4.37853400 |
| H  | -4.19200500 | 2.82220400  | -4.26897500 |
| H  | -4.00754500 | 1.35548100  | -3.30373900 |
| C  | -3.13477500 | 3.55370400  | 1.21731000  |
| H  | -4.21020200 | 3.35837100  | 1.33517200  |
| H  | -2.86874500 | 4.44379800  | 1.80465500  |
| H  | -2.59759100 | 2.69556800  | 1.65949400  |
| C  | -4.93185200 | -1.36217200 | 1.01120100  |

|   |             |             |             |
|---|-------------|-------------|-------------|
| C | -4.73970600 | -1.23536800 | 2.40450100  |
| C | -4.68948300 | -2.39168300 | 3.18986900  |
| H | -4.55226300 | -2.29338000 | 4.27008200  |
| C | -4.83076700 | -3.65368000 | 2.61835700  |
| C | -5.02821700 | -3.77184200 | 1.24581100  |
| H | -5.15311900 | -4.76010300 | 0.79379200  |
| C | -5.09710300 | -2.63512900 | 0.43152400  |
| C | -4.66765700 | 0.11960400  | 3.04448600  |
| H | -5.58675100 | 0.69237300  | 2.84392000  |
| H | -3.83301500 | 0.71003600  | 2.64102600  |
| H | -4.53900400 | 0.03598200  | 4.13253900  |
| C | -5.40954700 | -2.78461100 | -1.03042400 |
| H | -6.49720500 | -2.73000100 | -1.20311100 |
| H | -5.06199500 | -3.75458800 | -1.41454400 |
| H | -4.96116400 | -1.97927300 | -1.62607200 |
| H | 1.67624500  | -5.07038900 | 0.37540800  |
| H | 2.27824000  | -4.07163500 | 2.90835200  |
| H | -2.27917300 | -4.06930000 | -2.91249400 |
| H | -1.67685500 | -5.07044200 | -0.38057600 |
| H | -4.79468400 | -4.54749800 | 3.24668000  |
| H | -0.59823200 | 5.56144800  | -2.14084700 |
| H | 4.79559700  | -4.54833500 | -3.24330500 |
| H | 0.59623700  | 5.56099100  | 2.13929500  |

## 24) TS[7'-13']

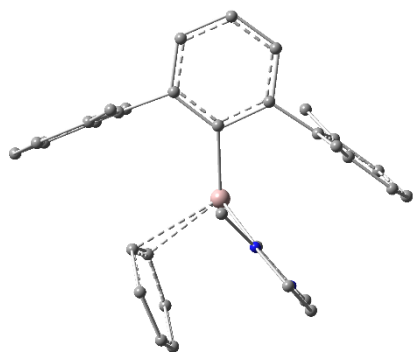

(Selected hydrogens are omitted for clarity)

Number of imaginary frequencies = 1 (108.4 cm<sup>-1</sup>)

E<sub>total</sub> = -1627.777402 a.u

G<sub>correction</sub> = 0.528755 a.u

Cartesian coordinates:

|    |             |            |             |
|----|-------------|------------|-------------|
| Al | -0.14898500 | 0.32380400 | -0.99605300 |
| C  | 1.64473200  | 2.19002100 | -0.14350700 |
| C  | 1.18458100  | 3.20266700 | 0.71058900  |
| C  | 0.33463700  | 4.20060100 | 0.26055000  |
| C  | -0.02229600 | 4.22250500 | -1.11342900 |
| C  | 0.42643300  | 3.25363600 | -1.97568900 |
| C  | 1.21263900  | 2.14733800 | -1.50568900 |
| H  | 2.39727200  | 1.48413900 | 0.20834200  |
| H  | 1.81883100  | 1.59914700 | -2.22999800 |
| H  | 0.16549800  | 3.29879600 | -3.03601900 |

|   |             |             |             |
|---|-------------|-------------|-------------|
| H | 1.54553600  | 3.22347900  | 1.74305800  |
| H | -0.00939000 | 4.98853800  | 0.93339900  |
| H | -0.63320000 | 5.04473600  | -1.49768300 |
| C | 0.42620500  | -1.38885000 | -0.05244900 |
| C | 1.72924800  | -1.89003200 | 0.19628400  |
| C | -0.64364200 | -2.31388900 | 0.10691800  |
| C | 1.93583300  | -3.21441500 | 0.60421100  |
| C | -0.42470100 | -3.63186400 | 0.51689800  |
| C | 0.86654300  | -4.08839600 | 0.77011800  |
| H | 2.95770000  | -3.56085100 | 0.78470500  |
| H | -1.27960800 | -4.30569600 | 0.62809500  |
| H | 1.03834500  | -5.12110800 | 1.08314500  |
| C | -1.32597000 | 1.29067200  | 0.42306400  |
| N | -1.27184900 | 1.36227000  | 1.77355100  |
| N | -2.43306200 | 1.99053400  | 0.08862800  |
| C | -2.32360900 | 2.09235000  | 2.27390900  |
| C | -0.20879600 | 0.81651600  | 2.58464100  |
| C | -3.06309000 | 2.48844400  | 1.20335000  |
| C | -2.90554600 | 2.18602400  | -1.26464900 |
| H | 0.48812600  | 1.60959400  | 2.88764000  |
| H | -0.62919400 | 0.33574000  | 3.47719200  |
| H | 0.33079400  | 0.07523900  | 1.98232900  |
| H | -2.20461200 | 1.66404800  | -1.93957700 |
| H | -3.90337100 | 1.74237000  | -1.38158500 |
| H | -2.92706900 | 3.25748700  | -1.50438500 |
| C | 2.92867000  | -1.02077400 | 0.03311200  |
| C | 3.38506200  | -0.68979200 | -1.26041600 |
| C | 3.60985300  | -0.53871700 | 1.17033000  |
| C | 4.48361500  | 0.16575200  | -1.39311100 |
| C | 4.70420500  | 0.31555900  | 0.99824100  |
| C | 5.13377500  | 0.67696500  | -0.27448100 |
| H | 4.83330900  | 0.43016600  | -2.39477200 |
| H | 5.21936400  | 0.70764400  | 1.87952900  |
| C | -2.04572400 | -1.88893100 | -0.20082700 |
| C | -2.49777500 | -1.91542100 | -1.54117100 |
| C | -2.92109300 | -1.49551700 | 0.83088200  |
| C | -3.78996600 | -1.46576900 | -1.82922400 |
| C | -4.20372700 | -1.03925200 | 0.50382200  |
| C | -4.63290200 | -1.01123200 | -0.81828800 |
| H | -4.13763000 | -1.48133400 | -2.86550300 |
| H | -4.87576100 | -0.71855500 | 1.30487800  |
| C | 3.18533900  | -0.92917100 | 2.55845200  |
| H | 3.58852200  | -1.91721500 | 2.83464000  |
| H | 3.54995600  | -0.20502500 | 3.30142900  |
| H | 2.09357600  | -1.01116200 | 2.64587000  |
| C | 2.71909000  | -1.25435200 | -2.48198900 |
| H | 3.31862200  | -1.06092800 | -3.38243000 |
| H | 2.56587000  | -2.33956000 | -2.38545600 |
| H | 1.71520900  | -0.81541800 | -2.63918400 |
| C | -2.52929100 | -1.61908900 | 2.27505500  |
| H | -2.97101200 | -0.81325000 | 2.88017500  |
| H | -2.89435000 | -2.57423600 | 2.68868600  |
| H | -1.44056300 | -1.61827200 | 2.40419000  |
| C | -1.63205500 | -2.47975200 | -2.63026500 |
| H | -0.69166700 | -1.91207400 | -2.72069800 |
| H | -1.36314600 | -3.52539700 | -2.41405500 |
| H | -2.14636200 | -2.44298300 | -3.60037000 |

|   |             |             |             |
|---|-------------|-------------|-------------|
| H | -5.63910500 | -0.65907200 | -1.06120800 |
| H | 5.98311100  | 1.35350700  | -0.39540100 |
| H | -2.45904000 | 2.26986400  | 3.33725500  |
| H | -3.97504800 | 3.07557300  | 1.14575000  |

## 25) Intermediate 13'

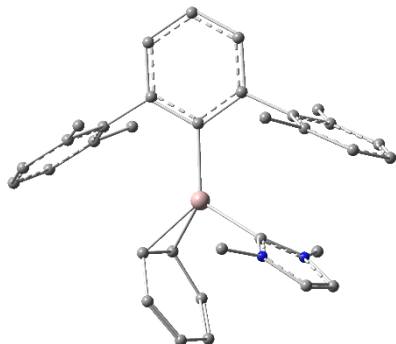

(Selected hydrogens are omitted for clarity)

Number of imaginary frequencies = 0

$E_{\text{total}} = -1627.794815 \text{ a.u.}$

$G_{\text{correction}} = 0.528884 \text{ a.u.}$

Cartesian coordinates:

|    |             |             |             |
|----|-------------|-------------|-------------|
| Al | 0.24664100  | 0.57122400  | -0.14649000 |
| C  | 1.35260300  | 2.18577800  | 0.24874900  |
| C  | 0.77406900  | 3.35924900  | 0.89605200  |
| C  | -0.12541600 | 4.17528100  | 0.29420300  |
| C  | -0.41856800 | 4.02171100  | -1.12726600 |
| C  | 0.19901300  | 3.06190900  | -1.85800800 |
| C  | 1.03809300  | 2.01883800  | -1.26963200 |
| H  | 2.38992300  | 1.97255300  | 0.53326600  |
| H  | 1.89464300  | 1.72756500  | -1.89105000 |
| H  | 0.07914800  | 3.05757800  | -2.94762400 |
| H  | 1.09818900  | 3.57918200  | 1.91999000  |
| H  | -0.54900300 | 5.02627200  | 0.83460100  |
| H  | -1.05430800 | 4.76319400  | -1.61968400 |
| C  | 0.67795400  | -1.36319800 | -0.00014800 |
| C  | 2.02967600  | -1.77898800 | 0.07042000  |
| C  | -0.30413300 | -2.38158300 | 0.02690900  |
| C  | 2.37242300  | -3.13176700 | 0.16007400  |
| C  | 0.04976200  | -3.73264100 | 0.12148600  |
| C  | 1.38619600  | -4.11361700 | 0.18664800  |
| H  | 3.42918400  | -3.40908000 | 0.21151700  |
| H  | -0.74024900 | -4.48918900 | 0.14027500  |
| H  | 1.65759400  | -5.16976200 | 0.25753300  |
| C  | -1.65220000 | 1.19543100  | 0.22462700  |
| N  | -2.14825000 | 1.60761900  | 1.41151600  |
| N  | -2.63098700 | 1.44950000  | -0.66894500 |
| C  | -3.41865600 | 2.11076000  | 1.26576800  |
| C  | -1.41781800 | 1.60700000  | 2.65762200  |
| C  | -3.72394600 | 2.01052900  | -0.05498700 |

|   |             |             |             |
|---|-------------|-------------|-------------|
| C | -2.51520500 | 1.26575100  | -2.09697500 |
| H | -1.36318700 | 2.62896900  | 3.05472800  |
| H | -1.89858200 | 0.94166700  | 3.38770300  |
| H | -0.39534700 | 1.26047600  | 2.45084300  |
| H | -1.53678000 | 0.81249400  | -2.30346400 |
| H | -3.31297000 | 0.60511400  | -2.45836900 |
| H | -2.55800400 | 2.24157400  | -2.59783100 |
| C | 3.12956400  | -0.77286100 | 0.05856700  |
| C | 3.66163600  | -0.33325100 | -1.16768700 |
| C | 3.62896300  | -0.27651500 | 1.27803600  |
| C | 4.68656400  | 0.61848400  | -1.15639000 |
| C | 4.66090400  | 0.66535900  | 1.25259700  |
| C | 5.18458700  | 1.11508100  | 0.04374900  |
| H | 5.09725300  | 0.97145900  | -2.10607500 |
| H | 5.04838000  | 1.05896100  | 2.19616000  |
| C | -1.75820000 | -2.05874500 | -0.04686900 |
| C | -2.40504300 | -2.03220100 | -1.29592500 |
| C | -2.48270800 | -1.82782300 | 1.13867400  |
| C | -3.77923500 | -1.77092200 | -1.34082600 |
| C | -3.84834200 | -1.54287100 | 1.05613000  |
| C | -4.49619400 | -1.51725100 | -0.17591200 |
| H | -4.29048100 | -1.76911900 | -2.30807900 |
| H | -4.41201100 | -1.35175700 | 1.97344400  |
| C | 3.03159000  | -0.72241500 | 2.58062400  |
| H | 3.07397600  | -1.81605800 | 2.69549700  |
| H | 3.54787100  | -0.26105600 | 3.43395700  |
| H | 1.96601500  | -0.44391000 | 2.62860800  |
| C | 3.13214300  | -0.87385300 | -2.46507300 |
| H | 3.65718700  | -0.43091600 | -3.32277800 |
| H | 3.24250400  | -1.96803000 | -2.51675500 |
| H | 2.05643500  | -0.66136800 | -2.57046300 |
| C | -1.79385300 | -1.91342700 | 2.46963800  |
| H | -2.45658500 | -1.59179000 | 3.28572600  |
| H | -1.47365500 | -2.94650000 | 2.67852900  |
| H | -0.87684600 | -1.30611600 | 2.49067100  |
| C | -1.62896200 | -2.28728900 | -2.55577600 |
| H | -0.75539400 | -1.61978100 | -2.62714600 |
| H | -1.22858500 | -3.31280000 | -2.57600600 |
| H | -2.25523700 | -2.14471900 | -3.44773200 |
| H | -4.61963500 | 2.28988100  | -0.60192200 |
| H | -3.99362800 | 2.49635500  | 2.10266700  |
| H | -5.56735800 | -1.30635000 | -0.22632500 |
| H | 5.98430500  | 1.85962300  | 0.03737100  |

## 26) TS[13'-10']

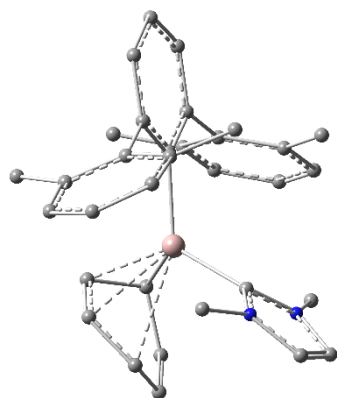

(Selected hydrogens are omitted for clarity)

Number of imaginary frequencies = 1 (131.3 cm<sup>-1</sup>)

E<sub>total</sub> = -1627.771007 a.u

G<sub>correction</sub> = 0.529381 a.u

Cartesian coordinates:

|    |             |             |             |
|----|-------------|-------------|-------------|
| Al | 0.13527000  | 0.52822700  | 0.58395200  |
| C  | 0.25905000  | 0.48198600  | 2.70118700  |
| C  | -0.89890200 | 1.26784800  | 2.56543800  |
| C  | -0.78388300 | 2.58038600  | 2.04607900  |
| C  | 0.48915800  | 3.25764900  | 2.22278300  |
| C  | 1.61512800  | 2.51007100  | 2.27747900  |
| C  | 1.45950600  | 1.05738800  | 1.95795100  |
| H  | 0.29460100  | -0.39127500 | 3.35985500  |
| H  | 2.37059100  | 0.46155300  | 2.05905200  |
| H  | 2.57662700  | 2.92112100  | 2.60181900  |
| H  | -1.86783700 | 0.88964900  | 2.91363600  |
| H  | -1.69327300 | 3.16382600  | 1.88556900  |
| H  | 0.49905900  | 4.33578800  | 2.41619000  |
| C  | 0.09865700  | -1.35771800 | -0.11653300 |
| C  | 1.31615600  | -2.02852100 | -0.39153600 |
| C  | -1.08358500 | -2.12140000 | -0.25779800 |
| C  | 1.34492600  | -3.38507400 | -0.73915500 |
| C  | -1.04371200 | -3.47978100 | -0.60035600 |
| C  | 0.16835300  | -4.11912200 | -0.83129500 |
| H  | 2.30849400  | -3.86008800 | -0.94469300 |
| H  | -1.98338300 | -4.03260900 | -0.68977800 |
| H  | 0.19462700  | -5.17938600 | -1.09491300 |
| C  | -0.41323600 | 1.96832100  | -0.77134000 |
| N  | -1.60692000 | 2.54426300  | -1.06109000 |
| N  | 0.51263600  | 2.82046700  | -1.27993500 |
| C  | -1.42920100 | 3.74573000  | -1.70684100 |
| C  | -0.09002400 | 3.91798800  | -1.85223700 |
| C  | 2.62807800  | -1.31767900 | -0.37380700 |
| C  | 3.02962200  | -0.59026900 | -1.51032900 |
| C  | 3.48272800  | -1.43683800 | 0.73869200  |
| C  | 4.27708300  | 0.04224800  | -1.50391700 |
| C  | 4.71772000  | -0.78355100 | 0.71535900  |
| C  | 5.11355800  | -0.04400900 | -0.39547500 |
| H  | 4.59613600  | 0.60472400  | -2.38620700 |
| H  | 5.37632000  | -0.85704000 | 1.58492800  |

|   |             |             |             |
|---|-------------|-------------|-------------|
| C | -2.44720600 | -1.53514000 | -0.09697400 |
| C | -3.15679400 | -1.14170600 | -1.25128800 |
| C | -3.06202000 | -1.48799500 | 1.16990000  |
| C | -4.47935500 | -0.70880100 | -1.12035800 |
| C | -4.37121900 | -1.00166800 | 1.26852800  |
| C | -5.08097800 | -0.62490800 | 0.13235300  |
| H | -5.03652500 | -0.41685800 | -2.01513700 |
| H | -4.84643800 | -0.94973200 | 2.25178200  |
| C | -2.35030200 | -2.01694200 | 2.37938400  |
| H | -2.88210300 | -1.75397200 | 3.30436800  |
| H | -2.27487100 | -3.11528800 | 2.32850500  |
| H | -1.32214300 | -1.63478900 | 2.43925200  |
| C | -2.49162200 | -1.16563100 | -2.59717800 |
| H | -2.16671900 | -2.18064600 | -2.87146700 |
| H | -3.16611400 | -0.79343600 | -3.38106700 |
| H | -1.58141600 | -0.54453400 | -2.59406700 |
| C | 3.06441400  | -2.24276400 | 1.93448800  |
| H | 2.05473800  | -1.96228400 | 2.26985000  |
| H | 3.02507000  | -3.31789800 | 1.69782800  |
| H | 3.76194300  | -2.10280900 | 2.77192800  |
| C | 2.13706200  | -0.50960600 | -2.71687800 |
| H | 2.61846300  | 0.05052700  | -3.53126900 |
| H | 1.88405500  | -1.51371000 | -3.09092400 |
| H | 1.17562200  | -0.02541300 | -2.48178300 |
| C | -2.88146100 | 2.09384200  | -0.55915700 |
| H | -3.28063000 | 2.82318300  | 0.16008800  |
| H | -3.59423700 | 1.95539100  | -1.38190500 |
| H | -2.75298100 | 1.13501300  | -0.04712900 |
| C | 1.94474700  | 2.64229200  | -1.18530100 |
| H | 2.36131900  | 2.27787900  | -2.13461100 |
| H | 2.41371200  | 3.59638500  | -0.91405400 |
| H | 2.15560100  | 1.91169400  | -0.39030500 |
| H | -2.26381600 | 4.37455100  | -2.00444700 |
| H | 0.47988000  | 4.72195400  | -2.30936100 |
| H | 6.08333700  | 0.45958100  | -0.40036700 |
| H | -6.11091400 | -0.27087300 | 0.22342200  |

## 27) TS[13'-14']

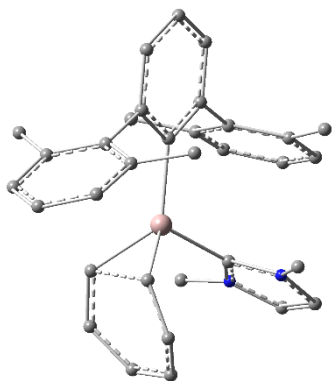

(Selected hydrogens are omitted for clarity)

Number of imaginary frequencies = 1 (402.4 cm<sup>-1</sup>)

$E_{\text{total}} = -1627.769026 \text{ a.u}$

$G_{\text{correction}} = 0.525884 \text{ a.u}$

Cartesian coordinates:

|    |             |             |             |
|----|-------------|-------------|-------------|
| Al | -0.28793600 | 0.66243100  | 0.22836700  |
| C  | -1.44210500 | 2.09935700  | -0.39609600 |
| C  | -0.94766000 | 3.36182000  | -0.77375100 |
| C  | 0.08922300  | 4.06725100  | -0.17029700 |
| C  | 0.43887100  | 3.91378400  | 1.19308400  |
| C  | -0.18555700 | 3.01751900  | 2.05350400  |
| C  | -0.83364000 | 1.81886100  | 1.69221700  |
| H  | -2.50753500 | 1.93675700  | -0.61210200 |
| H  | -1.63620100 | 1.51246000  | 2.38147900  |
| H  | -0.25230900 | 3.33288700  | 3.10494800  |
| H  | -1.49932900 | 3.90554100  | -1.55511200 |
| H  | 0.43890600  | 4.98098300  | -0.66349500 |
| H  | 1.01728300  | 4.73023200  | 1.64097700  |
| C  | -0.63540200 | -1.29863500 | 0.00201100  |
| C  | -1.96557800 | -1.76002200 | -0.14739100 |
| C  | 0.38438400  | -2.27774700 | -0.03714900 |
| C  | -2.25218800 | -3.11648900 | -0.33978300 |
| C  | 0.08753200  | -3.63286800 | -0.23569900 |
| C  | -1.22771300 | -4.05575800 | -0.39077600 |
| H  | -3.29469000 | -3.42949500 | -0.44651000 |
| H  | 0.90519500  | -4.35912200 | -0.25720000 |
| H  | -1.45378200 | -5.11428400 | -0.54205400 |
| C  | 1.58518700  | 1.22530600  | -0.38042500 |
| N  | 1.92844000  | 1.47864000  | -1.66141400 |
| N  | 2.67662600  | 1.54072500  | 0.34437500  |
| C  | 3.21705300  | 1.95308900  | -1.74022100 |
| C  | 3.69072000  | 1.98987100  | -0.46692800 |
| C  | 1.82473200  | -1.94082500 | 0.16425200  |
| C  | 2.67793900  | -1.79437600 | -0.94672700 |
| C  | 2.33686600  | -1.85460900 | 1.47323700  |
| C  | 4.03643500  | -1.54356200 | -0.73303700 |
| C  | 3.70762000  | -1.63857700 | 1.65033300  |
| C  | 4.55330800  | -1.47649300 | 0.55732400  |
| H  | 4.69820600  | -1.41566900 | -1.59396500 |
| H  | 4.11223200  | -1.59536400 | 2.66563200  |
| C  | -3.11692500 | -0.81369000 | -0.08223400 |
| C  | -3.64959900 | -0.45861100 | 1.17134500  |
| C  | -3.67311700 | -0.30061000 | -1.26894800 |
| C  | -4.72669900 | 0.43191300  | 1.21964900  |
| C  | -4.75992300 | 0.57390600  | -1.18455300 |
| C  | -5.28105300 | 0.94451600  | 0.05158900  |
| H  | -5.13653600 | 0.72032100  | 2.19119200  |
| H  | -5.19120200 | 0.97988300  | -2.10356900 |
| C  | 2.14297700  | -1.93529500 | -2.34228500 |
| H  | 2.83263500  | -1.49883600 | -3.07925600 |
| H  | 2.00117900  | -2.99656000 | -2.60422500 |
| H  | 1.15690200  | -1.46264600 | -2.44813000 |
| C  | 1.42709400  | -2.00134700 | 2.65921700  |
| H  | 0.87125800  | -2.95060700 | 2.62227500  |
| H  | 1.99168200  | -1.96296700 | 3.60114500  |
| H  | 0.66585000  | -1.20405800 | 2.68063000  |
| C  | -3.07131100 | -0.64176100 | -2.60053400 |



|   |             |             |             |
|---|-------------|-------------|-------------|
| H | -2.98618300 | -1.72857200 | -2.74737100 |
| H | -3.66361800 | -0.22149200 | -3.42517600 |
| H | -2.04916000 | -0.23471400 | -2.67234900 |
| C | -3.08415500 | -1.04242100 | 2.43465000  |
| H | -3.19104700 | -2.13861300 | 2.44593800  |
| H | -2.00771500 | -0.83515000 | 2.52897000  |
| H | -3.59236500 | -0.63656500 | 3.32028400  |
| C | 2.75668900  | 1.52294000  | 1.78831900  |
| H | 1.86580300  | 1.02480100  | 2.18422100  |
| H | 3.65607000  | 0.98022300  | 2.10210500  |
| H | 2.76421700  | 2.55300100  | 2.16799300  |
| C | 1.02737600  | 1.39805200  | -2.78869900 |
| H | 1.54618800  | 0.95951100  | -3.65106700 |
| H | 0.16971700  | 0.77118200  | -2.51880400 |
| H | 0.64538300  | 2.39880500  | -3.03468000 |
| H | 5.62124800  | -1.30187700 | 0.71136100  |
| H | -6.12315500 | 1.63873200  | 0.10459700  |
| H | 4.65872600  | 2.28884400  | -0.07576500 |
| H | 3.68557000  | 2.21831400  | -2.68360300 |

## 28) Intermediate 14'

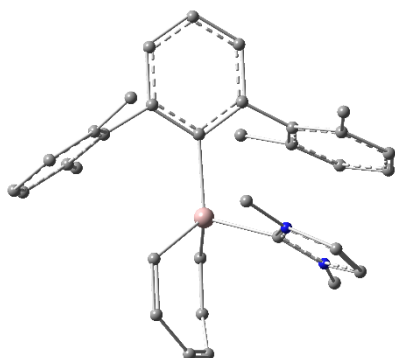

(Hydrogens are omitted for clarity)

Number of imaginary frequencies = 0

$E_{\text{total}} = -1627.798660$  a.u

$G_{\text{correction}} = 0.527542$  a.u

Cartesian coordinates:

|    |             |            |             |
|----|-------------|------------|-------------|
| Al | 0.13980900  | 0.70874200 | -0.48167000 |
| C  | 1.54068200  | 2.05162200 | -0.08081500 |
| C  | 1.33265000  | 3.37677600 | -0.28115500 |
| C  | 0.19140300  | 4.05756200 | -0.87227300 |
| C  | -0.67506800 | 3.68990100 | -1.85769400 |
| C  | -0.78595700 | 2.47120200 | -2.64336200 |
| C  | -0.52023800 | 1.19133000 | -2.28056800 |
| H  | 2.52969300  | 1.81926400 | 0.33643000  |
| H  | -0.66819200 | 0.46743900 | -3.09433000 |
| H  | -1.18257100 | 2.66306700 | -3.65363900 |
| H  | 2.11013200  | 4.08719000 | 0.04462300  |
| H  | 0.08525000  | 5.09990700 | -0.54457500 |
| H  | -1.34870000 | 4.49053500 | -2.19133500 |

|   |             |             |             |
|---|-------------|-------------|-------------|
| C | 0.52875600  | -1.25034600 | -0.11734700 |
| C | 1.84378500  | -1.75131900 | 0.04903300  |
| C | -0.51902300 | -2.20055800 | -0.04124700 |
| C | 2.08545600  | -3.11198300 | 0.28293000  |
| C | -0.26841200 | -3.55691400 | 0.20136100  |
| C | 1.03385200  | -4.01676200 | 0.36484600  |
| H | 3.11709400  | -3.45754300 | 0.39352000  |
| H | -1.10914500 | -4.25525000 | 0.24932100  |
| H | 1.22802600  | -5.07700900 | 0.54594600  |
| C | -1.25384300 | 1.31314300  | 0.94353500  |
| N | -0.93199300 | 1.45291100  | 2.24970200  |
| N | -2.51450300 | 1.78195800  | 0.84946700  |
| C | -1.97097600 | 2.00244000  | 2.96284900  |
| C | 0.35753900  | 1.11105200  | 2.80976000  |
| C | -2.97712800 | 2.21069900  | 2.07171900  |
| C | -3.28593700 | 1.85865100  | -0.37300100 |
| H | 0.79940900  | 0.29638400  | 2.22347300  |
| H | 1.03736300  | 1.97325900  | 2.76867200  |
| H | 0.22848700  | 0.77665100  | 3.84730500  |
| H | -3.17195100 | 2.85200300  | -0.82872300 |
| H | -2.91935200 | 1.10483400  | -1.07636700 |
| H | -4.33976000 | 1.65868400  | -0.14619700 |
| C | 3.03237100  | -0.85150400 | -0.02521900 |
| C | 3.44699700  | -0.33070100 | -1.26771200 |
| C | 3.74227300  | -0.53326200 | 1.15041900  |
| C | 4.55204800  | 0.52485500  | -1.30890000 |
| C | 4.83473800  | 0.33652500  | 1.07202600  |
| C | 5.23832900  | 0.86644700  | -0.14904200 |
| H | 4.87018000  | 0.93427000  | -2.27128500 |
| H | 5.37492100  | 0.59871600  | 1.98616200  |
| C | -1.94781100 | -1.81966800 | -0.25817200 |
| C | -2.79323800 | -1.57599300 | 0.84138200  |
| C | -2.46429800 | -1.80468600 | -1.57041500 |
| C | -4.14455300 | -1.29486500 | 0.61282700  |
| C | -3.81968500 | -1.51573500 | -1.76327000 |
| C | -4.65712100 | -1.26496000 | -0.68046500 |
| H | -4.80112000 | -1.10479500 | 1.46685000  |
| H | -4.22173400 | -1.50293500 | -2.77991800 |
| C | 2.71519700  | -0.65440500 | -2.53821700 |
| H | 2.31103700  | -1.67627300 | -2.53007400 |
| H | 1.86512500  | 0.03369900  | -2.68872500 |
| H | 3.37723400  | -0.54266800 | -3.40861400 |
| C | 3.36088300  | -1.11782400 | 2.48296900  |
| H | 3.84232000  | -2.09728500 | 2.64021000  |
| H | 3.67971100  | -0.46187800 | 3.30647400  |
| H | 2.27959300  | -1.29332900 | 2.56547500  |
| C | -1.59471000 | -2.17451000 | -2.73668700 |
| H | -1.43378300 | -3.26493000 | -2.76293700 |
| H | -2.05606200 | -1.87649700 | -3.68853800 |
| H | -0.59972200 | -1.71613200 | -2.66561300 |
| C | -2.27052300 | -1.66638900 | 2.24634000  |
| H | -2.89079400 | -1.08101900 | 2.94059500  |
| H | -2.27023300 | -2.71218900 | 2.59588300  |
| H | -1.23189200 | -1.31718100 | 2.31340800  |
| H | 6.09244800  | 1.54632300  | -0.19689500 |
| H | -5.71555100 | -1.04765700 | -0.84612900 |
| H | -1.91465400 | 2.18868500  | 4.03164800  |

H                                    -3.97548200            2.61700100            2.20681300

**29) Intermediate 15'**

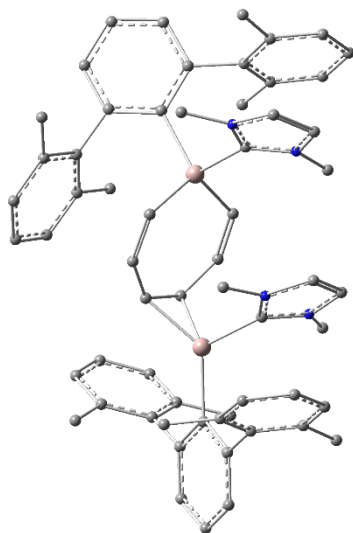

(Hydrogens are omitted for clarity)

Number of imaginary frequencies = 0

$E_{\text{total}} = -3023.828469$  a.u

$G_{\text{correction}} = 0.986062$  a.u

Cartesian coordinates:

|    |             |             |             |
|----|-------------|-------------|-------------|
| Al | -2.45289400 | 0.13545400  | -0.05629800 |
| C  | 1.06177800  | 0.46380500  | 1.74336800  |
| H  | 1.48699300  | 0.38416400  | 2.75636500  |
| C  | -0.16326500 | 1.04393500  | 1.75418700  |
| H  | -0.58455000 | 1.33585700  | 2.73139400  |
| C  | -1.09948300 | 1.39167600  | 0.68651200  |
| H  | -1.64227800 | 2.30949500  | 0.94747100  |
| N  | -1.24321000 | -2.55556100 | 0.82617400  |
| C  | -1.74168300 | -1.76600200 | -0.14763200 |
| N  | -1.68073800 | -2.51654300 | -1.27154500 |
| C  | -1.16506800 | -3.76152000 | -1.00375800 |
| C  | -0.88360800 | -3.78329700 | 0.32651700  |
| C  | 1.13616400  | 0.00889300  | -1.51868500 |
| H  | 1.59502300  | -0.33528100 | -2.45848900 |
| C  | -0.03880400 | 0.67333000  | -1.72152500 |
| H  | -0.37600500 | 0.79625700  | -2.76679200 |
| C  | -1.00331200 | 1.29419600  | -0.82827900 |
| H  | -1.48160700 | 2.15891200  | -1.30236100 |
| Al | 2.14929100  | 0.04020400  | 0.16239900  |
| N  | 3.31973200  | -2.31140800 | 1.78670200  |
| C  | 2.76893100  | -1.91850900 | 0.61415700  |
| N  | 2.60746400  | -3.06474600 | -0.08189600 |
| C  | 3.05888200  | -4.15164200 | 0.63063900  |
| C  | 3.50538300  | -3.67438400 | 1.82341700  |
| C  | -4.43031100 | 0.27914200  | -0.25000600 |

|   |             |             |             |
|---|-------------|-------------|-------------|
| C | -5.31297400 | -0.74491200 | 0.16707500  |
| C | -5.01658300 | 1.44316300  | -0.80549300 |
| C | -6.69851600 | -0.62300600 | 0.00162300  |
| C | -6.40194200 | 1.55629700  | -0.96048600 |
| C | -7.24643500 | 0.52223000  | -0.56629900 |
| H | -7.34930700 | -1.43485800 | 0.33915300  |
| H | -6.81549600 | 2.47227600  | -1.39203300 |
| H | -8.32841900 | 0.61442000  | -0.68919400 |
| C | 3.89974200  | 1.10591700  | 0.10837200  |
| C | 5.07885400  | 0.64380700  | -0.52813700 |
| C | 3.98810200  | 2.37886400  | 0.73155300  |
| C | 6.27796300  | 1.36877500  | -0.48594900 |
| C | 5.18997000  | 3.10085900  | 0.75757200  |
| C | 6.34159700  | 2.59386600  | 0.16763900  |
| H | 7.16167900  | 0.96967300  | -0.99307300 |
| H | 5.20662000  | 4.08355500  | 1.23792300  |
| H | 7.27575300  | 3.16090600  | 0.19453200  |
| C | -4.16482000 | 2.59644600  | -1.21721000 |
| C | -3.79384700 | 3.55847400  | -0.25874100 |
| C | -3.73446200 | 2.71215700  | -2.55268800 |
| C | -2.96957000 | 4.61875000  | -0.65037000 |
| C | -2.91669500 | 3.78708900  | -2.91066800 |
| C | -2.52984800 | 4.73287900  | -1.96521000 |
| H | -2.67006100 | 5.36282200  | 0.09255100  |
| H | -2.56807900 | 3.87290600  | -3.94321200 |
| C | -4.81574700 | -1.97934000 | 0.84310400  |
| C | -4.71216000 | -3.18724100 | 0.12509000  |
| C | -4.51459700 | -1.94095100 | 2.21963400  |
| C | -4.28740500 | -4.34104400 | 0.79032300  |
| C | -4.11630800 | -3.12015000 | 2.85812300  |
| C | -3.99681900 | -4.31227100 | 2.15084100  |
| H | -4.19531900 | -5.27643000 | 0.23151000  |
| H | -3.89814400 | -3.09621300 | 3.92951000  |
| C | 5.10622400  | -0.59298800 | -1.36830400 |
| C | 5.69413600  | -1.78114700 | -0.89487200 |
| C | 4.65038900  | -0.51040100 | -2.70292600 |
| C | 5.77434200  | -2.89235400 | -1.74343100 |
| C | 4.76255100  | -1.63327300 | -3.52946700 |
| C | 5.31614900  | -2.82063100 | -3.05526200 |
| H | 6.22496200  | -3.81679600 | -1.37054800 |
| H | 4.42070600  | -1.56544800 | -4.56592300 |
| C | 2.79864600  | 3.05262900  | 1.33623100  |
| C | 1.83057800  | 3.63572600  | 0.49496100  |
| C | 2.67365600  | 3.14911700  | 2.73573200  |
| C | 0.72173700  | 4.26041000  | 1.07248700  |
| C | 1.55366800  | 3.78177000  | 3.27819100  |
| C | 0.57442400  | 4.32566200  | 2.45285900  |
| H | -0.04230500 | 4.68865100  | 0.41848000  |
| H | 1.44553100  | 3.83691700  | 4.36521900  |
| C | -4.27093400 | 3.44711900  | 1.16117800  |
| H | -3.87560000 | 4.26721100  | 1.77638100  |
| H | -5.37051800 | 3.46958400  | 1.21534400  |
| H | -3.95546400 | 2.49439900  | 1.61394100  |
| C | -4.11430600 | 1.67155900  | -3.56498500 |
| H | -5.20648200 | 1.57310000  | -3.65824300 |
| H | -3.69912800 | 1.90794800  | -4.55448200 |
| H | -3.73900200 | 0.68132900  | -3.26125000 |

|   |             |             |             |
|---|-------------|-------------|-------------|
| C | -4.62378200 | -0.65816100 | 2.99288400  |
| H | -5.60317700 | -0.18041500 | 2.84067600  |
| H | -4.47830300 | -0.82922500 | 4.06850400  |
| H | -3.86976700 | 0.07482300  | 2.65696000  |
| C | -5.07708900 | -3.24425700 | -1.33033700 |
| H | -4.62879500 | -4.12206700 | -1.81862800 |
| H | -6.16935200 | -3.31315700 | -1.46183800 |
| H | -4.76362300 | -2.33526200 | -1.86193200 |
| C | -1.02374800 | -2.14858400 | 2.19735000  |
| H | -1.73768200 | -1.35660300 | 2.44896900  |
| H | -1.18299000 | -3.00776200 | 2.85929000  |
| H | -0.01467800 | -1.72284900 | 2.29958300  |
| C | -1.98909600 | -2.03593400 | -2.59940400 |
| H | -2.60673000 | -2.76844200 | -3.13481000 |
| H | -2.53541400 | -1.08844300 | -2.50986500 |
| H | -1.05861600 | -1.83887800 | -3.14986200 |
| C | 3.71135200  | 2.55403200  | 3.64425800  |
| H | 4.67253600  | 3.08742100  | 3.57675100  |
| H | 3.38096200  | 2.58137200  | 4.69253700  |
| H | 3.92371800  | 1.50864400  | 3.37531800  |
| C | 1.96671200  | 3.58973500  | -0.99908200 |
| H | 2.98787600  | 3.84541700  | -1.31954700 |
| H | 1.74709100  | 2.58147200  | -1.38599200 |
| H | 1.26050500  | 4.28455200  | -1.47509900 |
| C | 6.29643400  | -1.85057000 | 0.47940300  |
| H | 6.22510600  | -2.86617100 | 0.89626100  |
| H | 7.36543800  | -1.58140800 | 0.44632700  |
| H | 5.81935900  | -1.14034200 | 1.16577700  |
| C | 4.12361200  | 0.78501300  | -3.24662700 |
| H | 3.80971600  | 0.67614600  | -4.29423900 |
| H | 3.26638600  | 1.14699500  | -2.66091500 |
| H | 4.89540100  | 1.56886100  | -3.19233600 |
| C | 2.13864000  | -3.13129700 | -1.44994000 |
| H | 1.42345500  | -2.31331000 | -1.61181300 |
| H | 2.98477700  | -3.01170000 | -2.13926700 |
| H | 1.65395500  | -4.10093900 | -1.61623800 |
| C | 3.66459300  | -1.41270700 | 2.86599400  |
| H | 4.59522000  | -1.75003200 | 3.34067300  |
| H | 3.81569500  | -0.40846100 | 2.45180100  |
| H | 2.86027000  | -1.36935300 | 3.61358400  |
| H | -3.68256700 | -5.22506300 | 2.66368700  |
| H | -1.87941900 | 5.56180600  | -2.25459000 |
| H | -0.46837200 | -4.56544500 | 0.95509000  |
| H | -1.04600800 | -4.52062700 | -1.77143100 |
| H | 3.94000200  | -4.18409700 | 2.67883400  |
| H | 3.03670400  | -5.16151300 | 0.23073300  |
| H | 5.39883100  | -3.68910600 | -3.71405900 |
| H | -0.30484000 | 4.80758400  | 2.88857100  |

### 30) Intermediate 12'

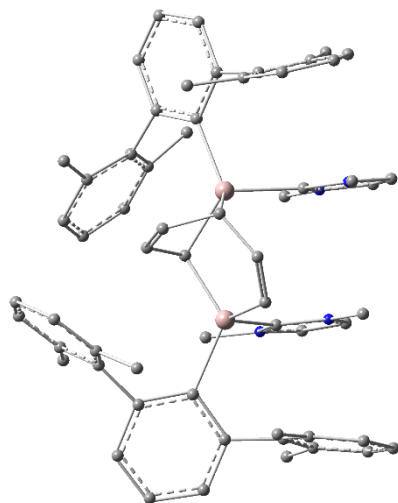

(Hydrogens are omitted for clarity)

Number of imaginary frequencies = 0

$E_{\text{total}} = -3023.868616 \text{ a.u}$

$G_{\text{correction}} = 0.996280 \text{ a.u}$

Cartesian coordinates:

|    |             |             |             |
|----|-------------|-------------|-------------|
| Al | -1.70357200 | -0.04949600 | -0.33861700 |
| C  | 0.00373200  | 0.94025900  | 0.05462600  |
| H  | 0.08346300  | 1.52214800  | 0.98486000  |
| C  | -0.23223700 | 1.82521600  | -1.12183600 |
| H  | 0.05248100  | 2.87966600  | -1.07245000 |
| C  | -0.79792200 | 1.34992000  | -2.25886600 |
| H  | -0.94029600 | 2.00995300  | -3.12299600 |
| N  | -1.68811300 | -2.31036600 | 1.73649600  |
| C  | -1.79575800 | -2.00419600 | 0.42396100  |
| N  | -2.03839100 | -3.18921000 | -0.17938400 |
| C  | -2.09748000 | -4.21163700 | 0.73759700  |
| C  | -1.87475400 | -3.65450200 | 1.95861600  |
| C  | 0.99727800  | -1.30321400 | -1.95019000 |
| H  | 1.58950000  | -2.13604400 | -2.35819800 |
| C  | -0.18753600 | -1.11773300 | -2.58961600 |
| H  | -0.44700100 | -1.81765500 | -3.40327900 |
| C  | -1.23942700 | -0.09491200 | -2.32666700 |
| H  | -2.05011000 | -0.21802400 | -3.05597200 |
| Al | 1.58042800  | -0.17469900 | -0.42915000 |
| N  | 2.02395100  | -0.84531700 | 2.53464900  |
| C  | 1.76970500  | -1.34284300 | 1.30157000  |
| N  | 1.58537700  | -2.66497700 | 1.50068200  |
| C  | 1.74553900  | -2.99925300 | 2.82541000  |
| C  | 2.01822300  | -1.83994400 | 3.48554300  |
| C  | -3.47981700 | 0.77624600  | 0.31230700  |
| C  | -3.60116800 | 1.86992500  | 1.21344400  |
| C  | -4.70804700 | 0.25859500  | -0.17263400 |
| C  | -4.84665900 | 2.40117700  | 1.57547200  |
| C  | -5.94982200 | 0.79390800  | 0.20057600  |
| C  | -6.02721500 | 1.86983100  | 1.07360900  |
| H  | -4.87652500 | 3.24976400  | 2.26529000  |
| H  | -6.86178800 | 0.35553100  | -0.21576200 |

|   |             |             |             |
|---|-------------|-------------|-------------|
| H | -6.99494300 | 2.29107900  | 1.35734200  |
| C | 3.49993000  | 0.57824000  | -0.55534700 |
| C | 4.63273000  | -0.25703500 | -0.34365600 |
| C | 3.79585900  | 1.93980100  | -0.82250300 |
| C | 5.94004900  | 0.24889600  | -0.31434900 |
| C | 5.11149800  | 2.43234000  | -0.79502300 |
| C | 6.18625300  | 1.60007800  | -0.51869100 |
| H | 6.77314900  | -0.44185700 | -0.15395000 |
| H | 5.28060100  | 3.48935500  | -1.01988600 |
| H | 7.20627100  | 1.99208300  | -0.49801500 |
| C | -4.80254600 | -0.87697200 | -1.13946000 |
| C | -4.73877600 | -0.61537500 | -2.52271400 |
| C | -5.12917000 | -2.16534000 | -0.67082200 |
| C | -4.96488600 | -1.66517500 | -3.42070000 |
| C | -5.37888600 | -3.18346300 | -1.59670000 |
| C | -5.29258400 | -2.93858400 | -2.96432600 |
| H | -4.90886300 | -1.46729200 | -4.49447900 |
| H | -5.64662600 | -4.18064300 | -1.23471900 |
| C | -2.42566000 | 2.54103500  | 1.84528000  |
| C | -1.77484200 | 3.58998400  | 1.16551300  |
| C | -2.04586400 | 2.20661700  | 3.15885800  |
| C | -0.66857300 | 4.19718400  | 1.76333300  |
| C | -0.91838900 | 2.81949100  | 3.72022600  |
| C | -0.22018000 | 3.79645500  | 3.01909600  |
| H | -0.15006200 | 4.99321900  | 1.22666400  |
| H | -0.61132100 | 2.54782800  | 4.73496700  |
| C | 4.56352300  | -1.74933200 | -0.25583400 |
| C | 4.83851700  | -2.41691400 | 0.95424000  |
| C | 4.41399800  | -2.48760700 | -1.45139000 |
| C | 4.88545300  | -3.81614000 | 0.97054600  |
| C | 4.47880500  | -3.88420600 | -1.40104900 |
| C | 4.70605800  | -4.54929000 | -0.19879600 |
| H | 5.09167100  | -4.33137300 | 1.91328800  |
| H | 4.37097500  | -4.45346500 | -2.32828300 |
| C | 2.79315300  | 2.95502500  | -1.27089500 |
| C | 2.35483200  | 2.93129600  | -2.61083900 |
| C | 2.42661400  | 4.02070300  | -0.42497500 |
| C | 1.56296800  | 3.98245900  | -3.08502200 |
| C | 1.63714400  | 5.05567200  | -0.93510100 |
| C | 1.20739100  | 5.04192900  | -2.25907700 |
| H | 1.22497400  | 3.96277600  | -4.12438100 |
| H | 1.36786400  | 5.89235500  | -0.28429400 |
| C | -2.14799500 | -3.39288400 | -1.60810800 |
| H | -1.15463600 | -3.58327600 | -2.03522200 |
| H | -2.81978500 | -4.23667400 | -1.79888200 |
| H | -2.56720100 | -2.49317100 | -2.06940500 |
| C | -5.25299200 | -2.43076800 | 0.80245200  |
| H | -6.16397900 | -1.96707000 | 1.21345600  |
| H | -5.29564700 | -3.50910600 | 1.01147500  |
| H | -4.41125600 | -1.99457700 | 1.35983300  |
| C | -4.51490300 | 0.78252700  | -3.02007200 |
| H | -3.65996500 | 1.26266200  | -2.52309400 |
| H | -4.34232900 | 0.79670400  | -4.10521800 |
| H | -5.39551700 | 1.40883900  | -2.80291700 |
| C | 1.34874300  | -3.62240600 | 0.44134100  |
| H | 0.95388200  | -3.07990100 | -0.42847200 |
| H | 2.29120200  | -4.11075800 | 0.16254900  |

|   |             |             |             |
|---|-------------|-------------|-------------|
| H | 0.62063300  | -4.36887700 | 0.78306600  |
| C | -2.89399300 | 1.30263700  | 4.00998200  |
| H | -2.29199400 | 0.76847400  | 4.76082000  |
| H | -3.63883000 | 1.90027900  | 4.56219200  |
| H | -3.46226100 | 0.57900000  | 3.41227100  |
| C | -2.30326700 | 4.08970300  | -0.14683400 |
| H | -1.60433500 | 4.79955300  | -0.60990000 |
| H | -2.47154600 | 3.26641100  | -0.85326000 |
| H | -3.27100900 | 4.59721500  | 0.00064200  |
| C | 2.84323600  | 4.03879400  | 1.01749700  |
| H | 2.29943000  | 3.26211200  | 1.57759000  |
| H | 3.91669000  | 3.83862900  | 1.14267400  |
| H | 2.61225700  | 5.00661100  | 1.48504600  |
| C | 2.70744800  | 1.79592700  | -3.52458800 |
| H | 2.10264600  | 0.90555500  | -3.27966900 |
| H | 2.50302900  | 2.05809100  | -4.57212300 |
| H | 3.76486100  | 1.50900600  | -3.43055200 |
| C | 2.23734200  | 0.56038000  | 2.81307700  |
| H | 2.90246000  | 0.66175900  | 3.68030200  |
| H | 2.71237600  | 1.02544700  | 1.93974800  |
| H | 1.28379700  | 1.07165200  | 3.01193600  |
| C | -1.43041700 | -1.34466900 | 2.77847300  |
| H | -1.23218900 | -0.36704400 | 2.31979900  |
| H | -2.29972500 | -1.26311800 | 3.44103000  |
| H | -0.55094200 | -1.65090300 | 3.36034900  |
| C | 5.16644800  | -1.65330200 | 2.20613300  |
| H | 4.87884200  | -2.21806700 | 3.10456800  |
| H | 6.25109300  | -1.46440800 | 2.26822400  |
| H | 4.68051800  | -0.67029500 | 2.22515000  |
| C | 4.30339800  | -1.78506400 | -2.77283400 |
| H | 5.22351000  | -1.21333500 | -2.97536000 |
| H | 4.15443000  | -2.50295700 | -3.59138100 |
| H | 3.47627700  | -1.06355200 | -2.78676700 |
| H | 0.59580200  | 5.86064200  | -2.64635100 |
| H | 4.75941200  | -5.64092000 | -0.17656500 |
| H | 1.66520900  | -4.02194400 | 3.18293800  |
| H | 2.21532400  | -1.64676600 | 4.53646800  |
| H | -1.84483300 | -4.09420400 | 2.95158900  |
| H | -2.29317600 | -5.24052700 | 0.44860100  |
| H | -5.48637000 | -3.74253800 | -3.67906600 |
| H | 0.65693100  | 4.27260200  | 3.46443800  |

### 31) TS[7'-9']

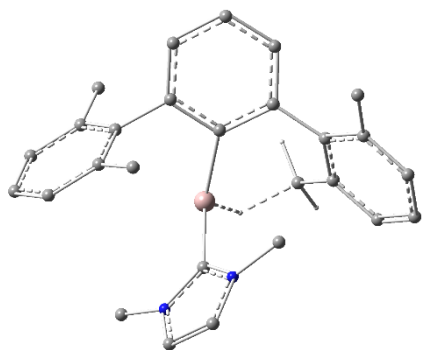



(Selected hydrogens are omitted for clarity)

Number of imaginary frequencies = 1 (1147.6 cm<sup>-1</sup>)

E<sub>total</sub> = -1395.913822 a.u

G<sub>correction</sub> = 0.430538 a.u

Cartesian coordinates:

|    |             |             |             |
|----|-------------|-------------|-------------|
| C  | 0.20225800  | -1.17132100 | 0.24828400  |
| C  | 1.53411900  | -1.66349900 | 0.13326000  |
| C  | 1.72581500  | -2.97209700 | -0.35367800 |
| H  | 2.72838900  | -3.40307500 | -0.34906300 |
| C  | 0.66488600  | -3.72931200 | -0.83380300 |
| H  | 0.84556100  | -4.74123300 | -1.20589200 |
| C  | -0.62551100 | -3.19631400 | -0.85757000 |
| H  | -1.45689800 | -3.76841000 | -1.27862700 |
| C  | -0.85103900 | -1.93593400 | -0.30227800 |
| C  | -2.21884500 | -1.33144600 | -0.28656600 |
| C  | -2.57178800 | -0.39723200 | -1.28453200 |
| C  | -3.82457100 | 0.22358000  | -1.22144400 |
| H  | -4.09884200 | 0.94879600  | -1.99303400 |
| C  | -4.72396500 | -0.08681700 | -0.20571300 |
| C  | -4.38174000 | -1.03000400 | 0.75906100  |
| H  | -5.08872100 | -1.27892700 | 1.55478900  |
| C  | -3.13560900 | -1.66278700 | 0.73480800  |
| C  | 2.68461100  | -0.76969500 | 0.39625900  |
| C  | 2.67804900  | 0.08862100  | 1.54433000  |
| C  | 3.65698700  | 1.10829800  | 1.63904900  |
| C  | 4.63751600  | 1.25452100  | 0.67699000  |
| C  | 4.66663400  | 0.39244300  | -0.42317300 |
| H  | 5.43380500  | 0.51442800  | -1.19198600 |
| C  | 3.70452600  | -0.61244000 | -0.57681800 |
| C  | 1.72401400  | -0.07660000 | 2.62070500  |
| H  | 0.27559200  | 0.48047000  | 2.83903900  |
| Al | -0.39433200 | 0.34394200  | 1.36766800  |
| C  | -0.42042500 | 2.07481100  | 0.22977700  |
| N  | 0.36000400  | 2.50694200  | -0.78412700 |
| C  | -0.13892300 | 3.66086300  | -1.33446600 |
| C  | -1.27730100 | 3.95845700  | -0.64899700 |
| N  | -1.42704900 | 2.97917700  | 0.30113400  |
| H  | -5.70200700 | 0.40039200  | -0.17165100 |
| H  | -1.98448800 | 4.77523400  | -0.76344900 |
| H  | 0.34862400  | 4.17239700  | -2.15988900 |
| H  | 2.01608300  | 0.42095300  | 3.55304100  |
| H  | 1.40078500  | -1.10978400 | 2.79624200  |
| H  | 3.64469900  | 1.76246200  | 2.51528300  |
| H  | 5.39489500  | 2.03664200  | 0.77953700  |
| C  | -2.76114400 | -2.65389000 | 1.79503300  |
| H  | -2.46228400 | -3.61864500 | 1.35943600  |
| H  | -1.89557600 | -2.28507500 | 2.37107300  |
| H  | -3.59219000 | -2.82452300 | 2.49299100  |
| C  | -1.63872500 | -0.09526800 | -2.42278200 |
| H  | -1.99151200 | 0.76587200  | -3.00806400 |
| H  | -0.61927200 | 0.10818000  | -2.06860700 |
| H  | -1.55925100 | -0.95964200 | -3.10141600 |
| C  | 3.76500500  | -1.42464800 | -1.84451400 |

|   |             |             |             |
|---|-------------|-------------|-------------|
| H | 4.21342400  | -2.41750700 | -1.68364300 |
| H | 2.76799900  | -1.59856200 | -2.27509800 |
| H | 4.38396600  | -0.90935400 | -2.59301100 |
| C | -2.55977400 | 2.89231200  | 1.20201700  |
| H | -3.46620200 | 2.61783500  | 0.64423300  |
| H | -2.34998900 | 2.09962400  | 1.93800800  |
| H | -2.70257500 | 3.85240600  | 1.71639500  |
| C | 1.56788100  | 1.83921400  | -1.23031800 |
| H | 2.42637500  | 2.10810500  | -0.59950800 |
| H | 1.42057700  | 0.75545100  | -1.16143300 |
| H | 1.76702700  | 2.11851500  | -2.27196700 |

### 32) Intermediate 9'

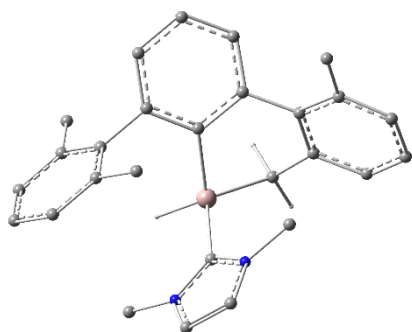

(Selected hydrogens are omitted for clarity)

Number of imaginary frequencies = 0

$E_{\text{total}} = -1396.016764$  a.u

$G_{\text{correction}} = 0.433242$  a.u

Cartesian coordinates:

|   |             |             |             |
|---|-------------|-------------|-------------|
| C | 0.23847600  | -1.09293000 | 0.21749400  |
| C | 1.55994500  | -1.59462800 | 0.09564500  |
| C | 1.75758800  | -2.91629700 | -0.33264100 |
| H | 2.76714100  | -3.33164800 | -0.35254600 |
| C | 0.68511600  | -3.70751200 | -0.73495300 |
| H | 0.85990900  | -4.73486300 | -1.06485600 |
| C | -0.60414800 | -3.18155500 | -0.73903700 |
| H | -1.44610500 | -3.78076900 | -1.09777500 |
| C | -0.82507500 | -1.88725500 | -0.25306900 |
| C | -2.20754000 | -1.31977500 | -0.25555200 |
| C | -2.58349300 | -0.43774300 | -1.28964300 |
| C | -3.87561200 | 0.09885500  | -1.29254300 |
| H | -4.17182700 | 0.77131500  | -2.10288700 |
| C | -4.78434700 | -0.22720600 | -0.28918000 |
| C | -4.40531100 | -1.09412500 | 0.73114400  |
| H | -5.11565500 | -1.35039300 | 1.52180000  |
| C | -3.12314800 | -1.65289600 | 0.76210400  |
| C | 2.73574300  | -0.69753700 | 0.32650600  |
| C | 2.78607900  | 0.16994500  | 1.45480000  |
| C | 3.87632500  | 1.04366900  | 1.58917100  |
| C | 4.88378800  | 1.10583600  | 0.63504800  |

|    |             |             |             |
|----|-------------|-------------|-------------|
| C  | 4.80903700  | 0.29253700  | -0.48891400 |
| H  | 5.57971300  | 0.35524200  | -1.26195100 |
| C  | 3.74926200  | -0.60781400 | -0.66044200 |
| C  | 1.67639500  | 0.24755900  | 2.43957700  |
| H  | -1.33603100 | 0.29694700  | 2.46195500  |
| Al | -0.06501700 | 0.42246200  | 1.48026700  |
| C  | -0.46475100 | 2.10436400  | 0.33757200  |
| N  | 0.27582600  | 2.60815500  | -0.67639300 |
| C  | -0.40568800 | 3.59950300  | -1.33926600 |
| C  | -1.61111900 | 3.72273400  | -0.72071000 |
| N  | -1.62164100 | 2.80365100  | 0.30084900  |
| H  | -5.79413700 | 0.19135700  | -0.30565600 |
| H  | -2.45111000 | 4.38180400  | -0.92094300 |
| H  | 0.01758800  | 4.13284200  | -2.18579700 |
| H  | 1.91131500  | 0.94610100  | 3.25517900  |
| H  | 1.48290200  | -0.74244400 | 2.89605400  |
| H  | 3.91781000  | 1.69036800  | 2.46981500  |
| H  | 5.72190600  | 1.79619800  | 0.76188800  |
| C  | -2.72016400 | -2.57322900 | 1.87546000  |
| H  | -2.35882400 | -3.53888800 | 1.49235800  |
| H  | -1.89386100 | -2.13167100 | 2.45475500  |
| H  | -3.55879100 | -2.76057700 | 2.56029000  |
| C  | -1.61980300 | -0.09297900 | -2.38887700 |
| H  | -2.07273900 | 0.59943500  | -3.11251900 |
| H  | -0.70645800 | 0.36788300  | -1.98520100 |
| H  | -1.29193500 | -0.99574400 | -2.92724200 |
| C  | 3.71779100  | -1.38631100 | -1.95091400 |
| H  | 4.14745800  | -2.39473000 | -1.84326100 |
| H  | 2.69509900  | -1.52067500 | -2.33085200 |
| H  | 4.31028900  | -0.86595900 | -2.71758300 |
| C  | -2.76504800 | 2.58276800  | 1.16548600  |
| H  | -3.58163900 | 2.12429400  | 0.59010800  |
| H  | -2.47170100 | 1.88483600  | 1.95875700  |
| H  | -3.09141900 | 3.53749600  | 1.59984000  |
| C  | 1.58952600  | 2.12161900  | -1.05496300 |
| H  | 2.30483700  | 2.23766100  | -0.23051600 |
| H  | 1.53346000  | 1.05459900  | -1.30811800 |
| H  | 1.93977500  | 2.68775400  | -1.92558400 |

### 33) C-H activation product **8'**

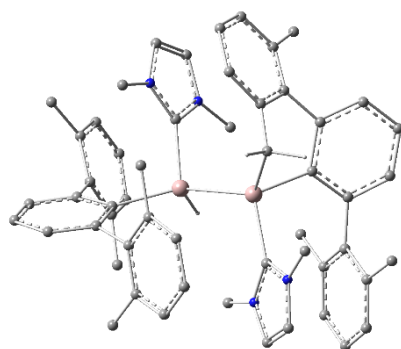

(Selected hydrogens are omitted for clarity)

Number of imaginary frequencies = 0

$E_{\text{total}} = -2792.065631 \text{ a.u}$

$G_{\text{correction}} = 0.898652 \text{ a.u}$

Cartesian coordinates:

|    |             |             |             |
|----|-------------|-------------|-------------|
| C  | -2.06918400 | 1.95383100  | -0.00800000 |
| C  | -1.69157800 | 3.11513600  | -0.74168800 |
| C  | -2.33393700 | 4.34215500  | -0.52065200 |
| H  | -2.08637800 | 5.19739400  | -1.15271100 |
| C  | -3.29129400 | 4.48384900  | 0.47738100  |
| H  | -3.77933100 | 5.44775200  | 0.64292500  |
| C  | -3.62286600 | 3.38188600  | 1.25477600  |
| H  | -4.36919500 | 3.47260800  | 2.04978500  |
| C  | -3.03645700 | 2.13089900  | 1.00592500  |
| C  | -0.61806300 | 3.07395400  | -1.78330300 |
| C  | -0.62380400 | 2.04714600  | -2.76986000 |
| C  | 0.33428700  | 2.09316600  | -3.79352400 |
| H  | 0.29967400  | 1.32867300  | -4.57409200 |
| C  | 1.30233800  | 3.09034100  | -3.84139400 |
| C  | 1.34499600  | 4.05134200  | -2.83976700 |
| H  | 2.12217500  | 4.82039800  | -2.84964500 |
| C  | 0.39553000  | 4.06002600  | -1.80903000 |
| C  | -1.58026600 | 0.91178400  | -2.68959500 |
| Al | -1.29920700 | 0.23126700  | -0.79228700 |
| H  | 2.02996800  | 3.11204500  | -4.65766000 |
| H  | -1.44865500 | 0.23076000  | -3.54300300 |
| H  | -2.61748300 | 1.28863100  | -2.69567400 |
| H  | 0.73987200  | -0.15211900 | 1.87344900  |
| C  | -3.55205600 | 1.00699100  | 1.84731500  |
| C  | -4.76251500 | 0.37961800  | 1.48828500  |
| C  | -2.90068500 | 0.64976400  | 3.04415900  |
| C  | -5.28563900 | -0.62405200 | 2.30888200  |
| C  | -3.46227900 | -0.34467300 | 3.85344100  |
| C  | -4.64151400 | -0.98573200 | 3.48834800  |
| H  | -6.21854200 | -1.11664300 | 2.02102100  |
| H  | -2.96077000 | -0.61455300 | 4.78725300  |
| H  | -5.06721800 | -1.76041500 | 4.13169000  |
| C  | -4.39609100 | -2.74002700 | -0.56879300 |
| C  | -3.70499200 | -3.03000900 | 0.56446500  |
| H  | -5.28367500 | -3.19477900 | -0.99891700 |
| H  | -3.87345300 | -3.78183400 | 1.32930300  |
| C  | -2.67936000 | -1.28851200 | -0.42418600 |
| N  | -3.75162400 | -1.67606400 | -1.15568800 |
| N  | -2.66515500 | -2.13770900 | 0.62712400  |
| Al | 1.01182100  | -0.28870600 | 0.27424700  |
| C  | 2.29105100  | -1.85793900 | -0.04897900 |
| C  | 2.22302900  | 1.36772100  | -0.01976400 |
| C  | 3.55791100  | -1.89279200 | 0.59737700  |
| C  | 2.02249200  | -2.91282800 | -0.95430800 |
| N  | 3.12980200  | 1.62675500  | -0.98913300 |
| N  | 2.27315500  | 2.45035700  | 0.78968900  |
| C  | 4.51345100  | -2.86779100 | 0.28609200  |
| C  | 3.89160700  | -0.92112400 | 1.68483700  |
| C  | 2.99696300  | -3.87084000 | -1.27464500 |
| C  | 0.66106700  | -3.16189200 | -1.52608500 |
| C  | 3.74543800  | 2.83937800  | -0.78529300 |
| C  | 3.20883000  | 3.35629500  | 0.35067200  |

|   |             |             |             |
|---|-------------|-------------|-------------|
| H | 5.47309000  | -2.86274300 | 0.81083900  |
| C | 4.24888100  | -3.84057500 | -0.67288000 |
| C | 3.25226300  | -1.05255500 | 2.93780000  |
| C | 4.85896800  | 0.08571500  | 1.49311500  |
| H | 2.75170100  | -4.65908700 | -1.99264200 |
| C | -0.14084700 | -4.13909000 | -0.89775300 |
| C | 0.21826700  | -2.54606600 | -2.71126100 |
| H | 4.49929900  | 3.23198500  | -1.46087700 |
| H | 3.40825700  | 4.28682700  | 0.87330600  |
| H | 5.00414100  | -4.58871500 | -0.92690700 |
| C | 3.51045900  | -0.10866800 | 3.93522800  |
| C | 5.07925000  | 1.02400500  | 2.50825400  |
| C | -1.38709400 | -4.45722400 | -1.44553200 |
| C | -1.02878900 | -2.89687400 | -3.23892200 |
| H | 3.00873900  | -0.20757700 | 4.90172700  |
| C | 4.39725400  | 0.94189200  | 3.71641000  |
| H | 5.81002800  | 1.82132800  | 2.34562700  |
| H | -2.00979600 | -5.20946400 | -0.95419200 |
| C | -1.83176400 | -3.84236500 | -2.61075600 |
| H | -1.35893600 | -2.42645300 | -4.16951100 |
| H | 4.57878900  | 1.68023400  | 4.50173800  |
| H | -2.80227400 | -4.11134800 | -3.03578200 |
| C | -4.14831400 | -1.09842100 | -2.42030500 |
| H | -3.36292400 | -1.25512700 | -3.16984700 |
| H | -5.07442800 | -1.58236700 | -2.75347300 |
| H | -4.32605700 | -0.02265400 | -2.31424800 |
| C | 1.06072400  | -1.52149300 | -3.40277600 |
| H | 0.73343200  | -1.36847100 | -4.44067100 |
| H | 0.97497300  | -0.55437100 | -2.88047000 |
| H | 2.12246300  | -1.80705900 | -3.40526700 |
| C | 0.34819700  | -4.87257300 | 0.32120100  |
| H | -0.48170900 | -5.37329600 | 0.84091300  |
| H | 1.08552900  | -5.64454400 | 0.04735100  |
| H | 0.86172000  | -4.20353600 | 1.02707400  |
| C | 3.36656100  | 0.78451100  | -2.13828800 |
| H | 3.19829000  | -0.26161200 | -1.85694200 |
| H | 2.68343300  | 1.06436900  | -2.95119600 |
| H | 4.40507900  | 0.90566400  | -2.47118100 |
| C | 1.44971900  | 2.63324800  | 1.96556800  |
| H | 0.38841500  | 2.60904400  | 1.68353900  |
| H | 1.64703100  | 1.83131600  | 2.68817600  |
| H | 1.68593800  | 3.60743300  | 2.41056700  |
| C | 0.53278600  | 5.12791000  | -0.75494700 |
| H | -0.04278400 | 6.03415800  | -1.00218100 |
| H | 0.17929200  | 4.78833800  | 0.22804800  |
| H | 1.58548600  | 5.43248300  | -0.66633400 |
| C | -5.50763300 | 0.80927600  | 0.25762200  |
| H | -6.12982300 | 1.69573700  | 0.46398400  |
| H | -4.81677900 | 1.10209200  | -0.54452400 |
| H | -6.17159600 | 0.01096500  | -0.10546300 |
| C | -1.61874800 | 1.31416200  | 3.44930900  |
| H | -1.38291200 | 1.11025500  | 4.50362000  |
| H | -0.77761300 | 0.94127900  | 2.83985700  |
| H | -1.66919000 | 2.40286900  | 3.30239700  |
| C | -1.64912500 | -2.16307300 | 1.65654700  |
| H | -0.80938500 | -2.79324000 | 1.33699500  |
| H | -1.27238100 | -1.15230100 | 1.83944300  |

|   |             |             |             |
|---|-------------|-------------|-------------|
| H | -2.08676500 | -2.55133400 | 2.58329200  |
| C | 2.33156300  | -2.20346500 | 3.22016200  |
| H | 2.13360000  | -2.28998400 | 4.29789600  |
| H | 1.36939400  | -2.05521900 | 2.70595900  |
| H | 2.75637800  | -3.15286900 | 2.86167600  |
| C | 5.70911300  | 0.14302100  | 0.25586800  |
| H | 5.96827400  | 1.18058300  | 0.00001000  |
| H | 6.65642400  | -0.39824300 | 0.41865600  |
| H | 5.22336400  | -0.33016500 | -0.60464400 |

## 2.7. First few mechanistic steps explored for the formation of benzene deconstruction product and C-H activation product using the experimental alumylene 7

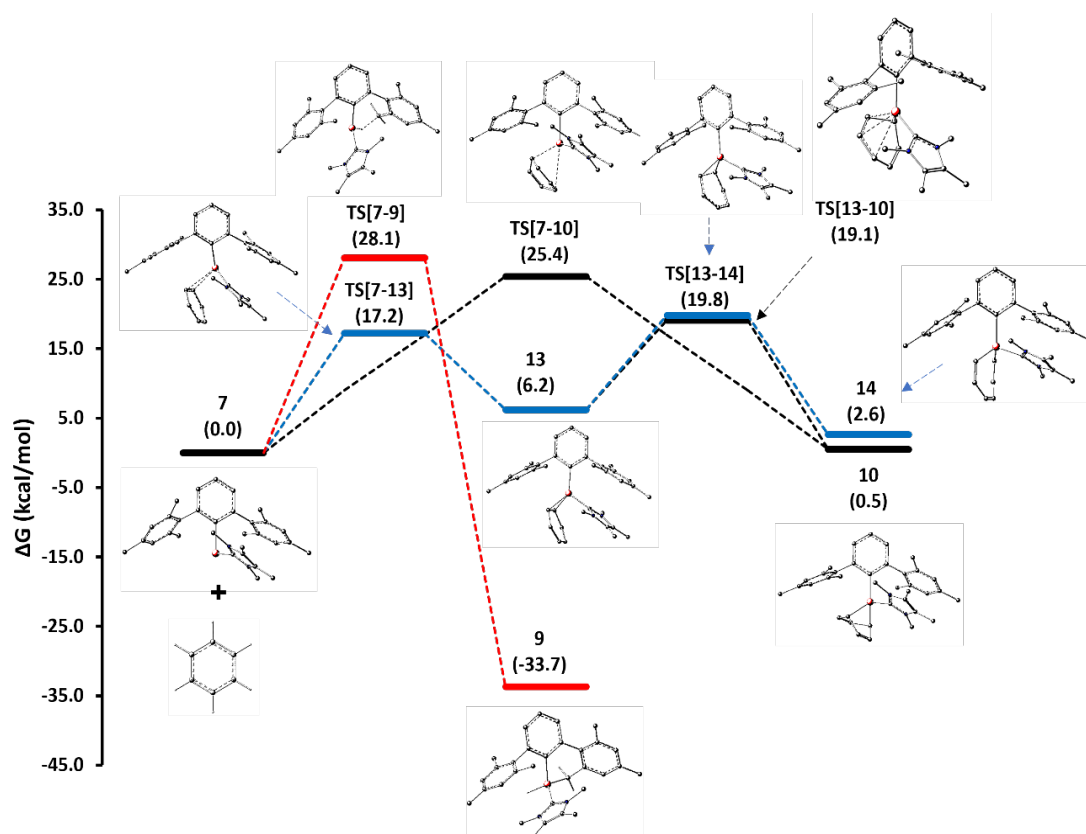

**Figure S36.** A few mechanistic steps computed for the formation of benzene deconstruction product **4** (black and blue pathways) and the C-H activation product **8** (red pathway) from the hypothesised experimental alumylene **7**. Free energies in parentheses are in kcal/mol.

The free energy profiles obtained using the hypothesized experimental alumylene **7** exhibit a similar trend and energetics to those obtained using the model alumylene **7'**. Thus, this specifies that the model used can reliably represent the mechanistic pathways followed by the experimental system.

Note: Details on structure and energies of species **7**, benzene, **4** and **8** are presented above.

### 34) TS[7-10]

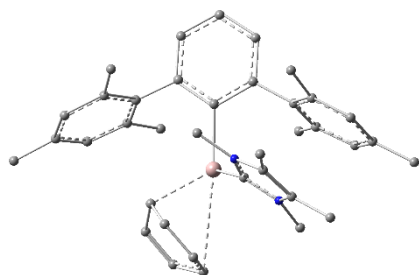

(Hydrogens are omitted for clarity)

Number of imaginary frequencies = 1 (120.6 cm<sup>-1</sup>)

E<sub>total</sub> = -1784.750405 a.u

G<sub>correction</sub> = 0.629548 a.u

Cartesian coordinates:

|    |             |             |             |
|----|-------------|-------------|-------------|
| C  | -1.75349500 | -3.31314800 | -2.29961400 |
| C  | -0.46473800 | -3.62795000 | -1.75903900 |
| C  | -0.30689100 | -3.62172100 | -0.35956700 |
| C  | -1.17088900 | -2.85604600 | 0.40523200  |
| C  | -2.09063100 | -1.99906500 | -0.31392700 |
| C  | -2.59833000 | -2.54478300 | -1.56122600 |
| H  | -2.02405900 | -3.66687400 | -3.29799400 |
| H  | 0.25598500  | -4.16962300 | -2.37752900 |
| H  | 0.50988900  | -4.18115500 | 0.10742000  |
| H  | -1.10657500 | -2.82785700 | 1.49551900  |
| H  | -3.58351900 | -2.24298000 | -1.92269700 |
| H  | -2.79790200 | -1.42157000 | 0.29087000  |
| Al | -0.40280300 | -0.56531700 | -0.73993500 |
| C  | -0.59304600 | 1.40501200  | -0.15572100 |
| C  | 1.19324200  | -1.11548700 | 0.49057900  |
| C  | 0.51865700  | 2.28381400  | -0.24850000 |
| C  | -1.84554300 | 2.01116700  | 0.11888900  |
| N  | 1.31067400  | -0.94671600 | 1.82617600  |
| N  | 2.36887800  | -1.65531100 | 0.11063800  |
| C  | 0.38286700  | 3.66385000  | -0.04953500 |
| C  | 1.89091300  | 1.79723800  | -0.58921500 |
| C  | -1.96863300 | 3.39117900  | 0.32405000  |
| C  | -3.09738000 | 1.20069600  | 0.18506500  |
| C  | 2.54578900  | -1.37525400 | 2.28817900  |
| C  | 3.22369400  | -1.82064700 | 1.18813400  |
| H  | 1.26594500  | 4.30416700  | -0.13638200 |
| C  | -0.85688900 | 4.22271900  | 0.24316800  |
| C  | 2.88041200  | 1.71531900  | 0.40805700  |
| C  | 2.22922300  | 1.51073900  | -1.93042600 |
| H  | -2.95566800 | 3.81181300  | 0.53767400  |
| C  | -3.66779100 | 0.86965300  | 1.42798600  |
| C  | -3.73412400 | 0.79439000  | -1.00675200 |
| H  | -0.95738200 | 5.30051700  | 0.39391800  |



|   |             |             |             |
|---|-------------|-------------|-------------|
| C | 4.16861100  | 1.29049700  | 0.06616200  |
| C | 3.53271500  | 1.11235800  | -2.23271900 |
| C | -4.83142400 | 0.09326600  | 1.46226100  |
| C | -4.90943400 | 0.04616000  | -0.92785900 |
| H | 4.92636200  | 1.21537600  | 0.85272400  |
| C | 4.51716300  | 0.98288300  | -1.24844500 |
| H | 3.78776500  | 0.90036800  | -3.27595700 |
| H | -5.25726200 | -0.17995800 | 2.43288900  |
| C | -5.46641200 | -0.33391400 | 0.29604100  |
| H | -5.40030500 | -0.26182800 | -1.85644200 |
| C | 1.21710300  | 1.65724600  | -3.02964600 |
| H | 1.69656300  | 1.61500600  | -4.01747800 |
| H | 0.46567200  | 0.84647500  | -2.98413900 |
| H | 0.66429600  | 2.60403000  | -2.94115200 |
| C | 2.58930300  | 2.12122700  | 1.82442800  |
| H | 3.27814300  | 1.62978900  | 2.52704800  |
| H | 2.71000900  | 3.20966500  | 1.95263200  |
| H | 1.55433900  | 1.89249000  | 2.10853100  |
| C | -3.14258500 | 1.11732400  | -2.34626900 |
| H | -3.87889800 | 0.97814300  | -3.15006200 |
| H | -2.75850300 | 2.14679800  | -2.38606800 |
| H | -2.28440400 | 0.45007800  | -2.55704900 |
| C | -3.06993600 | 1.35715100  | 2.71872900  |
| H | -3.28113800 | 0.66041200  | 3.54352400  |
| H | -1.98436800 | 1.50266300  | 2.64124900  |
| H | -3.49170700 | 2.33628600  | 3.00122000  |
| C | 2.69484200  | -2.06233800 | -1.23630300 |
| H | 1.86511400  | -1.76164500 | -1.89214100 |
| H | 3.62522400  | -1.58135000 | -1.56241500 |
| H | 2.79728200  | -3.15664100 | -1.28856000 |
| C | 0.24217000  | -0.47624200 | 2.67234600  |
| H | -0.49139400 | 0.04444500  | 2.04462000  |
| H | -0.24886100 | -1.31390200 | 3.19129700  |
| H | 0.62633800  | 0.23107900  | 3.41896900  |
| C | 5.90602200  | 0.53529000  | -1.60657200 |
| H | 5.90937000  | -0.48580600 | -2.02405000 |
| H | 6.35336000  | 1.18935800  | -2.37161400 |
| H | 6.57066600  | 0.54145500  | -0.73069200 |
| C | 4.59983100  | -2.35170200 | 1.04017500  |
| H | 5.08891300  | -2.42836400 | 2.01972900  |
| H | 4.60679000  | -3.35270000 | 0.58087900  |
| H | 5.21342600  | -1.69026600 | 0.40737900  |
| C | 2.94216400  | -1.30570600 | 3.71594200  |
| H | 2.25242100  | -1.87333300 | 4.36083700  |
| H | 3.94698100  | -1.72556300 | 3.85299100  |
| H | 2.96135700  | -0.26745700 | 4.08552700  |
| C | -6.69151700 | -1.19985500 | 0.34601400  |
| H | -7.17551600 | -1.16086500 | 1.33239300  |
| H | -7.43069500 | -0.89609900 | -0.41059400 |
| H | -6.43469400 | -2.25318800 | 0.14402100  |

### 35) Intermediate 10

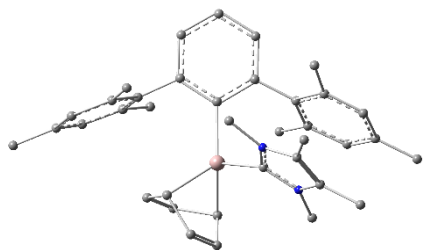

(Hydrogens are omitted for clarity)

Number of imaginary frequencies = 0

$E_{\text{total}} = -1784.793549$  a.u

$G_{\text{correction}} = 0.632451$  a.u

Cartesian coordinates:

|    |             |             |             |
|----|-------------|-------------|-------------|
| C  | -1.95924900 | -1.04278000 | -2.60827600 |
| C  | -0.45131400 | -1.14403000 | -2.58814000 |
| C  | -0.06324600 | -2.58442000 | -2.37795400 |
| C  | -0.65893000 | -3.16417600 | -1.31242100 |
| C  | -1.60681900 | -2.26346500 | -0.57267600 |
| C  | -2.55894700 | -1.63337300 | -1.55346500 |
| H  | -2.50333400 | -0.56019200 | -3.42555200 |
| H  | 0.04854700  | -0.65006200 | -3.43124400 |
| H  | 0.61371100  | -3.11671600 | -3.05395000 |
| H  | -0.50059000 | -4.20892200 | -1.02585200 |
| H  | -3.64068900 | -1.66429300 | -1.40600200 |
| H  | -2.08555500 | -2.70960800 | 0.30635400  |
| Al | -0.34506200 | -0.64552900 | -0.59509200 |
| C  | -0.70846100 | 1.11909600  | 0.34589400  |
| C  | 1.46799900  | -1.27816100 | 0.20856800  |
| C  | 0.35187000  | 2.02896700  | 0.59760100  |
| C  | -1.97312600 | 1.46341000  | 0.88448300  |
| N  | 1.66980100  | -1.56599200 | 1.51117900  |
| N  | 2.64500400  | -1.54587400 | -0.38738700 |
| C  | 0.16626400  | 3.17847100  | 1.37685400  |
| C  | 1.70798700  | 1.85158300  | -0.00248900 |
| C  | -2.13969700 | 2.60904900  | 1.67765200  |
| C  | -3.23004500 | 0.71354000  | 0.57766300  |
| C  | 2.96280600  | -2.00903300 | 1.74161700  |
| C  | 3.58737300  | -1.98866500 | 0.52548200  |
| H  | 1.00704500  | 3.86056900  | 1.53124700  |
| C  | -1.07386200 | 3.46182600  | 1.93646000  |
| C  | 2.82669800  | 1.58890300  | 0.81055600  |
| C  | 1.88602800  | 2.04702000  | -1.39108800 |
| H  | -3.13329800 | 2.83425600  | 2.07536300  |
| C  | -3.73604100 | -0.27545600 | 1.43490900  |
| C  | -3.97386800 | 1.10468700  | -0.55566600 |
| H  | -1.21443900 | 4.35511300  | 2.55044800  |
| C  | 4.09044900  | 1.46999700  | 0.22222500  |
| C  | 3.16807900  | 1.94138700  | -1.93324900 |
| C  | -4.96424200 | -0.87609600 | 1.13554900  |
| C  | -5.20144400 | 0.49547000  | -0.80947200 |
| H  | 4.95129100  | 1.24956300  | 0.86167200  |
| C  | 4.28502600  | 1.64277500  | -1.14721900 |

|   |             |             |             |
|---|-------------|-------------|-------------|
| H | 3.29881400  | 2.10611900  | -3.00747800 |
| H | -5.35031100 | -1.65043900 | 1.80589900  |
| C | -5.71352900 | -0.50688600 | 0.01982100  |
| H | -5.77228900 | 0.80579000  | -1.69009900 |
| C | 0.72970400  | 2.41679000  | -2.27692500 |
| H | 1.08321400  | 2.74404700  | -3.26458500 |
| H | 0.04686800  | 1.56626100  | -2.42715700 |
| H | 0.13072600  | 3.22427300  | -1.83053300 |
| C | 2.70376600  | 1.46160700  | 2.30288500  |
| H | 3.48590100  | 0.80142200  | 2.70583200  |
| H | 2.81970100  | 2.44217000  | 2.79338500  |
| H | 1.71941200  | 1.08028500  | 2.60176800  |
| C | -3.44030200 | 2.14731600  | -1.49298200 |
| H | -4.16639700 | 2.37762400  | -2.28499600 |
| H | -3.18724500 | 3.07982700  | -0.96603000 |
| H | -2.51366800 | 1.78980300  | -1.96929000 |
| C | -2.97740800 | -0.72007300 | 2.65209600  |
| H | -2.28526500 | -1.53734700 | 2.39251700  |
| H | -2.38114600 | 0.09676300  | 3.08268600  |
| H | -3.65765100 | -1.10115800 | 3.42741400  |
| C | 2.89604200  | -1.43945000 | -1.80523900 |
| H | 2.09319300  | -0.85266200 | -2.26049700 |
| H | 3.85181300  | -0.93075400 | -1.97714100 |
| H | 2.91155100  | -2.43787200 | -2.26517900 |
| C | 0.64050200  | -1.48060800 | 2.51963300  |
| H | -0.13600900 | -0.78640600 | 2.17690500  |
| H | 0.18501700  | -2.46555700 | 2.70152000  |
| H | 1.05946400  | -1.09688400 | 3.45878400  |
| C | -7.01706800 | -1.17885100 | -0.30193600 |
| H | -7.42464600 | -1.70972100 | 0.57035300  |
| H | -7.77071400 | -0.45367100 | -0.64462700 |
| H | -6.88977900 | -1.91916600 | -1.10946600 |
| C | 5.64783200  | 1.51690300  | -1.76630200 |
| H | 5.69546700  | 0.67312500  | -2.47548500 |
| H | 5.91462400  | 2.42118900  | -2.33544900 |
| H | 6.42451100  | 1.35827900  | -1.00441100 |
| C | 3.46073900  | -2.38761800 | 3.08671300  |
| H | 2.85943400  | -3.19487000 | 3.53420400  |
| H | 4.49742600  | -2.74214900 | 3.02190600  |
| H | 3.44395900  | -1.53507100 | 3.78551600  |
| C | 4.98210400  | -2.31408800 | 0.14134400  |
| H | 5.50524900  | -1.42552600 | -0.24849500 |
| H | 5.54387000  | -2.67907300 | 1.01067400  |
| H | 5.02236700  | -3.09283500 | -0.63631800 |

### 36) TS[7-13]

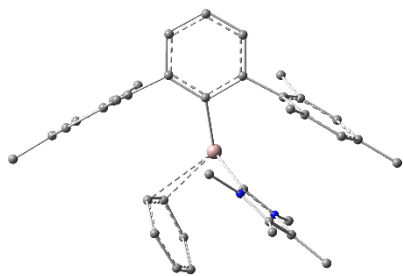

(Hydrogens are omitted for clarity)

Number of imaginary frequencies = 1 (121.0 cm<sup>-1</sup>)

E<sub>total</sub> = -1784.765423 a.u

G<sub>correction</sub> = 0.630004 a.u

Cartesian coordinates:

|    |             |             |             |
|----|-------------|-------------|-------------|
| Al | -0.13035100 | 0.00409200  | -1.11437800 |
| C  | -1.83181500 | -2.05256800 | -0.40475600 |
| C  | -1.29382200 | -3.10556600 | 0.34633300  |
| C  | -0.39104000 | -4.00265100 | -0.20565900 |
| C  | -0.05691600 | -3.87252700 | -1.57736000 |
| C  | -0.58506400 | -2.86011500 | -2.34176400 |
| C  | -1.43521100 | -1.86101900 | -1.76283200 |
| H  | -2.61128300 | -1.42378300 | 0.02560900  |
| H  | -2.07989700 | -1.27758300 | -2.42271100 |
| H  | -0.33889500 | -2.78955800 | -3.40424400 |
| H  | -1.63177700 | -3.23927200 | 1.37797100  |
| H  | 0.01637600  | -4.82419500 | 0.38700600  |
| H  | 0.60248400  | -4.61097500 | -2.04315600 |
| C  | -0.69793100 | 1.57316200  | 0.05869500  |
| C  | -2.00634800 | 1.99598400  | 0.40408600  |
| C  | 0.34608100  | 2.51541000  | 0.27717200  |
| C  | -2.24382900 | 3.26509000  | 0.94749000  |
| C  | 0.09630100  | 3.77905600  | 0.81938200  |
| C  | -1.20000200 | 4.16053700  | 1.15768500  |
| H  | -3.26909500 | 3.55110500  | 1.20056500  |
| H  | 0.93147200  | 4.46973800  | 0.97087300  |
| H  | -1.39535500 | 5.15138400  | 1.57504400  |
| C  | 1.18231400  | -1.05951500 | 0.09576400  |
| N  | 1.23156800  | -1.29975200 | 1.42437300  |
| N  | 2.31630300  | -1.60739200 | -0.39027800 |
| C  | 2.38213400  | -1.98470400 | 1.77427500  |
| C  | 0.18506900  | -0.95801900 | 2.35579000  |
| C  | 3.07919100  | -2.17547700 | 0.61269100  |
| C  | 2.68137300  | -1.61949500 | -1.78721400 |
| H  | -0.36445200 | -1.85769500 | 2.66590400  |
| H  | 0.60630200  | -0.46838300 | 3.24284700  |
| H  | -0.50381300 | -0.27018600 | 1.85083300  |
| H  | 1.90478700  | -1.05794700 | -2.33702700 |
| H  | 3.64727800  | -1.11891900 | -1.93446800 |
| H  | 2.72791300  | -2.65199400 | -2.16040900 |
| C  | -3.17215800 | 1.08917500  | 0.20816200  |
| C  | -3.69589000 | 0.87604700  | -1.08349600 |
| C  | -3.75794800 | 0.44253500  | 1.31422200  |
| C  | -4.75114300 | -0.02462500 | -1.24887000 |

|   |             |             |             |
|---|-------------|-------------|-------------|
| C | -4.81250700 | -0.45130700 | 1.10468800  |
| C | -5.31328300 | -0.71375000 | -0.17170700 |
| H | -5.14727300 | -0.19242100 | -2.25521500 |
| H | -5.24885500 | -0.96659200 | 1.96609400  |
| C | 1.75270700  | 2.16240200  | -0.09199500 |
| C | 2.18990500  | 2.31600800  | -1.42857000 |
| C | 2.65495100  | 1.69974400  | 0.88289300  |
| C | 3.48486800  | 1.91982000  | -1.76890700 |
| C | 3.94057400  | 1.30179000  | 0.49765200  |
| C | 4.37049000  | 1.38968000  | -0.82508200 |
| H | 3.81278200  | 2.03546600  | -2.80666200 |
| H | 4.62789500  | 0.92299500  | 1.26080800  |
| C | -3.27166300 | 0.70109700  | 2.71280800  |
| H | -3.68827300 | 1.64064000  | 3.11122700  |
| H | -3.57192800 | -0.10908000 | 3.39304300  |
| H | -2.17939700 | 0.81326700  | 2.75109300  |
| C | -3.14225100 | 1.61203500  | -2.26941700 |
| H | -3.77828200 | 1.47106900  | -3.15446900 |
| H | -3.05665900 | 2.68944800  | -2.06336300 |
| H | -2.12223200 | 1.26388200  | -2.52134900 |
| C | -6.39998400 | -1.72664400 | -0.38597400 |
| H | -7.02100800 | -1.85095700 | 0.51304000  |
| H | -7.05748900 | -1.44336900 | -1.22113300 |
| H | -5.97067600 | -2.71315900 | -0.62904700 |
| C | 2.28616200  | 1.68447200  | 2.33787900  |
| H | 2.79343200  | 0.86630500  | 2.87093600  |
| H | 2.59489600  | 2.62707800  | 2.82039900  |
| H | 1.20248000  | 1.60039700  | 2.48271900  |
| C | 1.30659000  | 2.97177800  | -2.45130300 |
| H | 0.34330100  | 2.44542400  | -2.54169600 |
| H | 1.08725000  | 4.01213900  | -2.16290600 |
| H | 1.78521000  | 2.97750200  | -3.44025200 |
| C | 5.75331400  | 0.96103600  | -1.22702500 |
| H | 6.30343800  | 0.52668800  | -0.37971200 |
| H | 5.72844000  | 0.21184500  | -2.03553300 |
| H | 6.34187800  | 1.81226300  | -1.60554300 |
| C | 2.68839600  | -2.38290600 | 3.16996500  |
| H | 3.63484100  | -2.93725200 | 3.21045900  |
| H | 2.78472500  | -1.50884100 | 3.83460200  |
| H | 1.90257200  | -3.03114800 | 3.58960000  |
| C | 4.39192400  | -2.81482800 | 0.35468200  |
| H | 5.11383900  | -2.09332100 | -0.06111300 |
| H | 4.81464100  | -3.21372900 | 1.28573100  |
| H | 4.30665700  | -3.64832700 | -0.36043900 |

### 37) Intermediate 13

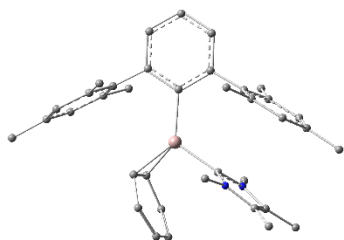

(Hydrogens are omitted for clarity)

Number of imaginary frequencies = 0

$E_{\text{total}} = -1784.784479$  a.u

$G_{\text{correction}} = 0.630562$  a.u

Cartesian coordinates:

|    |             |             |             |
|----|-------------|-------------|-------------|
| Al | 0.49802100  | 0.40329300  | -0.06221400 |
| C  | 1.48489800  | 2.02213800  | 0.56838300  |
| C  | 0.78105100  | 3.13923000  | 1.19287300  |
| C  | -0.05800100 | 3.96264200  | 0.51819800  |
| C  | -0.15564100 | 3.88396000  | -0.93593400 |
| C  | 0.59200000  | 2.98817900  | -1.62568800 |
| C  | 1.38362100  | 1.93956500  | -0.98646600 |
| H  | 2.48383200  | 1.82624900  | 0.97651300  |
| H  | 2.32510700  | 1.70780100  | -1.49921600 |
| H  | 0.61964900  | 3.04353000  | -2.72027800 |
| H  | 0.95457100  | 3.30906000  | 2.26200100  |
| H  | -0.58042500 | 4.76814500  | 1.04205500  |
| H  | -0.74963700 | 4.63208300  | -1.46865600 |
| C  | 0.97653700  | -1.52766200 | -0.00358200 |
| C  | 2.33867300  | -1.91361900 | 0.01838000  |
| C  | 0.01880500  | -2.57048700 | 0.00866800  |
| C  | 2.71315600  | -3.26108700 | 0.04192300  |
| C  | 0.40479900  | -3.91539600 | 0.03302600  |
| C  | 1.75096200  | -4.26688300 | 0.04721500  |
| H  | 3.77699600  | -3.51471600 | 0.05826500  |
| H  | -0.36741100 | -4.69036200 | 0.04250400  |
| H  | 2.04845600  | -5.31825600 | 0.06540500  |
| C  | -1.45042600 | 0.96831000  | 0.02528500  |
| N  | -2.14737800 | 1.33889400  | 1.11767400  |
| N  | -2.27470500 | 1.21937500  | -1.01051900 |
| C  | -3.40051900 | 1.81513500  | 0.78066300  |
| C  | -1.64079800 | 1.28956400  | 2.46541300  |
| C  | -3.48141700 | 1.73939600  | -0.58256700 |
| C  | -1.92674700 | 1.03228700  | -2.39597200 |
| H  | -1.67984100 | 2.28815800  | 2.92021000  |
| H  | -2.21991900 | 0.57839600  | 3.07149000  |
| H  | -0.59033600 | 0.97055500  | 2.42080400  |
| H  | -0.88458600 | 0.68809300  | -2.43999000 |
| H  | -2.58449000 | 0.28533200  | -2.86113800 |
| H  | -1.99866300 | 1.98673900  | -2.93404100 |
| C  | 3.41593200  | -0.88354200 | 0.02732200  |
| C  | 3.94660900  | -0.40863800 | -1.18528700 |
| C  | 3.91166000  | -0.40090600 | 1.25243100  |
| C  | 4.95557900  | 0.55708400  | -1.15208300 |
| C  | 4.92462200  | 0.56036900  | 1.24305100  |
| C  | 5.45446900  | 1.06017600  | 0.05117300  |
| H  | 5.36125300  | 0.93036000  | -2.09741400 |
| H  | 5.30452800  | 0.93770600  | 2.19747800  |
| C  | -1.43940900 | -2.26346900 | 0.00753000  |
| C  | -2.14577500 | -2.19170800 | -1.20462300 |
| C  | -2.11184200 | -2.06583100 | 1.22865700  |
| C  | -3.50869600 | -1.87681600 | -1.17912600 |
| C  | -3.47025300 | -1.74612500 | 1.21238500  |

|   |             |             |             |
|---|-------------|-------------|-------------|
| C | -4.18579300 | -1.63290500 | 0.01657000  |
| H | -4.05865600 | -1.82344300 | -2.12456400 |
| H | -3.98927900 | -1.58673300 | 2.16347200  |
| C | 3.33317300  | -0.88564600 | 2.55006900  |
| H | 3.38052000  | -1.98204100 | 2.63190600  |
| H | 3.85941700  | -0.44730800 | 3.40945300  |
| H | 2.26800500  | -0.61029900 | 2.61989400  |
| C | 3.41828400  | -0.91570200 | -2.49616400 |
| H | 3.95793500  | -0.46863200 | -3.34265000 |
| H | 3.50139600  | -2.01087800 | -2.56783700 |
| H | 2.34831100  | -0.67318200 | -2.60079000 |
| C | 6.50275000  | 2.13463700  | 0.06340600  |
| H | 7.15432100  | 2.07429700  | -0.82060800 |
| H | 6.03676300  | 3.13437100  | 0.05898200  |
| H | 7.13495500  | 2.07278100  | 0.96131800  |
| C | -1.37032300 | -2.21364800 | 2.52602700  |
| H | -2.01165400 | -1.97554300 | 3.38653300  |
| H | -0.99898900 | -3.24295300 | 2.64932200  |
| H | -0.47915400 | -1.56815300 | 2.55634500  |
| C | -1.44196700 | -2.45725400 | -2.50453700 |
| H | -0.54066800 | -1.83308600 | -2.60700800 |
| H | -1.09401600 | -3.50060900 | -2.55873800 |
| H | -2.10088400 | -2.27233300 | -3.36491400 |
| C | -5.63512600 | -1.24320000 | 0.02782000  |
| H | -6.10987900 | -1.41843600 | -0.94824200 |
| H | -6.20011900 | -1.80623300 | 0.78631200  |
| H | -5.75081300 | -0.17243700 | 0.26702200  |
| C | -4.38388900 | 2.26922000  | 1.79290300  |
| H | -5.30913700 | 2.60167500  | 1.30493800  |
| H | -4.64552700 | 1.45976800  | 2.49380500  |
| H | -3.99882700 | 3.11296800  | 2.38752100  |
| C | -4.57867400 | 2.08360900  | -1.51759700 |
| H | -4.91646500 | 1.19950300  | -2.08252400 |
| H | -5.44175500 | 2.47946200  | -0.96717200 |
| H | -4.26827600 | 2.84804900  | -2.24753800 |

### 38) TS[13-10]

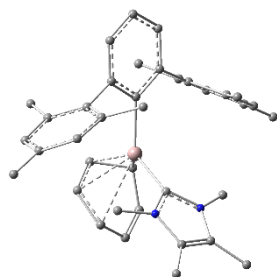

(Hydrogens are omitted for clarity)

Number of imaginary frequencies = 1 (130.3 cm<sup>-1</sup>)

E<sub>total</sub> = -1784.757324 a.u

G<sub>correction</sub> = 0.628409 a.u

Cartesian coordinates:

|    |             |             |             |
|----|-------------|-------------|-------------|
| Al | 0.17743900  | 0.08020900  | 0.74625300  |
| C  | 0.27344700  | -0.40097200 | 2.81345600  |
| C  | -0.89626800 | 0.37921200  | 2.82423700  |
| C  | -0.79942500 | 1.77192200  | 2.58827700  |
| C  | 0.46002800  | 2.41714100  | 2.91611300  |
| C  | 1.59873200  | 1.69087300  | 2.83354500  |
| C  | 1.47316700  | 0.33213800  | 2.22015400  |
| H  | 0.31704400  | -1.38721700 | 3.28603600  |
| H  | 2.39350600  | -0.25834000 | 2.21348400  |
| H  | 2.54738100  | 2.04061900  | 3.25421800  |
| H  | -1.86250800 | -0.07716400 | 3.07208700  |
| H  | -1.71702100 | 2.36204300  | 2.53347200  |
| H  | 0.44941000  | 3.43220500  | 3.32836200  |
| C  | 0.16689200  | -1.61999100 | -0.33154000 |
| C  | 1.39421300  | -2.19978900 | -0.73809200 |
| C  | -1.00527100 | -2.34921100 | -0.64100600 |
| C  | 1.44183000  | -3.44799400 | -1.37211600 |
| C  | -0.94584800 | -3.60006600 | -1.27037500 |
| C  | 0.27525500  | -4.15867100 | -1.62867900 |
| H  | 2.41244600  | -3.85525700 | -1.66959300 |
| H  | -1.87789100 | -4.13207700 | -1.48232600 |
| H  | 0.31627400  | -5.13582900 | -2.11649700 |
| C  | -0.35343600 | 1.76435000  | -0.29757900 |
| N  | -1.54442200 | 2.37983900  | -0.48422100 |
| N  | 0.57064800  | 2.70794500  | -0.59628800 |
| C  | -1.37542000 | 3.70109800  | -0.86275400 |
| C  | -0.02722400 | 3.90947300  | -0.94136700 |
| C  | 2.69541400  | -1.49380800 | -0.55325500 |
| C  | 3.10825700  | -0.54329500 | -1.50253600 |
| C  | 3.53987900  | -1.82717000 | 0.52334900  |
| C  | 4.34587000  | 0.08801600  | -1.33950100 |
| C  | 4.76148900  | -1.16759600 | 0.65658500  |
| C  | 5.18195100  | -0.19911000 | -0.26046100 |
| H  | 4.66675900  | 0.82520000  | -2.08261500 |
| H  | 5.40591700  | -1.41608900 | 1.50557700  |
| C  | -2.37529100 | -1.82714900 | -0.36095500 |
| C  | -3.09637600 | -1.20641400 | -1.39897300 |
| C  | -2.99198100 | -2.05176000 | 0.88631700  |
| C  | -4.42030900 | -0.81848800 | -1.17250500 |
| C  | -4.30024500 | -1.60406900 | 1.08669600  |
| C  | -5.03668900 | -0.99267900 | 0.06750700  |
| H  | -4.97974800 | -0.34571100 | -1.98604600 |
| H  | -4.76842600 | -1.76630600 | 2.06259600  |
| C  | 6.49124100  | 0.51253600  | -0.07612700 |
| H  | 6.44733600  | 1.20775000  | 0.77854800  |
| H  | 7.30907100  | -0.19572700 | 0.12794200  |
| H  | 6.76260600  | 1.09676300  | -0.96702000 |
| C  | -6.44996800 | -0.54518700 | 0.30779800  |
| H  | -6.50081900 | 0.20341300  | 1.11476200  |
| H  | -6.89137500 | -0.09921700 | -0.59470600 |
| H  | -7.08940500 | -1.38852400 | 0.61344800  |
| C  | -2.27603000 | -2.81915000 | 1.95766400  |
| H  | -2.81376800 | -2.76977700 | 2.91474500  |
| H  | -2.18283600 | -3.87917200 | 1.67086200  |
| H  | -1.25420200 | -2.44320400 | 2.10393200  |



|   |             |             |             |
|---|-------------|-------------|-------------|
| C | -2.44117700 | -0.93319800 | -2.72219800 |
| H | -2.09592800 | -1.86028600 | -3.20405500 |
| H | -3.12855000 | -0.41983000 | -3.40932100 |
| H | -1.54454100 | -0.30604800 | -2.58999400 |
| C | 3.12002300  | -2.86901100 | 1.51964700  |
| H | 2.11186100  | -2.66159400 | 1.90887800  |
| H | 3.07401400  | -3.86775800 | 1.05745900  |
| H | 3.81836400  | -2.91490600 | 2.36679200  |
| C | 2.23640700  | -0.21615700 | -2.68229400 |
| H | 2.72678800  | 0.50428800  | -3.35256500 |
| H | 1.99719400  | -1.12081700 | -3.26233100 |
| H | 1.26788400  | 0.20496500  | -2.36772200 |
| C | -2.81780200 | 1.81854700  | -0.11466400 |
| H | -3.25587700 | 2.38721800  | 0.71867200  |
| H | -3.51191300 | 1.82319300  | -0.96494600 |
| H | -2.67762000 | 0.78254800  | 0.20958100  |
| C | 1.99921700  | 2.51596800  | -0.50338300 |
| H | 2.45644600  | 2.43661000  | -1.50004200 |
| H | 2.45224000  | 3.34973200  | 0.04716700  |
| H | 2.19255200  | 1.59112400  | 0.05920900  |
| C | 0.75278900  | 5.11949200  | -1.29791900 |
| H | 0.08023800  | 5.93086500  | -1.60454500 |
| H | 1.34905800  | 5.48424000  | -0.44581900 |
| H | 1.44867300  | 4.92632100  | -2.12976800 |
| C | -2.51867800 | 4.61438800  | -1.10625100 |
| H | -3.12475700 | 4.76042000  | -0.19759400 |
| H | -2.15897600 | 5.60009500  | -1.42786900 |
| H | -3.18916100 | 4.22871800  | -1.89108100 |

### 39) TS[13-14]

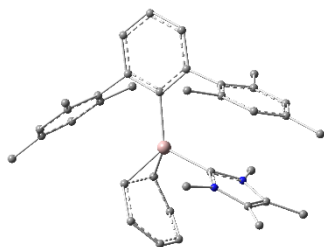

(Hydrogens are omitted for clarity)

Number of imaginary frequencies = 1 (401.7 cm<sup>-1</sup>)

E<sub>total</sub> = -1784.758521 a.u

G<sub>correction</sub> = 0.628362 a.u

Cartesian coordinates:

|    |             |             |             |
|----|-------------|-------------|-------------|
| Al | -0.53280400 | -0.48133200 | 0.00065200  |
| C  | -1.38128700 | -1.84871900 | 1.10370100  |
| C  | -0.75915400 | -3.05501700 | 1.47718200  |
| C  | 0.12069200  | -3.81320500 | 0.71007000  |
| C  | 0.11980000  | -3.81427600 | -0.70463900 |
| C  | -0.76100700 | -3.05723200 | -1.47177400 |
| C  | -1.38264900 | -1.85036600 | -1.09931500 |
| H  | -2.35641400 | -1.67257100 | 1.58091700  |

|   |             |             |             |
|---|-------------|-------------|-------------|
| H | -2.35838600 | -1.67491200 | -1.57552800 |
| H | -1.07238700 | -3.51271400 | -2.42350700 |
| H | -1.06930200 | -3.50906500 | 2.43000100  |
| H | 0.62446500  | -4.65605700 | 1.19705800  |
| H | 0.62295000  | -4.65787100 | -1.19098400 |
| C | -0.96619700 | 1.48198500  | -0.00040900 |
| C | -2.32440100 | 1.88176300  | -0.00082000 |
| C | -0.00252700 | 2.51854400  | -0.00058500 |
| C | -2.68961400 | 3.23338900  | -0.00143000 |
| C | -0.37754400 | 3.86791100  | -0.00119200 |
| C | -1.72000300 | 4.23026400  | -0.00162900 |
| H | -3.75150700 | 3.49532800  | -0.00174400 |
| H | 0.40092000  | 4.63655400  | -0.00132200 |
| H | -2.00885100 | 5.28435500  | -0.00210900 |
| C | 1.45368900  | -0.98378200 | -0.00042200 |
| N | 2.21889000  | -1.28223700 | 1.06646300  |
| N | 2.21739900  | -1.28381700 | -1.06793600 |
| C | 3.45427300  | -1.77088500 | 0.68216100  |
| C | 3.45332100  | -1.77189600 | -0.68463300 |
| C | 1.45747400  | 2.21798400  | -0.00015500 |
| C | 2.14889500  | 2.09746200  | 1.21826100  |
| C | 2.14918100  | 2.09578000  | -1.21830600 |
| C | 3.51284800  | 1.79479800  | 1.19793300  |
| C | 3.51303700  | 1.79301200  | -1.19731800 |
| C | 4.21068300  | 1.62025200  | 0.00052400  |
| H | 4.04903700  | 1.69844600  | 2.14788300  |
| H | 4.04936700  | 1.69521400  | -2.14704400 |
| C | -3.42105600 | 0.87114600  | -0.00056500 |
| C | -3.94879300 | 0.40837500  | -1.21924500 |
| C | -3.94907800 | 0.40936700  | 1.21839100  |
| C | -4.98022600 | -0.53296900 | -1.19757700 |
| C | -4.98042800 | -0.53205100 | 1.19726100  |
| C | -5.50360300 | -1.02453500 | -0.00002400 |
| H | -5.38323800 | -0.89753500 | -2.14747600 |
| H | -5.38362100 | -0.89587200 | 2.14737000  |
| C | 1.42763100  | 2.31064500  | 2.51827700  |
| H | 2.07916200  | 2.10489100  | 3.37940200  |
| H | 1.06870000  | 3.34847200  | 2.60151700  |
| H | 0.53092800  | 1.67688100  | 2.59277300  |
| C | 1.42817000  | 2.30746900  | -2.51870100 |
| H | 1.06895900  | 3.34511300  | -2.60299300 |
| H | 2.07997300  | 2.10109100  | -3.37947000 |
| H | 0.53165600  | 1.67340200  | -2.59280700 |
| C | 5.66027300  | 1.23239800  | 0.00077700  |
| H | 6.18362400  | 1.61618700  | -0.88721600 |
| H | 6.18117900  | 1.60819200  | 0.89358600  |
| H | 5.76984000  | 0.13422000  | -0.00410800 |
| C | -3.39515300 | 0.90495700  | 2.52299400  |
| H | -3.44281800 | 2.00249700  | 2.59093000  |
| H | -3.94207800 | 0.47844600  | 3.37537500  |
| H | -2.33270600 | 0.63054000  | 2.62411900  |
| C | -3.39432900 | 0.90259200  | -2.52413200 |
| H | -3.44088900 | 2.00012500  | -2.59282300 |
| H | -2.33213900 | 0.62702100  | -2.62494700 |
| H | -3.94157100 | 0.47601300  | -3.37627600 |
| C | -6.57267000 | -2.07827200 | 0.00034000  |
| H | -7.21455100 | -2.00344500 | 0.89035900  |

|   |             |             |             |
|---|-------------|-------------|-------------|
| H | -7.21205200 | -2.00660500 | -0.89172200 |
| H | -6.12549600 | -3.08657600 | 0.00278600  |
| C | 1.79921400  | -1.16102200 | -2.44140900 |
| H | 0.75812900  | -0.81995700 | -2.46011300 |
| H | 2.44018500  | -0.44486700 | -2.97457200 |
| H | 1.83664600  | -2.14115600 | -2.93599600 |
| C | 1.80247900  | -1.15776700 | 2.44032900  |
| H | 2.44427300  | -0.44112800 | 2.97182700  |
| H | 0.76148700  | -0.81647200 | 2.45998000  |
| H | 1.84032400  | -2.13735500 | 2.93596900  |
| C | 4.50140900  | -2.15371900 | 1.65886700  |
| H | 4.80846200  | -1.29457300 | 2.27770600  |
| H | 4.15495000  | -2.94768400 | 2.33926300  |
| H | 5.39268500  | -2.52685300 | 1.13822600  |
| C | 4.49907200  | -2.15633100 | -1.66220500 |
| H | 4.80513500  | -1.29830400 | -2.28308000 |
| H | 5.39114900  | -2.52843800 | -1.14219900 |
| H | 4.15171700  | -2.95157100 | -2.34066000 |

#### 40) Intermediate 14

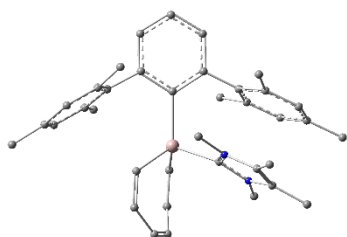

(Hydrogens are omitted for clarity)

Number of imaginary frequencies = 0

$E_{\text{total}} = -1784.785890$  a.u

$G_{\text{correction}} = 0.628873$  a.u

Cartesian coordinates:

|    |             |             |             |
|----|-------------|-------------|-------------|
| Al | 0.44973800  | -0.49763900 | 0.67793300  |
| C  | 1.77107100  | -1.86954700 | 0.13377300  |
| C  | 1.64087100  | -3.16804500 | 0.50200000  |
| C  | 0.66281000  | -3.78788000 | 1.38235700  |
| C  | 0.01682200  | -3.32663400 | 2.48982400  |
| C  | 0.05415400  | -2.03646100 | 3.15943100  |
| C  | 0.19510000  | -0.79951900 | 2.61941000  |
| H  | 2.64953100  | -1.67460500 | -0.49657100 |
| H  | 0.21397700  | 0.00432700  | 3.36971300  |
| H  | -0.09920100 | -2.12630000 | 4.24726100  |
| H  | 2.35066500  | -3.90654200 | 0.09390700  |
| H  | 0.51086200  | -4.85715300 | 1.18480700  |
| H  | -0.55636000 | -4.08903400 | 3.03398500  |
| C  | 0.75430900  | 1.43094300  | 0.10296500  |
| C  | 2.05272600  | 1.92844700  | -0.17292200 |
| C  | -0.30534100 | 2.36965200  | 0.02589900  |
| C  | 2.27321000  | 3.28002300  | -0.47085200 |
| C  | -0.07515700 | 3.71744500  | -0.27759100 |

|   |             |             |             |
|---|-------------|-------------|-------------|
| C | 1.21449800  | 4.17906900  | -0.51763200 |
| H | 3.29396100  | 3.62123700  | -0.66534200 |
| H | -0.92341100 | 4.40701100  | -0.32026100 |
| H | 1.39207600  | 5.23355200  | -0.74409400 |
| C | -1.20067900 | -1.17593600 | -0.38084000 |
| N | -1.17567200 | -1.31857100 | -1.72388600 |
| N | -2.41812900 | -1.61742900 | -0.01287700 |
| C | -2.36904100 | -1.83219300 | -2.20366900 |
| C | -0.01499400 | -1.05431500 | -2.54255700 |
| C | -3.16493800 | -2.01891900 | -1.10775000 |
| C | -2.88844900 | -1.71866200 | 1.34917400  |
| H | 0.64123500  | -0.35088100 | -2.01677200 |
| H | 0.54959400  | -1.97965000 | -2.72815600 |
| H | -0.31975800 | -0.60630800 | -3.49697000 |
| H | -2.92236000 | -2.77335900 | 1.65965000  |
| H | -2.18967400 | -1.18643600 | 2.00208900  |
| H | -3.88439500 | -1.26912200 | 1.43677900  |
| C | 3.23909700  | 1.02246200  | -0.19407800 |
| C | 3.83107900  | 0.57668000  | 1.00251200  |
| C | 3.77095100  | 0.61314600  | -1.43224200 |
| C | 4.91659200  | -0.30006100 | 0.93768900  |
| C | 4.85401300  | -0.26960400 | -1.45272500 |
| C | 5.43619900  | -0.74779700 | -0.27746800 |
| H | 5.36543500  | -0.64985500 | 1.87243700  |
| H | 5.25269400  | -0.59632400 | -2.41835500 |
| C | -1.72765600 | 1.97262300  | 0.25466000  |
| C | -2.56359600 | 1.69655300  | -0.84265800 |
| C | -2.25748500 | 1.94950500  | 1.56048000  |
| C | -3.89971400 | 1.35103900  | -0.61670800 |
| C | -3.59963900 | 1.60968900  | 1.74391000  |
| C | -4.43816200 | 1.30059300  | 0.66922700  |
| H | -4.54010800 | 1.12544300  | -1.47530800 |
| H | -4.00381800 | 1.59255500  | 2.76120000  |
| C | 3.30433300  | 1.00369900  | 2.34142300  |
| H | 2.88284100  | 2.01807000  | 2.31091600  |
| H | 2.50241200  | 0.32469300  | 2.67773000  |
| H | 4.09677300  | 0.97226400  | 3.10280100  |
| C | 3.19931200  | 1.11484400  | -2.72963200 |
| H | 3.56078700  | 2.13047500  | -2.95993200 |
| H | 3.48757600  | 0.46271900  | -3.56682400 |
| H | 2.10281000  | 1.18526500  | -2.69537600 |
| C | 6.56708500  | -1.73460300 | -0.31421600 |
| H | 7.06851700  | -1.74006800 | -1.29279200 |
| H | 7.32127600  | -1.51271300 | 0.45578500  |
| H | 6.20117200  | -2.75735100 | -0.12333500 |
| C | -1.41777600 | 2.36590000  | 2.73329400  |
| H | -1.37059400 | 3.46589900  | 2.79629400  |
| H | -1.83514500 | 1.99125900  | 3.67852100  |
| H | -0.38324700 | 2.01304900  | 2.63971600  |
| C | -2.05197500 | 1.81551700  | -2.24948700 |
| H | -2.65622200 | 1.21462200  | -2.94504000 |
| H | -2.09366100 | 2.86289000  | -2.59179600 |
| H | -1.00058700 | 1.51012100  | -2.32569100 |
| C | -5.87661400 | 0.93265400  | 0.90018100  |
| H | -6.41074700 | 1.72649000  | 1.44584300  |
| H | -6.40721300 | 0.76366700  | -0.04792100 |
| H | -5.97072900 | 0.01618400  | 1.50693600  |

|   |             |             |             |
|---|-------------|-------------|-------------|
| C | -4.55894800 | -2.51008300 | -0.98855400 |
| H | -5.22562800 | -1.72877500 | -0.58889900 |
| H | -4.94493500 | -2.80939700 | -1.97142600 |
| H | -4.63006000 | -3.38216500 | -0.31970900 |
| C | -2.62327700 | -2.07808600 | -3.64442700 |
| H | -1.88532500 | -2.77144300 | -4.07815100 |
| H | -3.61811400 | -2.51992800 | -3.78463400 |
| H | -2.58763100 | -1.14590800 | -4.23201300 |

#### 41) TS[7-9]

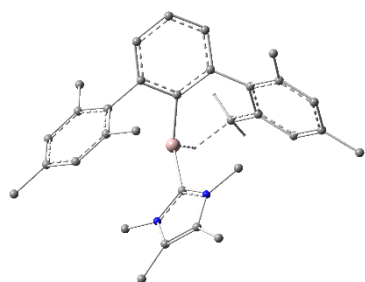

(Selected hydrogens are omitted for clarity)

Number of imaginary frequencies = 1 (1141.2 cm<sup>-1</sup>)

E<sub>total</sub> = -1552.900593 a.u

G<sub>correction</sub> = 0.530540 a.u

Cartesian coordinates:

|   |             |             |             |
|---|-------------|-------------|-------------|
| C | 0.41050600  | -1.60087300 | 0.17083900  |
| C | 1.74619800  | -2.02428300 | -0.08228800 |
| C | 1.94870100  | -3.24206800 | -0.76206400 |
| H | 2.96246900  | -3.63176400 | -0.87133600 |
| C | 0.88453600  | -3.95846500 | -1.29515100 |
| H | 1.07149100  | -4.90070100 | -1.81716000 |
| C | -0.41743000 | -3.46486600 | -1.18831700 |
| H | -1.25295300 | -3.99035500 | -1.65913400 |
| C | -0.64742300 | -2.30418400 | -0.44744300 |
| C | -2.02270300 | -1.72850900 | -0.33143800 |
| C | -2.40194900 | -0.67874100 | -1.19230300 |
| C | -3.67184800 | -0.10622100 | -1.05307100 |
| H | -3.95909400 | 0.71009000  | -1.72405000 |
| C | -4.58174500 | -0.55611600 | -0.09604600 |
| C | -4.19274700 | -1.60987100 | 0.73691400  |
| H | -4.88958300 | -1.97820700 | 1.49611000  |
| C | -2.93415100 | -2.20428100 | 0.63667100  |
| C | 2.87726100  | -1.12458800 | 0.23361300  |
| C | 2.92361000  | -0.43612400 | 1.48848500  |
| C | 3.85295800  | 0.62063800  | 1.65401300  |
| C | 4.75006700  | 0.97952200  | 0.66374800  |
| C | 4.71987700  | 0.26838300  | -0.54742400 |
| H | 5.41102900  | 0.54697800  | -1.34854700 |
| C | 3.80814200  | -0.76496800 | -0.77511300 |
| C | 2.05885200  | -0.79597700 | 2.59074600  |
| H | 0.60182500  | -0.34541000 | 2.95906000  |

|    |             |             |             |
|----|-------------|-------------|-------------|
| Al | -0.16629500 | -0.28796000 | 1.52860500  |
| C  | -0.41671200 | 1.55742600  | 0.62672500  |
| N  | 0.25472400  | 2.19279900  | -0.35517300 |
| C  | -0.43836100 | 3.29918000  | -0.80978600 |
| C  | -1.59479300 | 3.35274200  | -0.07753600 |
| N  | -1.54633900 | 2.28302200  | 0.79583200  |
| H  | 2.38997300  | -0.41441600 | 3.56367900  |
| H  | 1.78467200  | -1.85657800 | 2.63759300  |
| H  | 3.87198000  | 1.14566500  | 2.61418700  |
| C  | -2.53925000 | -3.31608900 | 1.56136700  |
| H  | -2.22054800 | -4.20932900 | 1.00412500  |
| H  | -1.68062100 | -3.00554800 | 2.18051000  |
| H  | -3.36577400 | -3.59326200 | 2.22997300  |
| C  | -1.47855800 | -0.19439700 | -2.27428800 |
| H  | -1.81569200 | 0.77012700  | -2.68133400 |
| H  | -0.44913700 | -0.08988400 | -1.90615700 |
| H  | -1.43725100 | -0.91853200 | -3.10415000 |
| C  | 3.80776000  | -1.38585100 | -2.14760500 |
| H  | 4.30358000  | -2.36898500 | -2.16074500 |
| H  | 2.78837000  | -1.54520000 | -2.52850800 |
| H  | 4.34954600  | -0.74117900 | -2.85458300 |
| C  | -2.60150000 | 1.96501400  | 1.73353500  |
| H  | -3.52303900 | 1.70487500  | 1.19491800  |
| H  | -2.28152900 | 1.08985000  | 2.32263700  |
| H  | -2.78258300 | 2.81517700  | 2.40641200  |
| C  | 1.53566400  | 1.77333300  | -0.87900300 |
| H  | 2.32474500  | 2.48694500  | -0.60454300 |
| H  | 1.79599100  | 0.79728700  | -0.45634900 |
| H  | 1.48638700  | 1.68493900  | -1.97267900 |
| C  | -2.73955300 | 4.29472300  | -0.12937100 |
| H  | -2.88659500 | 4.81525000  | 0.83028800  |
| H  | -2.57316100 | 5.05676600  | -0.90129200 |
| H  | -3.67932800 | 3.77197400  | -0.36926600 |
| C  | 0.07115200  | 4.17518500  | -1.89307300 |
| H  | 1.05813100  | 4.59565500  | -1.64402500 |
| H  | 0.17695100  | 3.62669900  | -2.84282700 |
| H  | -0.61710800 | 5.01249100  | -2.06492800 |
| C  | -5.94521100 | 0.06063000  | 0.03561500  |
| H  | -6.15093800 | 0.36834800  | 1.07339200  |
| H  | -6.05383300 | 0.94409700  | -0.61023900 |
| H  | -6.73489000 | -0.65480400 | -0.24607900 |
| C  | 5.74843100  | 2.08199100  | 0.87133700  |
| H  | 6.77737700  | 1.68682300  | 0.89702600  |
| H  | 5.71187600  | 2.81771100  | 0.05148600  |
| H  | 5.57171200  | 2.61536100  | 1.81632700  |

## 42) Intermediate 9

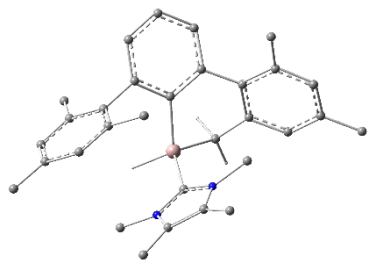

(Selected hydrogens are omitted for clarity)

Number of imaginary frequencies = 0

$E_{\text{total}} = -1553.003677$  a.u

$G_{\text{correction}} = 0.532657$  a.u

Cartesian coordinates:

|    |             |             |             |
|----|-------------|-------------|-------------|
| C  | 0.43557500  | -1.45667400 | 0.12611300  |
| C  | 1.75550900  | -1.88944800 | -0.16059000 |
| C  | 1.95364600  | -3.11142300 | -0.82175300 |
| H  | 2.96886700  | -3.48454400 | -0.97234600 |
| C  | 0.87449500  | -3.85376800 | -1.29316800 |
| H  | 1.04791300  | -4.80449300 | -1.80407100 |
| C  | -0.42143500 | -3.36804200 | -1.13932100 |
| H  | -1.27164300 | -3.91596900 | -1.55616700 |
| C  | -0.63812600 | -2.18288600 | -0.42529600 |
| C  | -2.02844500 | -1.65142000 | -0.29124900 |
| C  | -2.45937000 | -0.63383500 | -1.16389800 |
| C  | -3.76476000 | -0.14268100 | -1.05294700 |
| H  | -4.09567000 | 0.63868600  | -1.74518600 |
| C  | -4.65702400 | -0.63362100 | -0.09792500 |
| C  | -4.20662200 | -1.63737100 | 0.76396200  |
| H  | -4.88532700 | -2.03306900 | 1.52602500  |
| C  | -2.91261100 | -2.15762200 | 0.68204600  |
| C  | 2.92283000  | -1.00352000 | 0.13724400  |
| C  | 3.04235800  | -0.32964500 | 1.38578800  |
| C  | 4.11261700  | 0.55481100  | 1.58027300  |
| C  | 5.05355200  | 0.82769400  | 0.58855100  |
| C  | 4.89271000  | 0.19866100  | -0.64498400 |
| H  | 5.59188100  | 0.42498100  | -1.45602600 |
| C  | 3.85038700  | -0.70382200 | -0.88940000 |
| C  | 2.00625900  | -0.44979600 | 2.44461900  |
| H  | -0.98788200 | -0.55413700 | 2.68201000  |
| Al | 0.19331800  | -0.18618100 | 1.64839000  |
| C  | -0.39605500 | 1.60982100  | 0.80132900  |
| N  | 0.21089300  | 2.28767700  | -0.19739200 |
| C  | -0.64209900 | 3.21285400  | -0.77298900 |
| C  | -1.82438400 | 3.11661900  | -0.09076800 |
| N  | -1.63716000 | 2.13835100  | 0.86888400  |
| H  | 2.28319300  | 0.11784400  | 3.34434800  |
| H  | 1.87090700  | -1.50619100 | 2.74678600  |
| H  | 4.19689500  | 1.05462400  | 2.55024000  |
| C  | -2.46229800 | -3.22949300 | 1.62941400  |
| H  | -2.10423800 | -4.11906500 | 1.09018200  |
| H  | -1.62075000 | -2.86825300 | 2.24113500  |
| H  | -3.27476700 | -3.53318700 | 2.30406200  |

|   |             |             |             |
|---|-------------|-------------|-------------|
| C | -1.54160200 | -0.09698800 | -2.22465800 |
| H | -2.00720700 | 0.73632100  | -2.77004300 |
| H | -0.59312500 | 0.24716000  | -1.78857700 |
| H | -1.27515300 | -0.88233000 | -2.94959800 |
| C | 3.73453500  | -1.24687500 | -2.29072700 |
| H | 4.19796300  | -2.24046500 | -2.39600600 |
| H | 2.68735200  | -1.35445500 | -2.60698700 |
| H | 4.24741600  | -0.57757600 | -2.99698200 |
| C | -2.66773900 | 1.73272300  | 1.80058800  |
| H | -3.54044800 | 1.35594600  | 1.25062600  |
| H | -2.27210300 | 0.91792700  | 2.41911000  |
| H | -2.95994300 | 2.58101000  | 2.43628000  |
| C | 1.55434700  | 2.03322300  | -0.66948200 |
| H | 2.09922200  | 1.43439000  | 0.06784400  |
| H | 1.53481000  | 1.47744000  | -1.61867200 |
| H | 2.08865100  | 2.98096700  | -0.81490100 |
| C | 6.20635900  | 1.75397700  | 0.84659500  |
| H | 7.05067900  | 1.21298500  | 1.30635700  |
| H | 6.57847400  | 2.20683500  | -0.08430800 |
| H | 5.92815300  | 2.56410900  | 1.53725900  |
| C | -6.06396600 | -0.11466500 | -0.00537200 |
| H | -6.78723500 | -0.85677100 | -0.38177800 |
| H | -6.34658700 | 0.10661100  | 1.03580100  |
| H | -6.19697800 | 0.80254000  | -0.59775800 |
| C | -3.11144400 | 3.83391500  | -0.25981400 |
| H | -3.39443100 | 4.39018900  | 0.64792300  |
| H | -3.04374700 | 4.55321600  | -1.08584600 |
| H | -3.93018500 | 3.13259300  | -0.48725300 |
| C | -0.24498400 | 4.07246500  | -1.91476100 |
| H | 0.59776300  | 4.73419600  | -1.65800400 |
| H | 0.05969400  | 3.47134000  | -2.78623200 |
| H | -1.08497400 | 4.70774000  | -2.22329000 |



### 3. References

---

- 1 N. Kuhn and T. Kratz, *Synthesis*, 1993, 561–562.
- 2 D. Savaia, E. Tagliavini, C. Trombini and A. Umani-Ronchi, *J. Org. Chem.*, 1981, **46**, 5344–5348.
- 3 H. Schneider, A. Hock, R. Bertermann and U. Radius, *Chem. Eur. J.*, 2017, **23**, 12387–12398.
- 4 C. Weetman, A. Porzelt, P. Bag, F. Hanusch and S. Inoue, *Chem. Sci.*, 2020, **11**, 4817–4827
- 5 G. Sheldrick, *Acta Cryst.*, 2015, **A71**, 3–8
- 6 G. Sheldrick, *Acta Cryst.*, 2008, **A64**, 112–122.
- 7 Gaussian 09, Revision E.01, M. J. Frisch, G. W. Trucks, H. B. Schlegel, G. E. Scuseria, M. A. Robb, J. R. Cheeseman, G. Scalmani, V. Barone, B. Mennucci, G. A. Petersson, H. Nakatsuji, M. Caricato, X. Li, H. P. Hratchian, A. F. Izmaylov, J. Bloino, G. Zheng, J. L. Sonnenberg, M. Hada, M. Ehara, K. Toyota, R. Fukuda, J. Hasegawa, M. Ishida, T. Nakajima, Y. Honda, O. Kitao, H. Nakai, T. Vreven, J. A. Montgomery, Jr., J. E. Peralta, F. Ogliaro, M. Bearpark, J. J. Heyd, E. Brothers, K. N. Kudin, V. N. Staroverov, R. Kobayashi, J. Normand, K. Raghavachari, A. Rendell, J. C. Burant, S. S. Iyengar, J. Tomasi, M. Cossi, N. Rega, J. M. Millam, M. Klene, J. E. Knox, J. B. Cross, V. Bakken, C. Adamo, J. Jaramillo, R. Gomperts, R. E. Stratmann, O. Yazyev, A. J. Austin, R. Cammi, C. Pomelli, J. W. Ochterski, R. L. Martin, K. Morokuma, V. G. Zakrzewski, G. A. Voth, P. Salvador, J. J. Dannenberg, S. Dapprich, A. D. Daniels, Ö. Farkas, J. B. Foresman, J. V. Ortiz, J. Cioslowski and D. J. Fox, Gaussian, Inc., Wallingford CT, 2009.
- 8 (a) J. P. Perdew, K. Burke and M. Ernzerhof, *Phys. Rev. Lett.*, 1996, **77**, 3865–3868; (b) J. P. Perdew, K. Burke and M. Ernzerhof, *Phys. Rev. Lett.*, 1996, **78**, 1396–1396; (c) C. Adamo and V. J. Barone, *Chem. Phys.*, 1999, **110**, 6158–6170; (d) M. Ernzerhof and G. E. Scuseria, *J. Chem. Phys.*, 1999, **110**, 5029–5036.
- 9 F. Weigend and R. Ahlrichs, *Phys. Chem. Chem. Phys.*, 2005, **7**, 3297–3305.
- 10 (a) S. Grimme, J. Antony, S. Ehrlich and H. Krieg, *J. Chem. Phys.*, 2010, **132**, 154104; (b) S. Grimme, S. Ehrlich and L. Goerigk, *J. Comput. Chem.*, 2011, **32**, 1456–1465.
- 11 (a) J. D. Queen, A. Lehmann, J. C. Fetting, H. M. Tuononen and P. P. Power. *J. Am. Chem. Soc.*, 2020, **142**, 20554–20559; (b) J. Hicks, P. Vasko, J. M. Goicoechea and S. Aldridge, *J. Am. Chem. Soc.*, 2019, **141**, 11000–11003.
- 12 J. Baker, *J. Comp. Chem.*, 1986, **7**, 385–395.

- 
- 13 (a) A. L. L. East and G. M. Berner, A. D. Morcom and L. Mihichuk, *J. Chem. Theory Comput.*, 2008, **4**, 1274-1282; (b) A. Jayaraman and A. L. L. East, *J. Org. Chem.*, 2012, **77**, 351-356; (c) S. Nilewar, A. Jayaraman and B. T. Sterenberg, *Organometallics*, 2018, **37**, 4699-4710; (d) A. Jayaraman, G. M. Berner, L. M. Mihichuk and A. L. L. East, *J. Mol. Catal. A*, 2011, **351**, 143-153; (e) A. Jayaraman, H. Powell-Davies and F.-G. Fontaine, *Tetrahedron*, 2019, **75**, 2118-2127.
- 14 A. V. Marenich, C. J. Cramer and D. G. Truhlar, *J. Phys. Chem. B*, 2009, **113**, 6378-6396.
- 15 (a) S. F. Boy and F. Bernardi, *Mol. Phys.*, 1970, **19**, 553; (b) S. Simon, M. Duran and J. J. Dannenberg, *J. Chem. Phys.*, 1996, **105**, 11024-11031.
